# Supplementary material for: Self-formation of concentric zones of telencephalic and ocular tissues and directional retinal ganglion cell axons
Source: eLife. 2023 Sep 4;12:RP87306. doi: 10.7554/eLife.87306 (PMC10476969; doi:10.7554/eLife.87306)
Supplement: Supplementary file 1. [file elife-87306-supp1.xlsx]

## Sheet: Sheet1
	p_val	avg_logFC	pct.1	pct.2	p_val_adj	cluster	gene
KCNQ1OT1	0	-1.31827	0.085	0.824	0	0	KCNQ1OT1
AKAP9	5.10601e-288	-0.628429	0.136	0.818	1.71245e-283	0	AKAP9
MACF1	1.01534e-284	-0.541978	0.087	0.741	3.40524e-280	0	MACF1
GOLGB1	3.80935e-277	-0.565118	0.117	0.772	1.27758e-272	0	GOLGB1
SYNE2	1.13701e-276	-0.753655	0.131	0.783	3.81332e-272	0	SYNE2
MT-ND4	2.2976e-275	-0.773031	0.53	0.98	7.70568e-271	0	MT-ND4
DYNC1H1	2.6747e-269	-0.516906	0.12	0.779	8.97042e-265	0	DYNC1H1
FZD3	3.58749e-268	-0.502724	0.136	0.8	1.20317e-263	0	FZD3
ZNF292	9.45527e-262	-0.500933	0.138	0.8	3.17111e-257	0	ZNF292
MT-ND5	1.81207e-256	-0.712186	0.283	0.93	6.07733e-252	0	MT-ND5
KMT2A	4.30004e-255	-0.488036	0.108	0.739	1.44215e-250	0	KMT2A
NKTR	7.61876e-254	-0.534629	0.137	0.787	2.55518e-249	0	NKTR
MTDH	6.35559e-247	-0.309573	0.131	0.768	2.13154e-242	0	MTDH
MT-ND2	4.23732e-246	-0.729638	0.379	0.959	1.42111e-241	0	MT-ND2
MT-CO1	5.20944e-242	-0.682027	0.806	0.993	1.74714e-237	0	MT-CO1
DST	7.68452e-242	-0.647545	0.068	0.646	2.57724e-237	0	DST
MT-CO2	9.0795e-240	-0.741221	0.727	0.987	3.04508e-235	0	MT-CO2
ATRX	3.73347e-239	-0.478719	0.232	0.903	1.25213e-234	0	ATRX
CCDC88A	2.8595e-235	-0.40284	0.14	0.768	9.59018e-231	0	CCDC88A
MT-ND1	3.7541e-235	-0.688635	0.477	0.966	1.25905e-230	0	MT-ND1
ZNF638	4.4632e-233	-0.411518	0.116	0.722	1.49687e-228	0	ZNF638
MARCH6	5.35711e-233	-0.353573	0.12	0.734	1.79667e-228	0	MARCH6
CADM1	5.82948e-233	-0.513661	0.134	0.749	1.95509e-228	0	CADM1
MT-ND3	6.25578e-232	-0.710751	0.446	0.95	2.09806e-227	0	MT-ND3
KIDINS220	4.98858e-231	-0.449858	0.094	0.683	1.67307e-226	0	KIDINS220
GLG1	2.83655e-230	-0.412803	0.056	0.613	9.51322e-226	0	GLG1
KIF1B	3.60877e-230	-0.369196	0.104	0.7	1.21031e-225	0	KIF1B
SLC39A10	5.04169e-228	-0.299229	0.139	0.763	1.69088e-223	0	SLC39A10
ZNF462	3.56542e-227	-0.401366	0.113	0.712	1.19577e-222	0	ZNF462
MT-CO3	2.4542e-226	-0.695947	0.805	0.991	8.23088e-222	0	MT-CO3
NSD3	4.56415e-225	-0.356691	0.171	0.812	1.53072e-220	0	NSD3
GABPB1-AS1	1.16882e-219	-0.399798	0.168	0.796	3.92e-215	0	GABPB1-AS1
MT-ND6	1.37579e-218	-0.343044	0.106	0.683	4.61414e-214	0	MT-ND6
RSF1	3.63493e-218	-0.289343	0.159	0.779	1.21908e-213	0	RSF1
NES	1.7033e-215	-0.679571	0.124	0.689	5.71254e-211	0	NES
SYT11	3.4248e-215	-0.407582	0.067	0.609	1.14861e-210	0	SYT11
GOLGA4	3.55218e-215	-0.370854	0.136	0.731	1.19133e-210	0	GOLGA4
BOD1L1	1.08545e-214	-0.324286	0.129	0.723	3.64038e-210	0	BOD1L1
AFDN	2.59923e-214	-0.280083	0.138	0.74	8.71731e-210	0	AFDN
ZKSCAN1	2.2431e-213	-0.299428	0.123	0.713	7.52291e-209	0	ZKSCAN1
FTX	2.5499e-212	-0.520977	0.059	0.588	8.55185e-208	0	FTX
MT-ND4L	1.4918e-211	-0.405431	0.053	0.578	5.00319e-207	0	MT-ND4L
PRRC2C	1.51952e-211	-0.302415	0.249	0.908	5.09617e-207	0	PRRC2C
KANSL1	1.06868e-207	-0.381944	0.103	0.665	3.58414e-203	0	KANSL1
ANKRD12	5.43872e-207	-0.37706	0.122	0.699	1.82404e-202	0	ANKRD12
SQLE	8.42991e-207	-0.373682	0.126	0.704	2.82722e-202	0	SQLE
NCAM1	9.20254e-207	-0.402662	0.097	0.649	3.08635e-202	0	NCAM1
CHD9	5.20961e-206	-0.268387	0.166	0.781	1.7472e-201	0	CHD9
CD46	5.58817e-206	-0.374701	0.092	0.641	1.87416e-201	0	CD46
ARID1A	4.21045e-205	-0.286243	0.102	0.662	1.4121e-200	0	ARID1A
SPAG9	6.2605e-205	-0.306384	0.129	0.712	2.09965e-200	0	SPAG9
VCAN	4.01764e-204	-0.707798	0.067	0.585	1.34744e-199	0	VCAN
SEC63	3.28043e-203	-0.316664	0.089	0.635	1.10019e-198	0	SEC63
PLPPR3	1.38155e-201	-0.262067	0.129	0.7	4.63345e-197	0	PLPPR3
ANKRD11	1.53137e-201	-0.282181	0.185	0.801	5.1359e-197	0	ANKRD11
BPTF	3.88805e-201	-0.281499	0.225	0.866	1.30398e-196	0	BPTF
MT-ATP6	6.30863e-201	-0.609246	0.675	0.978	2.11579e-196	0	MT-ATP6
FAT1	9.03081e-200	-0.387096	0.085	0.621	3.02875e-195	0	FAT1
ZBTB20	2.83877e-199	-0.571521	0.071	0.588	9.52067e-195	0	ZBTB20
FADS1	2.63795e-198	-0.270671	0.166	0.766	8.84714e-194	0	FADS1
HSPA5	4.68116e-198	-0.362906	0.191	0.794	1.56997e-193	0	HSPA5
CEP170	8.58731e-198	-0.336858	0.093	0.633	2.88001e-193	0	CEP170
SLC39A6	4.39888e-197	-0.2519	0.076	0.599	1.4753e-192	0	SLC39A6
BTG1	6.69275e-196	-0.452673	0.243	0.861	2.24462e-191	0	BTG1
KTN1	2.84495e-194	-0.255428	0.179	0.777	9.54138e-190	0	KTN1
POLR2J3.1	9.16157e-192	-0.370444	0.064	0.572	3.07261e-187	0	POLR2J3.1
ACVR2B	3.86408e-190	-0.324921	0.069	0.575	1.29594e-185	0	ACVR2B
ARHGAP21	8.40256e-190	-0.257277	0.113	0.659	2.81805e-185	0	ARHGAP21
SARAF	1.18414e-189	-0.268398	0.192	0.804	3.97136e-185	0	SARAF
SPTBN1	3.31458e-189	-0.328216	0.056	0.549	1.11164e-184	0	SPTBN1
EIF3A	3.51577e-189	-0.251038	0.208	0.818	1.17912e-184	0	EIF3A
KIF5C	6.05767e-189	-0.516696	0.103	0.627	2.03162e-184	0	KIF5C
PCNX4	9.11263e-189	-0.278017	0.079	0.593	3.05619e-184	0	PCNX4
CXADR	1.06461e-186	-0.290664	0.104	0.633	3.57048e-182	0	CXADR
DAAM1	3.86934e-186	-0.282862	0.165	0.738	1.2977e-181	0	DAAM1
MT-CYB	4.14617e-186	-0.607178	0.71	0.982	1.39054e-181	0	MT-CYB
MAP4K4	1.63418e-185	-0.263054	0.161	0.732	5.48071e-181	0	MAP4K4
FGFR1	8.72217e-183	-0.375389	0.056	0.535	2.92524e-178	0	FGFR1
KDM5B	1.35074e-182	-0.272223	0.127	0.671	4.53011e-178	0	KDM5B
MEX3A	1.38842e-182	-0.25082	0.122	0.663	4.65649e-178	0	MEX3A
CLSTN1	2.0966e-182	-0.309043	0.062	0.55	7.03158e-178	0	CLSTN1
CDH2	4.72342e-179	-0.430012	0.307	0.904	1.58414e-174	0	CDH2
TRIM24	3.92194e-178	-0.314317	0.087	0.588	1.31534e-173	0	TRIM24
PTPRF	1.03681e-176	-0.301069	0.055	0.528	3.47727e-172	0	PTPRF
AKAP12	4.60288e-175	-0.483466	0.208	0.773	1.54371e-170	0	AKAP12
ATP2B1	6.8908e-175	-0.40658	0.051	0.515	2.31104e-170	0	ATP2B1
MIA3	1.26871e-173	-0.286437	0.051	0.517	4.25499e-169	0	MIA3
MYCBP2	3.7526e-173	-0.294325	0.056	0.522	1.25855e-168	0	MYCBP2
WSB1	1.69704e-171	-0.487352	0.305	0.922	5.69155e-167	0	WSB1
APLP2	5.74272e-171	-0.285253	0.242	0.841	1.92599e-166	0	APLP2
CRMP1	2.34899e-169	-0.407296	0.096	0.58	7.87803e-165	0	CRMP1
CCDC47	9.8827e-168	-0.327242	0.053	0.506	3.31446e-163	0	CCDC47
APLP1	2.72347e-166	-0.345728	0.072	0.54	9.13398e-162	0	APLP1
DLK1	4.7644e-163	-0.942815	0.184	0.674	1.59788e-158	0	DLK1
NEAT1	2.91836e-161	-0.292046	0.181	0.698	9.78759e-157	0	NEAT1
ZEB1	5.97131e-161	-0.333369	0.073	0.531	2.00266e-156	0	ZEB1
FOXG1	1.94047e-160	-0.487846	0.086	0.548	6.50794e-156	0	FOXG1
SYT1	3.39463e-160	-0.592093	0.077	0.526	1.13849e-155	0	SYT1
MEIS2	4.38674e-160	-0.337818	0.12	0.616	1.47123e-155	0	MEIS2
SOX11	5.48698e-159	-0.586811	0.323	0.889	1.84022e-154	0	SOX11
FGFBP3	1.24905e-158	-0.489211	0.091	0.552	4.18907e-154	0	FGFBP3
PTPRZ1	1.11668e-156	-0.73715	0.056	0.485	3.74514e-152	0	PTPRZ1
HSP90B1	5.22791e-155	-0.420739	0.304	0.865	1.75333e-150	0	HSP90B1
RDH11	5.54332e-155	-0.267086	0.053	0.484	1.85912e-150	0	RDH11
LIMCH1	6.9055e-155	-0.291802	0.069	0.514	2.31597e-150	0	LIMCH1
PCDH9	9.52992e-155	-0.482884	0.06	0.493	3.19614e-150	0	PCDH9
AUTS2	1.22729e-154	-0.373171	0.052	0.482	4.11608e-150	0	AUTS2
UTRN	4.207e-154	-0.295611	0.059	0.495	1.41094e-149	0	UTRN
TRIP11	1.0333e-153	-0.250013	0.053	0.484	3.46547e-149	0	TRIP11
SPEN	3.88089e-153	-0.267956	0.05	0.478	1.30157e-148	0	SPEN
ACSL3	2.71908e-152	-0.251017	0.05	0.475	9.11925e-148	0	ACSL3
ADGRV1	3.4858e-152	-0.468592	0.042	0.456	1.16907e-147	0	ADGRV1
PEG10	4.49542e-152	-0.449134	0.114	0.583	1.50767e-147	0	PEG10
MAP1B	7.9328e-152	-0.622097	0.49	0.973	2.6605e-147	0	MAP1B
GPI	8.42592e-152	-0.437151	0.131	0.61	2.82588e-147	0	GPI
CAMK2N1	4.89426e-151	-0.394314	0.078	0.516	1.64144e-146	0	CAMK2N1
HMGCR	8.70577e-151	-0.261108	0.071	0.514	2.91974e-146	0	HMGCR
ZNF91	2.26872e-150	-0.25899	0.061	0.493	7.60885e-146	0	ZNF91
MIAT	5.3164e-150	-0.744699	0.067	0.491	1.78301e-145	0	MIAT
COL11A1	1.39017e-148	-0.304349	0.06	0.486	4.66237e-144	0	COL11A1
BICD1	3.6742e-148	-0.259501	0.059	0.484	1.23225e-143	0	BICD1
VPS13C	1.08668e-147	-0.262482	0.056	0.478	3.64449e-143	0	VPS13C
NOVA1	2.0809e-146	-0.354908	0.063	0.488	6.97891e-142	0	NOVA1
PXDN	3.28142e-146	-0.286072	0.079	0.515	1.10052e-141	0	PXDN
LRP2	2.06559e-145	-0.332574	0.044	0.45	6.92757e-141	0	LRP2
ZFHX3	1.85786e-143	-0.387272	0.062	0.479	6.23088e-139	0	ZFHX3
EPHB2	9.64581e-141	-0.253088	0.046	0.445	3.23501e-136	0	EPHB2
ANKRD26	5.24654e-139	-0.290129	0.046	0.44	1.75958e-134	0	ANKRD26
ITGB8	5.96099e-139	-0.261164	0.054	0.457	1.9992e-134	0	ITGB8
SLC5A3	6.19906e-137	-0.273816	0.046	0.439	2.07904e-132	0	SLC5A3
ADGRL3	9.6686e-137	-0.311221	0.028	0.403	3.24266e-132	0	ADGRL3
FBXO22	1.90929e-136	-0.25456	0.066	0.476	6.40339e-132	0	FBXO22
NECTIN3	2.746e-136	-0.300812	0.042	0.43	9.20953e-132	0	NECTIN3
GDI1	7.97305e-135	-0.254417	0.059	0.458	2.674e-130	0	GDI1
SDK2	4.8816e-133	-0.300709	0.032	0.402	1.63719e-128	0	SDK2
TXNIP	1.28337e-130	-0.546722	0.065	0.455	4.30416e-126	0	TXNIP
RIC3	1.48692e-129	-0.314445	0.049	0.429	4.98682e-125	0	RIC3
NRCAM	2.33067e-127	-0.267556	0.045	0.416	7.81659e-123	0	NRCAM
MAPK10	2.36985e-127	-0.276901	0.043	0.412	7.94799e-123	0	MAPK10
CD24	2.75789e-127	-0.258444	0.299	0.846	9.2494e-123	0	CD24
CELSR2	1.1248e-125	-0.324021	0.017	0.361	3.77236e-121	0	CELSR2
LINC00632	3.75189e-125	-0.322521	0.038	0.398	1.25831e-120	0	LINC00632
BNIP3	7.9214e-125	-0.315101	0.168	0.624	2.65668e-120	0	BNIP3
MAP6	2.78854e-123	-0.26755	0.064	0.444	9.35221e-119	0	MAP6
NNAT	3.9231e-122	-0.523442	0.273	0.776	1.31573e-117	0	NNAT
PWAR6	1.31527e-121	-0.255581	0.039	0.394	4.41114e-117	0	PWAR6
BASP1	3.15074e-121	-0.333091	0.344	0.891	1.0567e-116	0	BASP1
CRABP1	4.86135e-121	0.735434	0.913	0.839	1.6304e-116	0	CRABP1
MALAT1	1.99194e-120	-0.464704	0.996	1	6.68056e-116	0	MALAT1
LINC00461	3.49746e-120	-0.761054	0.018	0.348	1.17298e-115	0	LINC00461
LRP1	6.62366e-120	-0.261765	0.029	0.372	2.22144e-115	0	LRP1
P4HA1	3.61558e-119	-0.275109	0.06	0.428	1.21259e-114	0	P4HA1
INTU	1.04984e-118	-0.274008	0.061	0.431	3.52096e-114	0	INTU
GPC2	2.4578e-118	-0.293194	0.036	0.38	8.24295e-114	0	GPC2
IGFBP2	9.28364e-117	-0.610557	0.568	0.966	3.11355e-112	0	IGFBP2
SFRP1	1.14143e-116	-0.341169	0.236	0.705	3.82813e-112	0	SFRP1
MLLT11	1.11872e-115	-0.262566	0.266	0.77	3.75197e-111	0	MLLT11
PCDH7	1.21635e-115	-0.316629	0.137	0.544	4.07938e-111	0	PCDH7
PNISR	1.75309e-114	-0.306487	0.408	0.955	5.87952e-110	0	PNISR
COL2A1	5.02241e-114	-0.303361	0.191	0.627	1.68442e-109	0	COL2A1
RNF165	5.69002e-114	-0.25629	0.045	0.388	1.90832e-109	0	RNF165
PAM	5.71233e-114	-0.262817	0.036	0.37	1.9158e-109	0	PAM
TTYH1	7.51698e-114	-0.312009	0.241	0.706	2.52105e-109	0	TTYH1
LINC01551	6.10222e-113	-0.499698	0.178	0.589	2.04656e-108	0	LINC01551
TMEM131	1.76751e-112	-0.253021	0.023	0.344	5.92787e-108	0	TMEM131
ANK3	3.02927e-112	-0.324756	0.056	0.404	1.01596e-107	0	ANK3
MIR99AHG	1.01141e-110	-0.262378	0.045	0.383	3.39206e-106	0	MIR99AHG
NOTCH1	8.26575e-108	-0.306978	0.023	0.335	2.77217e-103	0	NOTCH1
TTC3	1.3948e-107	-0.285042	0.422	0.953	4.67787e-103	0	TTC3
ENO2	2.87101e-105	-0.299468	0.073	0.424	9.62878e-101	0	ENO2
PRH1	3.88407e-105	-0.274851	0.02	0.323	1.30264e-100	0	PRH1
IGDCC3	4.05549e-104	-0.264917	0.049	0.376	1.36013e-99	0	IGDCC3
DCX	6.31668e-103	-0.71793	0.036	0.343	2.11849e-98	0	DCX
ELAVL3	3.14421e-100	-0.50965	0.018	0.305	1.0545e-95	0	ELAVL3
FSIP2	1.55191e-99	-0.355175	0.03	0.329	5.20481e-95	0	FSIP2
RGMA	1.88026e-96	-0.302997	0.028	0.319	6.30603e-92	0	RGMA
CREB5	7.13406e-96	-0.293123	0.044	0.349	2.39262e-91	0	CREB5
DPYSL3	5.36848e-95	-0.291499	0.049	0.354	1.80048e-90	0	DPYSL3
POU3F3	1.20627e-94	-0.447878	0.019	0.297	4.04559e-90	0	POU3F3
FAM171B	3.43621e-94	-0.267252	0.025	0.308	1.15244e-89	0	FAM171B
DNER	3.93792e-94	-0.290426	0.028	0.314	1.3207e-89	0	DNER
TMTC2	3.52259e-91	-0.253696	0.015	0.282	1.18141e-86	0	TMTC2
RTN1	1.72029e-90	-0.463474	0.046	0.336	5.76951e-86	0	RTN1
ADGRG1	3.33454e-90	-0.290053	0.018	0.285	1.11834e-85	0	ADGRG1
MIR124-2HG	1.53201e-88	-0.289413	0.025	0.295	5.13807e-84	0	MIR124-2HG
PDLIM3	2.32527e-88	-0.261075	0.036	0.317	7.79851e-84	0	PDLIM3
STMN4	3.75924e-88	-0.376669	0.05	0.34	1.26077e-83	0	STMN4
HES5	2.35052e-87	-0.50244	0.086	0.395	7.88317e-83	0	HES5
GAP43	1.83311e-84	-0.459154	0.067	0.359	6.14788e-80	0	GAP43
AHNAK	2.21365e-84	-0.276221	0.03	0.295	7.42412e-80	0	AHNAK
TAGLN3	6.836e-83	-0.410704	0.048	0.322	2.29266e-78	0	TAGLN3
NSG1	7.69348e-81	-0.362163	0.032	0.29	2.58024e-76	0	NSG1
CCDC25	9.96303e-80	0.251807	0.156	0.53	3.3414e-75	0	CCDC25
MPPED2	1.90994e-79	-0.252396	0.025	0.274	6.40557e-75	0	MPPED2
KIF5A	1.16909e-78	-0.287076	0.024	0.27	3.92091e-74	0	KIF5A
CAPZA1	7.26919e-78	0.253976	0.201	0.614	2.43794e-73	0	CAPZA1
NDUFA12	2.70483e-76	0.263025	0.247	0.706	9.07145e-72	0	NDUFA12
CFAP298	2.14105e-74	0.261011	0.153	0.51	7.18064e-70	0	CFAP298
EIF2S2	2.85521e-74	0.299803	0.245	0.689	9.57581e-70	0	EIF2S2
PRKAR1A	1.6351e-73	0.292246	0.228	0.656	5.4838e-69	0	PRKAR1A
DNAJC8	1.19691e-72	0.284639	0.263	0.725	4.01421e-68	0	DNAJC8
PRELID1	3.2683e-71	0.254019	0.261	0.717	1.09612e-66	0	PRELID1
TMEM230	1.88108e-68	0.26399	0.256	0.699	6.30876e-64	0	TMEM230
ASCL1	2.58717e-68	-0.385698	0.042	0.278	8.67685e-64	0	ASCL1
PPP1CA	7.6516e-68	0.288798	0.202	0.59	2.56619e-63	0	PPP1CA
EBNA1BP2	7.04634e-67	0.264945	0.141	0.469	2.3632e-62	0	EBNA1BP2
CALM2	5.26976e-66	0.511402	0.846	0.969	1.76737e-61	0	CALM2
ARL6IP4	1.63364e-64	0.26154	0.273	0.719	5.47891e-60	0	ARL6IP4
VPS29	2.77039e-63	0.25375	0.19	0.55	9.29135e-59	0	VPS29
AP2S1	5.98469e-63	0.271771	0.269	0.713	2.00715e-58	0	AP2S1
HNRNPF	9.02764e-63	0.254417	0.273	0.716	3.02769e-58	0	HNRNPF
SIVA1	6.34881e-61	0.250646	0.241	0.646	2.12926e-56	0	SIVA1
TUBB2B	2.81629e-60	-0.422533	0.598	0.954	9.44528e-56	0	TUBB2B
HSPB1	1.07666e-59	0.267347	0.214	0.586	3.6109e-55	0	HSPB1
FAM92A	1.14492e-59	0.277293	0.207	0.568	3.83984e-55	0	FAM92A
SOX4	5.71153e-56	-0.381176	0.51	0.932	1.91553e-51	0	SOX4
RAB13	3.58995e-55	0.291417	0.191	0.525	1.204e-50	0	RAB13
NDUFB2	4.44854e-55	0.250659	0.296	0.738	1.49195e-50	0	NDUFB2
RHOC	4.7819e-54	0.266996	0.17	0.485	1.60375e-49	0	RHOC
ASPM	1.09322e-53	-0.26551	0.066	0.278	3.66646e-49	0	ASPM
B2M	1.85201e-53	0.254156	0.259	0.644	6.21128e-49	0	B2M
CTNNB1	8.21857e-53	0.277246	0.313	0.758	2.75634e-48	0	CTNNB1
DUT	3.22546e-52	0.267265	0.289	0.696	1.08176e-47	0	DUT
GMNN	4.58742e-52	0.257457	0.137	0.415	1.53853e-47	0	GMNN
CSTB	1.08019e-50	0.27276	0.328	0.792	3.62273e-46	0	CSTB
RAB34	2.17844e-49	0.290949	0.162	0.455	7.30605e-45	0	RAB34
RBM8A	8.64025e-49	0.284563	0.337	0.799	2.89777e-44	0	RBM8A
SAP18	1.10821e-48	0.259311	0.343	0.824	3.71673e-44	0	SAP18
NUDT4	1.06667e-47	0.296018	0.155	0.433	3.57741e-43	0	NUDT4
HIF1A	7.69795e-47	0.329899	0.258	0.628	2.58174e-42	0	HIF1A
GSTP1	1.12264e-46	0.44576	0.815	0.947	3.7651e-42	0	GSTP1
SNRPG	2.77687e-46	0.312512	0.32	0.763	9.31308e-42	0	SNRPG
ANXA5	5.35635e-46	0.361238	0.242	0.599	1.79641e-41	0	ANXA5
WDR34	4.55123e-45	0.255592	0.126	0.372	1.52639e-40	0	WDR34
UROD	2.94729e-44	0.260993	0.107	0.334	9.88462e-40	0	UROD
CENPF	2.7025e-43	-0.263484	0.231	0.491	9.06364e-39	0	CENPF
PCNA	3.18081e-42	0.327771	0.202	0.504	1.06678e-37	0	PCNA
VAMP3	8.15771e-42	0.261668	0.117	0.347	2.73593e-37	0	VAMP3
ISYNA1	1.31657e-41	0.254587	0.34	0.774	4.41553e-37	0	ISYNA1
STMN2	3.54758e-41	-1.18686	0.103	0.278	1.18979e-36	0	STMN2
TAGLN2	2.41779e-40	0.260126	0.121	0.347	8.10877e-36	0	TAGLN2
UBE2T	2.90324e-39	0.260517	0.153	0.398	9.73687e-35	0	UBE2T
TOX	7.87882e-39	0.250717	0.141	0.378	2.6424e-34	0	TOX
OST4	1.24618e-38	0.265133	0.358	0.817	4.17945e-34	0	OST4
NR2F6	1.36455e-36	0.414685	0.268	0.616	4.57642e-32	0	NR2F6
MAF	1.58817e-36	0.273126	0.216	0.502	5.32642e-32	0	MAF
H2AFX	4.41878e-36	0.278558	0.197	0.461	1.48197e-31	0	H2AFX
COTL1	6.50193e-36	0.278369	0.322	0.705	2.18062e-31	0	COTL1
PTN	6.99767e-36	0.307706	0.142	0.365	2.34688e-31	0	PTN
RHOA	7.21362e-36	0.285292	0.362	0.804	2.4193e-31	0	RHOA
S100A13	4.47881e-35	0.324518	0.139	0.362	1.5021e-30	0	S100A13
RFLNB	7.43774e-35	0.309328	0.134	0.351	2.49447e-30	0	RFLNB
MYL12A	2.70533e-34	0.302819	0.352	0.775	9.07314e-30	0	MYL12A
QPRT	1.63375e-33	0.34987	0.263	0.591	5.47926e-29	0	QPRT
SH3BGRL3	1.38782e-32	0.267702	0.37	0.789	4.65449e-28	0	SH3BGRL3
HNRNPM	1.09302e-31	0.325044	0.372	0.795	3.66577e-27	0	HNRNPM
ZWINT	1.54726e-31	0.254622	0.1	0.277	5.18919e-27	0	ZWINT
HOMER2	1.28381e-30	0.299086	0.146	0.353	4.30565e-26	0	HOMER2
SELENOP	7.99499e-30	0.250902	0.202	0.44	2.68136e-25	0	SELENOP
GYG1	3.75593e-29	0.296939	0.144	0.347	1.25966e-24	0	GYG1
MYL12B	9.79186e-29	0.364641	0.375	0.808	3.284e-24	0	MYL12B
ARL4C	4.34793e-28	0.275176	0.339	0.691	1.45821e-23	0	ARL4C
MYL6	2.11048e-26	0.370528	0.766	0.955	7.07814e-22	0	MYL6
ACTB	6.8633e-25	0.257095	0.913	0.982	2.30181e-20	0	ACTB
TYMS	7.3475e-25	0.316406	0.253	0.511	2.4642e-20	0	TYMS
CLTA	7.36898e-25	0.330423	0.402	0.84	2.47141e-20	0	CLTA
PLP1	1.27824e-23	0.256409	0.125	0.288	4.28695e-19	0	PLP1
CLIC1	1.47524e-22	0.324748	0.4	0.811	4.94765e-18	0	CLIC1
RGS5	4.90573e-21	0.348749	0.204	0.409	1.64528e-16	0	RGS5
TUBA1A	4.7531e-18	-0.256011	0.911	0.992	1.59409e-13	0	TUBA1A
HMGB1	4.92214e-18	0.329823	0.827	0.975	1.65079e-13	0	HMGB1
CDK1	7.88105e-18	0.263404	0.124	0.26	2.64315e-13	0	CDK1
PCLAF	1.51837e-17	0.387793	0.178	0.349	5.09232e-13	0	PCLAF
APOE	4.4194e-17	0.27687	0.225	0.413	1.48218e-12	0	APOE
RCAN1	2.80396e-16	0.395993	0.124	0.254	9.40392e-12	0	RCAN1
DAPL1	2.97594e-16	0.535083	0.564	0.566	9.9807e-12	0	DAPL1
SPHK1	3.29254e-16	0.385629	0.17	0.333	1.10425e-11	0	SPHK1
CYP1B1	6.55052e-16	-0.276517	0.343	0.513	2.19691e-11	0	CYP1B1
ANXA2	2.54987e-15	0.577491	0.608	0.777	8.55175e-11	0	ANXA2
KRT8	3.46347e-15	0.405622	0.191	0.359	1.16158e-10	0	KRT8
NUSAP1	7.07187e-15	0.283912	0.186	0.338	2.37176e-10	0	NUSAP1
SRP14	1.01223e-14	0.304541	0.721	0.96	3.39481e-10	0	SRP14
ERICH5	1.4281e-14	0.305443	0.128	0.252	4.78957e-10	0	ERICH5
KRT18	2.14588e-14	0.401369	0.148	0.286	7.19686e-10	0	KRT18
TBX2	1.1477e-13	0.359287	0.153	0.289	3.84916e-09	0	TBX2
LHX2	4.98435e-13	0.314766	0.407	0.753	1.67165e-08	0	LHX2
TPM2	8.21656e-13	0.491066	0.26	0.467	2.75567e-08	0	TPM2
EGR1	2.77394e-12	0.260677	0.408	0.712	9.30325e-08	0	EGR1
TUBB4B	2.92046e-12	0.36993	0.407	0.731	9.79463e-08	0	TUBB4B
RBP1	3.9036e-12	0.29768	0.726	0.901	1.30919e-07	0	RBP1
RANBP1	9.22731e-11	0.35402	0.449	0.829	3.09465e-06	0	RANBP1
UBE2C	1.63623e-10	0.326234	0.158	0.271	5.48757e-06	0	UBE2C
CALD1	1.91197e-10	0.453033	0.426	0.769	6.41235e-06	0	CALD1
ALDH1A1	3.94379e-10	0.666846	0.403	0.386	1.32267e-05	0	ALDH1A1
TUBA1B	3.01053e-09	0.279004	0.8	0.953	0.000100967	0	TUBA1B
CNN3	1.37356e-08	0.296242	0.476	0.85	0.000460666	0	CNN3
HMGB2	3.67781e-08	0.342909	0.405	0.657	0.00123347	0	HMGB2
IFITM2	6.65233e-08	0.662721	0.503	0.638	0.00223106	0	IFITM2
ID2	2.39809e-07	0.477052	0.331	0.55	0.0080427	0	ID2
SIX6	1.0182e-06	0.602011	0.464	0.553	0.0341485	0	SIX6
CSRP2	1.09692e-06	0.415835	0.467	0.817	0.0367884	0	CSRP2
HMGN3	7.6441e-06	0.297815	0.501	0.876	0.256368	0	HMGN3
PFN1	1.20703e-05	0.319807	0.497	0.876	0.404815	0	PFN1
H2AFZ	2.18812e-05	0.311584	0.717	0.953	0.733851	0	H2AFZ
PRDX6	2.76568e-05	0.37569	0.469	0.819	0.927553	0	PRDX6
IER2	4.05689e-05	0.349471	0.478	0.81	1	0	IER2
HMX1	8.16284e-05	0.648988	0.408	0.478	1	0	HMX1
MORF4L1	0.000136227	0.266816	0.528	0.923	1	0	MORF4L1
TPM1	0.000251798	0.495552	0.609	0.848	1	0	TPM1
TAGLN	0.000338148	0.682755	0.266	0.393	1	0	TAGLN
FOS	0.000369799	0.300947	0.477	0.736	1	0	FOS
NUCKS1	0.000606575	0.353392	0.65	0.945	1	0	NUCKS1
ID1	0.00263837	0.471969	0.349	0.525	1	0	ID1
RAB31	0.00649447	0.53703	0.364	0.564	1	0	RAB31
PEBP1	0.007042	0.266695	0.614	0.933	1	0	PEBP1
LINC00461.1	0	1.09804	0.896	0.231	0	1	LINC00461
PTPRZ1.1	0	1.06134	0.946	0.365	0	1	PTPRZ1
NES.1	0	0.920107	0.962	0.573	0	1	NES
TTYH1.1	0	0.88251	0.983	0.604	0	1	TTYH1
C1orf61	0	0.836186	0.627	0.145	0	1	C1orf61
POU3F3.1	0	0.822761	0.797	0.193	0	1	POU3F3
EDNRB	0	0.739128	0.517	0.098	0	1	EDNRB
PDLIM3.1	0	0.730653	0.769	0.219	0	1	PDLIM3
SOX3	0	0.730361	0.739	0.235	0	1	SOX3
CRABP1.1	0	-2.67126	0.593	0.881	0	1	CRABP1
RGMA.1	1.35015e-291	0.631319	0.709	0.228	4.52813e-287	1	RGMA
FGFBP3.1	5.32395e-284	0.913689	0.865	0.446	1.78555e-279	1	FGFBP3
AL139246.5	1.31387e-279	0.819485	0.526	0.129	4.40645e-275	1	AL139246.5
RPS24	2.54946e-273	0.427838	1	0.972	8.55039e-269	1	RPS24
SFRP1.1	6.11915e-267	0.828187	0.965	0.605	2.05224e-262	1	SFRP1
MGST1	2.14446e-263	0.717945	0.922	0.46	7.19209e-259	1	MGST1
LINC01551.1	2.36743e-259	0.734435	0.981	0.48	7.9399e-255	1	LINC01551
RPL18A	1.8498e-257	0.429994	0.999	0.96	6.20387e-253	1	RPL18A
DLK1.1	4.50009e-257	0.978642	0.938	0.57	1.50924e-252	1	DLK1
RPS23	1.35909e-252	0.398445	0.999	0.971	4.5581e-248	1	RPS23
MOXD1	1.50664e-248	0.560842	0.491	0.122	5.05298e-244	1	MOXD1
CKB	1.74305e-247	0.590188	1	0.933	5.84586e-243	1	CKB
TMEM158	4.20627e-245	0.527462	0.484	0.118	1.4107e-240	1	TMEM158
CDO1	5.16151e-243	0.660942	0.775	0.368	1.73107e-238	1	CDO1
RPS19	7.44199e-241	0.428159	0.998	0.974	2.49589e-236	1	RPS19
CREB5.1	5.97039e-239	0.610155	0.695	0.261	2.00235e-234	1	CREB5
HES5.1	3.14419e-233	0.989036	0.744	0.307	1.0545e-228	1	HES5
RPSA	8.54758e-227	0.409441	0.997	0.945	2.86669e-222	1	RPSA
VEPH1	2.32782e-224	0.511494	0.48	0.133	7.80703e-220	1	VEPH1
RPS8	7.87689e-222	0.383132	0.997	0.971	2.64175e-217	1	RPS8
RPS27L	2.82226e-219	0.701439	0.955	0.668	9.46529e-215	1	RPS27L
SIX6.1	1.19348e-215	-1.46406	0.106	0.598	4.00268e-211	1	SIX6
RPL5	1.3635e-214	0.394038	1	0.964	4.5729e-210	1	RPL5
QKI	5.43039e-214	0.599287	0.962	0.723	1.82124e-209	1	QKI
RPS15A	4.61419e-213	0.384465	0.997	0.948	1.54751e-208	1	RPS15A
RPS7	7.32863e-209	0.357425	0.999	0.959	2.45788e-204	1	RPS7
RPS27A	1.3406e-208	0.344006	0.998	0.97	4.49609e-204	1	RPS27A
TRIM9	1.75704e-205	0.44494	0.472	0.128	5.89276e-201	1	TRIM9
MEIS2.1	1.95631e-205	0.555362	0.876	0.512	6.56108e-201	1	MEIS2
HES4	5.16879e-205	0.672675	0.915	0.603	1.73351e-200	1	HES4
NACA	5.32517e-204	0.355986	1	0.961	1.78595e-199	1	NACA
RPS25	2.15635e-201	0.377341	0.996	0.942	7.23197e-197	1	RPS25
RPL13	1.62331e-199	0.331118	0.998	0.982	5.44425e-195	1	RPL13
CALM2.1	6.21072e-198	-0.792053	0.977	0.95	2.08295e-193	1	CALM2
FOXG1.1	3.73312e-195	0.569732	0.877	0.44	1.25201e-190	1	FOXG1
RPS13	6.60342e-194	0.357174	0.999	0.956	2.21466e-189	1	RPS13
RPL6	1.30076e-193	0.33836	0.999	0.977	4.36248e-189	1	RPL6
RPL32	1.67832e-192	0.35677	0.999	0.964	5.62876e-188	1	RPL32
RPL10	2.6267e-189	0.320721	1	0.985	8.80942e-185	1	RPL10
FAM181B	3.87199e-189	0.334073	0.273	0.044	1.29859e-184	1	FAM181B
VCAM1	6.07952e-189	0.34615	0.288	0.05	2.03895e-184	1	VCAM1
RPS15	4.35237e-186	0.33149	0.999	0.956	1.4597e-181	1	RPS15
RBP1.1	1.26749e-184	-0.957516	0.756	0.894	4.25089e-180	1	RBP1
RPL39	1.95566e-184	0.362067	0.997	0.939	6.55889e-180	1	RPL39
RPLP0	1.70138e-182	0.337527	1	0.964	5.70608e-178	1	RPLP0
LINC01351	2.57184e-177	0.285389	0.265	0.044	8.62545e-173	1	LINC01351
CAPN6	6.29222e-177	0.369548	0.252	0.04	2.11029e-172	1	CAPN6
RPL7A	4.25472e-173	0.308461	1	0.972	1.42695e-168	1	RPL7A
PTX3	2.71823e-171	0.489088	0.408	0.116	9.1164e-167	1	PTX3
RPS11	9.20492e-170	0.360443	0.997	0.956	3.08715e-165	1	RPS11
ZEB1.1	2.43519e-166	0.513197	0.785	0.433	8.16713e-162	1	ZEB1
RPS3A	4.53166e-166	0.324378	1	0.982	1.51983e-161	1	RPS3A
RPS18	8.23731e-166	0.319545	0.998	0.974	2.76263e-161	1	RPS18
RPS3	1.97783e-165	0.31334	0.998	0.966	6.63326e-161	1	RPS3
RPL18	1.18716e-164	0.325081	0.997	0.954	3.98149e-160	1	RPL18
LDHB	1.51404e-163	0.374231	0.997	0.902	5.07777e-159	1	LDHB
PDPN	2.51807e-162	0.54544	0.706	0.382	8.44512e-158	1	PDPN
MIR99AHG.1	6.89275e-161	0.456525	0.638	0.302	2.31169e-156	1	MIR99AHG
HOXB5	5.3679e-160	0.421514	0.434	0.123	1.80029e-155	1	HOXB5
SOX21	1.66263e-159	0.425454	0.377	0.103	5.57611e-155	1	SOX21
SOX2	1.8759e-159	0.519654	0.978	0.692	6.29141e-155	1	SOX2
LINC02381	5.81154e-159	0.46754	0.356	0.086	1.94907e-154	1	LINC02381
RPL13A	1.05873e-157	0.303989	0.997	0.979	3.55076e-153	1	RPL13A
FEZF1-AS1	1.68758e-157	0.332351	0.334	0.08	5.6598e-153	1	FEZF1-AS1
RPL9	2.85461e-157	0.319525	0.995	0.962	9.57378e-153	1	RPL9
RACK1	7.12979e-157	0.317411	1	0.955	2.39119e-152	1	RACK1
HMX1.1	2.29543e-156	-1.31489	0.109	0.515	7.69842e-152	1	HMX1
GSX2	4.79316e-156	0.327549	0.285	0.058	1.60753e-151	1	GSX2
RAB8B	4.07056e-154	0.491076	0.657	0.332	1.36518e-149	1	RAB8B
DAPL1.1	3.28332e-153	-1.83614	0.273	0.603	1.10116e-148	1	DAPL1
TRIM24.1	6.88766e-153	0.561303	0.777	0.493	2.30998e-148	1	TRIM24
TXNIP.1	7.97971e-153	0.508048	0.745	0.362	2.67623e-148	1	TXNIP
FAM171B.1	2.12188e-152	0.472923	0.556	0.236	7.11635e-148	1	FAM171B
TMEM161B-AS1	2.8451e-151	0.421712	0.537	0.216	9.54189e-147	1	TMEM161B-AS1
CDH6	4.71848e-151	-1.44218	0.111	0.508	1.58249e-146	1	CDH6
PCDH7.1	5.18936e-151	-1.04519	0.142	0.537	1.74041e-146	1	PCDH7
RPS2	2.63428e-150	0.293166	1	0.976	8.83485e-146	1	RPS2
RPL29	1.78455e-148	0.301894	0.998	0.956	5.98501e-144	1	RPL29
RPS5	7.4661e-145	0.313707	0.995	0.939	2.50398e-140	1	RPS5
CYP1B1.1	3.8077e-144	-1.89495	0.161	0.534	1.27703e-139	1	CYP1B1
RPS16	1.46489e-142	0.299411	0.995	0.946	4.91294e-138	1	RPS16
RPL4	5.52052e-142	0.345857	0.995	0.912	1.85147e-137	1	RPL4
RPL21	3.14573e-141	0.280892	0.995	0.963	1.05502e-136	1	RPL21
CCNB1IP1	3.91676e-141	0.457692	0.848	0.59	1.3136e-136	1	CCNB1IP1
HNRNPA1	2.16922e-139	0.333376	0.999	0.946	7.27513e-135	1	HNRNPA1
ENO1	2.41124e-139	0.472804	0.989	0.887	8.08681e-135	1	ENO1
CENPV	7.85744e-139	0.460181	0.939	0.689	2.63523e-134	1	CENPV
FABP5	1.00527e-138	0.554344	0.938	0.709	3.37147e-134	1	FABP5
RPL11	5.48658e-137	0.261277	0.998	0.973	1.84009e-132	1	RPL11
MAB21L1	4.25642e-136	-1.14311	0.085	0.457	1.42752e-131	1	MAB21L1
RPL22	5.64379e-134	0.314554	0.995	0.926	1.89281e-129	1	RPL22
IQGAP2	5.35221e-133	0.44186	0.45	0.17	1.79502e-128	1	IQGAP2
RPL8	3.85948e-129	0.264534	0.997	0.96	1.29439e-124	1	RPL8
POU3F2	6.63025e-128	0.318467	0.424	0.14	2.22365e-123	1	POU3F2
RPS14	9.48063e-128	0.256419	0.997	0.975	3.17961e-123	1	RPS14
BCAT1	8.98123e-126	0.435313	0.623	0.327	3.01212e-121	1	BCAT1
FEZ1	1.52627e-125	0.391709	0.786	0.471	5.1188e-121	1	FEZ1
MYL6.1	2.08475e-123	-0.506734	0.971	0.926	6.99185e-119	1	MYL6
SNCAIP	2.80411e-123	0.311191	0.323	0.093	9.40441e-119	1	SNCAIP
VCAN.1	3.39539e-123	0.318167	0.827	0.48	1.13875e-118	1	VCAN
SFRP2	5.38493e-123	-2.3497	0.68	0.791	1.806e-118	1	SFRP2
LDB2	5.76566e-122	0.271933	0.265	0.064	1.93369e-117	1	LDB2
SPINT2	3.15353e-121	-0.758649	0.25	0.587	1.05763e-116	1	SPINT2
RPL10A	1.38978e-120	0.280391	0.996	0.946	4.66104e-116	1	RPL10A
SOX6	2.29059e-120	0.302822	0.465	0.182	7.68219e-116	1	SOX6
ADGRV1.1	3.74554e-120	0.455176	0.666	0.37	1.25618e-115	1	ADGRV1
YBX1	1.19747e-119	0.321977	0.998	0.931	4.01608e-115	1	YBX1
ANXA2.1	2.34198e-118	-0.911749	0.66	0.768	7.85452e-114	1	ANXA2
CP	3.14844e-118	-1.19384	0.054	0.397	1.05592e-113	1	CP
STMN1	3.28314e-118	-0.516744	0.981	0.953	1.1011e-113	1	STMN1
ID4	8.08775e-118	0.599241	0.97	0.788	2.71247e-113	1	ID4
CCND2	1.75822e-117	0.413231	0.878	0.61	5.89673e-113	1	CCND2
ZBTB20.1	5.86797e-117	0.480638	0.774	0.491	1.968e-112	1	ZBTB20
NAP1L1	1.5118e-116	0.323719	0.997	0.93	5.07027e-112	1	NAP1L1
EIF3E	8.72171e-114	0.355596	0.982	0.839	2.92509e-109	1	EIF3E
TFDP2	2.35871e-113	0.4695	0.842	0.623	7.91064e-109	1	TFDP2
IGFBP2.1	4.85578e-113	0.486321	0.997	0.905	1.62853e-108	1	IGFBP2
RBMS1	7.33961e-113	-0.63056	0.065	0.405	2.46156e-108	1	RBMS1
RPL12	2.39577e-112	0.277898	0.997	0.947	8.03492e-108	1	RPL12
NPM1	2.71531e-112	0.281761	0.998	0.933	9.1066e-108	1	NPM1
FGFR2	9.09997e-112	0.338769	0.367	0.128	3.05195e-107	1	FGFR2
SRI	1.64845e-111	0.372649	0.93	0.713	5.52856e-107	1	SRI
NPAS3	4.38076e-111	0.417135	0.524	0.254	1.46922e-106	1	NPAS3
C5orf30	7.91716e-111	0.385504	0.512	0.243	2.65526e-106	1	C5orf30
RPS12	5.54065e-109	0.257524	0.995	0.969	1.85822e-104	1	RPS12
EPHA3	3.22388e-108	0.361422	0.291	0.084	1.08122e-103	1	EPHA3
SELENOP.1	1.77432e-107	-0.807141	0.117	0.447	5.95071e-103	1	SELENOP
RPL23	2.69648e-107	0.279727	0.999	0.95	9.04347e-103	1	RPL23
NOTCH1.1	1.55396e-106	0.390672	0.533	0.265	5.21168e-102	1	NOTCH1
ID3	2.30996e-106	-1.10449	0.353	0.625	7.74713e-102	1	ID3
PAPPA	3.37996e-104	0.361564	0.43	0.177	1.13357e-99	1	PAPPA
RAX	3.45329e-104	-0.915494	0.047	0.362	1.15817e-99	1	RAX
ARL4C.1	5.50204e-104	-0.79443	0.421	0.675	1.84528e-99	1	ARL4C
RPL26	3.26382e-103	0.265179	0.995	0.947	1.09462e-98	1	RPL26
RPS27	1.01189e-101	0.256214	0.997	0.943	3.39368e-97	1	RPS27
ID2.1	2.5243e-100	-0.831815	0.247	0.558	8.46599e-96	1	ID2
AK4	7.00279e-100	0.305129	0.427	0.172	2.3486e-95	1	AK4
CRABP2	8.95138e-99	0.299111	0.76	0.443	3.00211e-94	1	CRABP2
EEF1D	6.69388e-97	0.319863	0.975	0.815	2.24499e-92	1	EEF1D
SPHK1.1	9.52559e-96	-0.620235	0.045	0.346	3.19469e-91	1	SPHK1
SYNE2.1	4.03551e-95	0.375356	0.915	0.673	1.35343e-90	1	SYNE2
APOE.1	9.02495e-95	-0.886708	0.12	0.424	3.02679e-90	1	APOE
PRDM16	4.36249e-93	0.262144	0.311	0.108	1.46309e-88	1	PRDM16
RAB31.1	2.14561e-92	-0.925051	0.306	0.568	7.19594e-88	1	RAB31
PKDCC	3.96355e-92	-0.796071	0.183	0.476	1.3293e-87	1	PKDCC
ID1.1	4.0062e-92	-0.843792	0.244	0.536	1.3436e-87	1	ID1
CD99	4.80285e-92	0.355545	0.898	0.672	1.61078e-87	1	CD99
CDKN1C	7.3854e-92	-0.785348	0.349	0.631	2.47692e-87	1	CDKN1C
RGS5.1	2.08277e-91	-0.790613	0.123	0.417	6.98519e-87	1	RGS5
RPS10	4.50557e-91	0.290848	0.981	0.885	1.51108e-86	1	RPS10
FBN2	4.72611e-91	-0.518801	0.071	0.37	1.58504e-86	1	FBN2
HS6ST1	6.03939e-91	0.318135	0.424	0.193	2.02549e-86	1	HS6ST1
SRGAP1	3.79481e-90	0.394509	0.653	0.398	1.2727e-85	1	SRGAP1
EIF3H	2.03697e-89	0.295138	0.944	0.779	6.83159e-85	1	EIF3H
FGF19	3.0059e-89	-0.548517	0.044	0.332	1.00812e-84	1	FGF19
S1PR3	3.29792e-89	-0.769413	0.046	0.329	1.10606e-84	1	S1PR3
TBX2.1	9.57715e-89	-0.562711	0.024	0.304	3.21199e-84	1	TBX2
ACKR3	3.38772e-88	0.355374	0.366	0.147	1.13617e-83	1	ACKR3
MDK	3.45065e-88	-0.523568	0.975	0.903	1.15728e-83	1	MDK
HMGCS1	1.74147e-87	0.406786	0.803	0.562	5.84055e-83	1	HMGCS1
PABPC1	6.68242e-86	0.290675	0.976	0.833	2.24115e-81	1	PABPC1
ATP1B3	6.74042e-86	0.364958	0.812	0.592	2.2606e-81	1	ATP1B3
NUDT12	9.79879e-86	0.380832	0.397	0.178	3.28632e-81	1	NUDT12
PTBP2	6.56309e-85	0.296159	0.679	0.441	2.20113e-80	1	PTBP2
IFITM2.1	1.22768e-84	-1.01164	0.465	0.641	4.1174e-80	1	IFITM2
SEMA6A	2.8293e-84	-0.685275	0.273	0.54	9.48889e-80	1	SEMA6A
TGFB2	2.10535e-83	-0.494178	0.044	0.319	7.06094e-79	1	TGFB2
PCSK1N	2.56703e-83	-0.718762	0.519	0.702	8.60931e-79	1	PCSK1N
NR2F1	3.65795e-83	0.337346	0.959	0.782	1.2268e-78	1	NR2F1
SCD	7.18689e-83	0.356268	0.658	0.417	2.41034e-78	1	SCD
SCRG1	2.73671e-82	0.379178	0.466	0.228	9.17838e-78	1	SCRG1
FZD8	3.50602e-81	0.319354	0.465	0.229	1.17585e-76	1	FZD8
BTG1.1	4.89789e-81	0.285885	0.952	0.761	1.64265e-76	1	BTG1
RPL36	5.51642e-81	0.254449	0.991	0.906	1.8501e-76	1	RPL36
SEMA3A	8.20438e-81	-0.51156	0.061	0.334	2.75159e-76	1	SEMA3A
KRT8.1	1.66928e-80	-0.619237	0.09	0.369	5.59844e-76	1	KRT8
RPL36A	4.05319e-80	0.295534	0.898	0.731	1.35936e-75	1	RPL36A
LINC01833	5.24005e-80	-0.68147	0.31	0.568	1.75741e-75	1	LINC01833
ACTB.1	6.19758e-80	-0.333722	0.997	0.97	2.07855e-75	1	ACTB
SLC1A3	1.56789e-79	0.294105	0.294	0.108	5.25838e-75	1	SLC1A3
FDFT1	1.74075e-79	0.325175	0.797	0.576	5.83812e-75	1	FDFT1
PEG10.1	2.13161e-79	0.332911	0.738	0.496	7.14898e-75	1	PEG10
H3F3B	1.71353e-78	-0.362437	0.997	0.959	5.74682e-74	1	H3F3B
FGFR1.1	3.17652e-78	0.325985	0.679	0.448	1.06534e-73	1	FGFR1
TMEM123	3.60621e-78	0.30668	0.758	0.532	1.20945e-73	1	TMEM123
TPM2.1	1.5728e-77	-0.735557	0.201	0.471	5.27486e-73	1	TPM2
PTCH1	6.37681e-77	0.304229	0.459	0.233	2.13866e-72	1	PTCH1
MAF.1	2.80615e-74	-0.643158	0.228	0.496	9.41126e-70	1	MAF
NOP53	3.06672e-74	0.271187	0.842	0.652	1.02852e-69	1	NOP53
HOMER2.1	3.72747e-74	-0.492054	0.09	0.357	1.25012e-69	1	HOMER2
TMX1	7.89922e-74	0.325969	0.643	0.433	2.64924e-69	1	TMX1
MGARP	1.33407e-73	-0.489838	0.03	0.275	4.47421e-69	1	MGARP
DACH1	3.72415e-73	-0.594074	0.166	0.425	1.249e-68	1	DACH1
FZD2	1.55606e-71	0.323274	0.623	0.408	5.21871e-67	1	FZD2
TOMM20	2.52877e-71	0.27088	0.94	0.791	8.481e-67	1	TOMM20
CTGF	2.7283e-71	-1.26006	0.244	0.478	9.15018e-67	1	CTGF
PAK1	3.23685e-71	0.299123	0.54	0.328	1.08558e-66	1	PAK1
ZIC2	5.82554e-71	-0.469531	0.056	0.307	1.95377e-66	1	ZIC2
CNBP	1.01364e-70	0.262351	0.917	0.746	3.39955e-66	1	CNBP
LMAN1	4.69043e-70	-0.650017	0.478	0.661	1.57308e-65	1	LMAN1
COL25A1	6.6911e-70	-0.488824	0.021	0.252	2.24406e-65	1	COL25A1
FGFR3	8.92109e-70	0.315892	0.345	0.156	2.99195e-65	1	FGFR3
PBX1	4.34091e-69	0.260523	0.914	0.724	1.45585e-64	1	PBX1
DDAH2	6.69044e-69	-0.486601	0.634	0.77	2.24384e-64	1	DDAH2
FBL	1.43095e-68	0.261021	0.773	0.572	4.7991e-64	1	FBL
CAMK2N1.1	2.12379e-68	0.257315	0.68	0.433	7.12277e-64	1	CAMK2N1
AHNAK.1	3.24066e-68	-0.415248	0.048	0.289	1.08685e-63	1	AHNAK
CXXC5	6.01862e-68	-0.52615	0.285	0.54	2.01852e-63	1	CXXC5
TMSB15A	1.47124e-67	0.299723	0.913	0.704	4.93426e-63	1	TMSB15A
GABPB1-AS1.1	1.605e-67	0.270203	0.862	0.698	5.38283e-63	1	GABPB1-AS1
ZFHX4	2.10445e-67	-0.53243	0.385	0.615	7.05791e-63	1	ZFHX4
MSMO1	6.52981e-67	0.307416	0.665	0.447	2.18997e-62	1	MSMO1
ERICH5.1	7.70341e-67	-0.567286	0.034	0.262	2.58357e-62	1	ERICH5
NRIP1	8.41491e-67	-0.576419	0.489	0.676	2.82219e-62	1	NRIP1
PHGDH	8.4546e-67	0.281907	0.67	0.447	2.83551e-62	1	PHGDH
ZNF462.1	1.74143e-66	0.313312	0.793	0.616	5.8404e-62	1	ZNF462
INTU.1	1.8779e-66	0.277576	0.58	0.359	6.2981e-62	1	INTU
MAN1A1	2.26639e-66	-0.425107	0.079	0.325	7.60101e-62	1	MAN1A1
PNRC1	5.44652e-66	0.296647	0.778	0.581	1.82665e-61	1	PNRC1
ZFAS1	1.08956e-65	0.284001	0.972	0.837	3.65417e-61	1	ZFAS1
CLSTN2	1.23965e-65	-0.384608	0.031	0.257	4.15753e-61	1	CLSTN2
RIC3.1	2.39973e-65	0.279372	0.574	0.356	8.04822e-61	1	RIC3
CRB2	6.39133e-65	0.277877	0.604	0.395	2.14353e-60	1	CRB2
LMO1	6.75891e-65	0.297249	0.415	0.209	2.2668e-60	1	LMO1
TSPAN5	1.46662e-63	0.316394	0.432	0.239	4.91874e-59	1	TSPAN5
ZFP36L1	9.68627e-63	0.271635	0.93	0.674	3.24858e-58	1	ZFP36L1
RAB34.1	1.32763e-62	-0.424403	0.19	0.447	4.45259e-58	1	RAB34
SALL1	1.52748e-62	0.266987	0.383	0.193	5.12286e-58	1	SALL1
COL2A1.1	3.08249e-62	-0.816502	0.44	0.589	1.03381e-57	1	COL2A1
VMP1	5.0552e-62	-0.556225	0.323	0.55	1.69541e-57	1	VMP1
SAMD11	2.68111e-61	-0.361852	0.034	0.251	8.9919e-57	1	SAMD11
SPOCK1	1.01979e-60	-0.430621	0.055	0.279	3.42016e-56	1	SPOCK1
EPHA4	1.67456e-60	0.255676	0.525	0.305	5.61615e-56	1	EPHA4
ZMAT3	1.39998e-59	0.334279	0.354	0.174	4.69524e-55	1	ZMAT3
TOX3	3.16243e-59	0.28213	0.479	0.276	1.06062e-54	1	TOX3
PRSS23	4.07895e-59	-0.856059	0.239	0.45	1.368e-54	1	PRSS23
RNF130	5.24159e-59	0.273993	0.696	0.525	1.75792e-54	1	RNF130
SQLE.1	8.7431e-59	0.33431	0.788	0.61	2.93226e-54	1	SQLE
CPAMD8	4.04244e-58	-0.445626	0.052	0.265	1.35575e-53	1	CPAMD8
EGFR	1.44182e-57	-0.321752	0.066	0.291	4.83557e-53	1	EGFR
COL9A3	3.81105e-57	-0.525906	0.056	0.268	1.27815e-52	1	COL9A3
PAM.1	5.80911e-56	0.287687	0.494	0.307	1.94826e-51	1	PAM
EPB41L3	8.27512e-56	-0.310417	0.054	0.267	2.77531e-51	1	EPB41L3
KRT18.1	1.49314e-55	-0.51638	0.078	0.293	5.00768e-51	1	KRT18
STK39	7.615e-55	0.258382	0.395	0.22	2.55392e-50	1	STK39
TLN1	1.77442e-54	-0.391541	0.166	0.399	5.95104e-50	1	TLN1
FDPS	1.82006e-54	0.277479	0.822	0.655	6.10413e-50	1	FDPS
ALDH1A1.1	3.52513e-54	-1.78162	0.212	0.41	1.18226e-49	1	ALDH1A1
SOX4.1	1.29535e-53	-0.629839	0.879	0.878	4.34433e-49	1	SOX4
CDON	7.67282e-53	-0.424847	0.089	0.3	2.57331e-48	1	CDON
CELSR2.1	8.61653e-53	0.257688	0.481	0.296	2.88981e-48	1	CELSR2
SEMA5A	1.53319e-52	-0.520203	0.256	0.472	5.14201e-48	1	SEMA5A
FRZB	3.57297e-52	0.407582	0.334	0.17	1.1983e-47	1	FRZB
BTBD3	1.28593e-51	-0.36417	0.138	0.364	4.31277e-47	1	BTBD3
MYH9	1.46554e-51	-0.336001	0.146	0.377	4.91512e-47	1	MYH9
IFITM3	3.74932e-51	-0.801196	0.491	0.597	1.25745e-46	1	IFITM3
WASF1	1.23653e-50	0.274731	0.598	0.419	4.14708e-46	1	WASF1
KIAA1217	5.7741e-50	-0.530593	0.208	0.42	1.93652e-45	1	KIAA1217
TAGLN.1	6.81076e-50	-1.10692	0.199	0.4	2.28419e-45	1	TAGLN
PSD3	1.60645e-49	0.266975	0.445	0.272	5.3877e-45	1	PSD3
GRIA4	2.29589e-49	-0.390296	0.063	0.256	7.69995e-45	1	GRIA4
HES1	2.99525e-49	-0.734523	0.528	0.632	1.00455e-44	1	HES1
METRNL	1.00213e-48	-0.388447	0.192	0.414	3.36095e-44	1	METRNL
GFRA1	1.00517e-48	-0.298929	0.093	0.304	3.37115e-44	1	GFRA1
PAX6	1.20959e-48	-0.879988	0.385	0.525	4.05671e-44	1	PAX6
PLD3	2.58808e-48	-0.452013	0.611	0.721	8.67989e-44	1	PLD3
HIF1A.1	4.72001e-48	-0.494933	0.42	0.601	1.583e-43	1	HIF1A
PTPRD	5.08194e-47	-0.360139	0.174	0.393	1.70438e-42	1	PTPRD
MYL12B.1	2.95126e-46	-0.433231	0.699	0.76	9.89794e-42	1	MYL12B
PDLIM5	5.88272e-46	0.254716	0.55	0.383	1.97295e-41	1	PDLIM5
COTL1.1	6.12116e-46	-0.494539	0.549	0.67	2.05291e-41	1	COTL1
SIX3	6.24393e-46	-0.492802	0.627	0.711	2.09409e-41	1	SIX3
TUBB4B.1	6.92141e-46	-0.613759	0.591	0.702	2.3213e-41	1	TUBB4B
ZNF608	8.76214e-46	-0.357615	0.192	0.415	2.93865e-41	1	ZNF608
CDKN2D	7.96841e-45	-0.350771	0.085	0.275	2.67245e-40	1	CDKN2D
DSC2	1.00451e-44	-0.320261	0.12	0.322	3.36892e-40	1	DSC2
RFLNB.1	7.26565e-44	-0.351167	0.142	0.346	2.43675e-39	1	RFLNB
FNDC5	3.74647e-43	-0.391247	0.073	0.253	1.25649e-38	1	FNDC5
STON2	6.26605e-42	-0.250123	0.073	0.258	2.10151e-37	1	STON2
CTNNA2	8.473e-42	-0.311035	0.092	0.277	2.84167e-37	1	CTNNA2
VAMP3.1	2.01855e-41	-0.304863	0.139	0.341	6.76983e-37	1	VAMP3
CPE	4.26315e-41	-0.797412	0.636	0.693	1.42977e-36	1	CPE
FAM13C	4.91627e-40	-0.315055	0.11	0.297	1.64882e-35	1	FAM13C
NR2F6.1	5.40628e-40	-0.464445	0.415	0.592	1.81316e-35	1	NR2F6
MXRA7	7.25438e-40	-0.357432	0.313	0.511	2.43298e-35	1	MXRA7
ARID1B	2.60488e-39	-0.404287	0.371	0.557	8.73625e-35	1	ARID1B
GYG1.1	9.256e-39	-0.4008	0.157	0.342	3.10428e-34	1	GYG1
NAGK	9.50858e-39	-0.277552	0.126	0.317	3.18899e-34	1	NAGK
PHACTR2	1.72757e-38	-0.268019	0.098	0.282	5.79393e-34	1	PHACTR2
DUSP6	2.30962e-38	-0.373309	0.199	0.394	7.746e-34	1	DUSP6
CITED2	3.95743e-38	-0.365342	0.218	0.415	1.32724e-33	1	CITED2
CNN2	3.40678e-37	-0.372215	0.4	0.568	1.14257e-32	1	CNN2
PDLIM2	5.40088e-37	-0.327627	0.212	0.406	1.81135e-32	1	PDLIM2
APLP2.1	7.70015e-37	-0.431392	0.76	0.765	2.58248e-32	1	APLP2
FLRT3	9.08347e-37	-0.437544	0.202	0.385	3.04641e-32	1	FLRT3
LGR4	1.24369e-36	-0.338625	0.197	0.384	4.17109e-32	1	LGR4
PTN.1	1.2799e-36	-0.460855	0.174	0.358	4.29253e-32	1	PTN
CALD1.1	2.09256e-36	-0.581698	0.704	0.729	7.01804e-32	1	CALD1
EVA1B	2.76508e-36	-0.260233	0.104	0.278	9.27352e-32	1	EVA1B
ATP1B1	3.41865e-36	-0.40439	0.385	0.561	1.14655e-31	1	ATP1B1
ATP6V1G1	3.85065e-36	-0.33353	0.888	0.839	1.29143e-31	1	ATP6V1G1
RASSF4	6.04266e-36	-0.318623	0.136	0.315	2.02659e-31	1	RASSF4
PALLD	2.00295e-35	-0.426806	0.582	0.669	6.71749e-31	1	PALLD
TMSB10	2.06922e-35	-0.418212	0.985	0.939	6.93975e-31	1	TMSB10
QPRT.1	2.11446e-35	-0.396374	0.396	0.569	7.09149e-31	1	QPRT
KLF6	5.94938e-35	-0.421704	0.282	0.463	1.9953e-30	1	KLF6
COL9A1	7.12927e-35	-0.275429	0.093	0.257	2.39102e-30	1	COL9A1
EFHD2	1.60107e-34	-0.305375	0.131	0.306	5.36968e-30	1	EFHD2
TSPAN4	3.73027e-34	-0.299859	0.277	0.47	1.25106e-29	1	TSPAN4
CYBA	5.63874e-34	-0.338624	0.28	0.464	1.89112e-29	1	CYBA
SYT1.1	1.59919e-33	-0.568329	0.32	0.488	5.36336e-29	1	SYT1
GAS1	2.67028e-33	-0.487406	0.163	0.33	8.9556e-29	1	GAS1
ASCL1.1	3.01114e-33	0.263845	0.384	0.231	1.00987e-28	1	ASCL1
FOSB	3.44692e-33	-0.32343	0.1	0.261	1.15603e-28	1	FOSB
HSPA1A	4.14073e-33	-0.256879	0.155	0.34	1.38872e-28	1	HSPA1A
ACTN4	4.43299e-33	-0.366136	0.347	0.513	1.48673e-28	1	ACTN4
COL18A1	5.18752e-33	-0.347381	0.213	0.388	1.73979e-28	1	COL18A1
DCBLD2	1.2816e-32	-0.770636	0.649	0.69	4.29823e-28	1	DCBLD2
HIST1H4C	1.40487e-32	-1.01871	0.44	0.568	4.71165e-28	1	HIST1H4C
DUSP1	1.51835e-32	-0.366557	0.236	0.411	5.09223e-28	1	DUSP1
DAAM1.1	1.86453e-32	-0.428196	0.56	0.679	6.25325e-28	1	DAAM1
CRB1	3.44671e-32	-0.361924	0.15	0.314	1.15596e-27	1	CRB1
CDK1.1	5.53826e-32	-0.494536	0.111	0.259	1.85742e-27	1	CDK1
MAP2	7.12294e-32	-0.510113	0.522	0.646	2.38889e-27	1	MAP2
TPM1.1	7.6486e-32	-0.694268	0.839	0.815	2.56519e-27	1	TPM1
CSRP2.1	9.38702e-32	-0.453461	0.792	0.77	3.14822e-27	1	CSRP2
ZWINT.1	1.55786e-31	-0.306386	0.116	0.272	5.22474e-27	1	ZWINT
NUDT4.1	1.82399e-31	-0.398348	0.247	0.417	6.11729e-27	1	NUDT4
ITGB1	2.12005e-31	-0.34312	0.524	0.644	7.11021e-27	1	ITGB1
PLK2	3.14345e-31	-0.43646	0.187	0.353	1.05425e-26	1	PLK2
PRPSAP1	3.33454e-31	-0.352241	0.37	0.528	1.11834e-26	1	PRPSAP1
HTRA1	3.38246e-31	-0.312666	0.148	0.313	1.13441e-26	1	HTRA1
ENTPD4	5.73114e-31	-0.253036	0.145	0.317	1.92211e-26	1	ENTPD4
IER2.1	7.67004e-31	-0.433353	0.733	0.773	2.57238e-26	1	IER2
TRAF4	8.03352e-31	-0.276872	0.216	0.398	2.69428e-26	1	TRAF4
DYNLL1	8.49086e-31	-0.256068	0.921	0.872	2.84767e-26	1	DYNLL1
NKAIN4	9.75157e-31	-0.403124	0.36	0.516	3.27048e-26	1	NKAIN4
MT-CYB.1	1.40386e-30	-0.301967	0.991	0.942	4.70828e-26	1	MT-CYB
TUBB6	1.70787e-30	-0.270337	0.124	0.284	5.72784e-26	1	TUBB6
PHYHIPL	2.76318e-30	-0.331779	0.297	0.471	9.26717e-26	1	PHYHIPL
GPM6A	5.93915e-30	-0.412373	0.44	0.581	1.99187e-25	1	GPM6A
CIRBP	1.79316e-29	-0.268793	0.914	0.865	6.01391e-25	1	CIRBP
TLE4	3.78262e-29	-0.396609	0.37	0.535	1.26862e-24	1	TLE4
UACA	8.25721e-29	-0.406461	0.256	0.412	2.7693e-24	1	UACA
MYL12A.1	1.10049e-28	-0.366227	0.68	0.727	3.69083e-24	1	MYL12A
IER5L	1.50421e-27	-0.286804	0.211	0.38	5.04484e-23	1	IER5L
ATP6V0B	1.87355e-27	-0.307837	0.535	0.656	6.28353e-23	1	ATP6V0B
TOP2A	8.02728e-27	-0.965555	0.252	0.379	2.69219e-22	1	TOP2A
ITM2C	9.60311e-27	-0.344284	0.37	0.523	3.22069e-22	1	ITM2C
SLIT2	1.08918e-26	-0.29438	0.241	0.405	3.65289e-22	1	SLIT2
FIGN	4.05033e-26	-0.337493	0.234	0.392	1.3584e-21	1	FIGN
SUCO	1.18931e-25	-0.323914	0.432	0.572	3.9887e-21	1	SUCO
UBE2C.1	1.39692e-25	-0.687664	0.138	0.271	4.68498e-21	1	UBE2C
PPFIA1	1.45229e-25	-0.252661	0.232	0.403	4.87068e-21	1	PPFIA1
WASF2	1.78699e-25	-0.28078	0.301	0.469	5.99322e-21	1	WASF2
STMN2.1	2.49123e-25	-1.67619	0.148	0.27	8.35507e-21	1	STMN2
KLF3	2.52272e-25	-0.292124	0.25	0.414	8.4607e-21	1	KLF3
SCARB2	2.71692e-25	-0.304438	0.408	0.558	9.11201e-21	1	SCARB2
UBE2S	3.61133e-25	-0.403019	0.46	0.595	1.21117e-20	1	UBE2S
WEE1	3.99637e-25	-0.356059	0.308	0.46	1.3403e-20	1	WEE1
NECTIN2	8.50642e-25	-0.258559	0.301	0.462	2.85288e-20	1	NECTIN2
CD63	8.98253e-25	-0.273679	0.917	0.829	3.01256e-20	1	CD63
RTN4	1.67358e-24	-0.264891	0.955	0.868	5.61285e-20	1	RTN4
PLPP3	3.69363e-24	-0.316243	0.226	0.373	1.23877e-19	1	PLPP3
NUSAP1.1	4.18725e-24	-0.657556	0.21	0.332	1.40432e-19	1	NUSAP1
CKAP2	4.45649e-24	-0.408332	0.242	0.38	1.49462e-19	1	CKAP2
PLPPR3.1	4.64082e-24	-0.287103	0.506	0.644	1.55644e-19	1	PLPPR3
CCNB1	9.5816e-24	-0.547794	0.141	0.275	3.21348e-19	1	CCNB1
SH3BGRL3.1	1.44274e-23	-0.43404	0.702	0.74	4.83867e-19	1	SH3BGRL3
ARL6IP1	5.03543e-23	-0.404757	0.499	0.629	1.68878e-18	1	ARL6IP1
RCAN1.1	5.85978e-22	-0.414962	0.128	0.252	1.96525e-17	1	RCAN1
VCL	2.6841e-21	-0.265816	0.267	0.408	9.00195e-17	1	VCL
JUNB	3.05836e-21	-0.322301	0.356	0.497	1.02571e-16	1	JUNB
TP53I11	3.40554e-21	-0.304147	0.198	0.335	1.14215e-16	1	TP53I11
GJA1	6.66488e-21	-0.311295	0.164	0.295	2.23527e-16	1	GJA1
FOXP1	1.40159e-20	-0.275223	0.384	0.525	4.70064e-16	1	FOXP1
TAGLN3.1	1.85204e-20	-0.488902	0.18	0.301	6.21137e-16	1	TAGLN3
ZIC1	1.92982e-20	-0.254492	0.154	0.284	6.47224e-16	1	ZIC1
ASPM.1	1.95413e-20	-0.567143	0.15	0.264	6.55378e-16	1	ASPM
ISYNA1.1	2.56274e-20	-0.310287	0.697	0.722	8.59491e-16	1	ISYNA1
SERINC1	6.95135e-20	-0.273633	0.417	0.553	2.33134e-15	1	SERINC1
TPX2	1.44828e-19	-0.525448	0.174	0.285	4.85723e-15	1	TPX2
RHOB	1.8056e-19	-0.327227	0.275	0.407	6.05561e-15	1	RHOB
FSTL1	1.94654e-19	-0.312524	0.322	0.447	6.52831e-15	1	FSTL1
DBN1	2.83752e-19	-0.271249	0.604	0.674	9.51646e-15	1	DBN1
MSI2	5.77978e-19	-0.302557	0.731	0.753	1.93842e-14	1	MSI2
CDH11	1.89657e-18	-0.416828	0.284	0.391	6.36073e-14	1	CDH11
RBFOX2	2.47114e-18	-0.27246	0.361	0.504	8.28772e-14	1	RBFOX2
APLP1.1	7.28446e-18	-0.289809	0.363	0.496	2.44306e-13	1	APLP1
PBRM1	1.01148e-16	-0.254121	0.515	0.63	3.39229e-12	1	PBRM1
LAPTM4A	3.56341e-16	-0.252505	0.691	0.707	1.1951e-11	1	LAPTM4A
GSTP1.1	9.91514e-16	-0.269948	0.984	0.923	3.32534e-11	1	GSTP1
SPARC	2.13292e-15	-0.398918	0.882	0.74	7.15337e-11	1	SPARC
KTN1.1	3.01374e-15	-0.28486	0.691	0.702	1.01075e-10	1	KTN1
KIF20B	3.33832e-15	-0.312195	0.197	0.3	1.11961e-10	1	KIF20B
GULP1	3.72091e-15	-0.321144	0.372	0.475	1.24792e-10	1	GULP1
FAT1.1	8.85984e-15	-0.310923	0.483	0.562	2.97141e-10	1	FAT1
NCAM1.1	2.88461e-14	-0.297306	0.497	0.59	9.6744e-10	1	NCAM1
UBE2T.1	2.92475e-14	-0.360421	0.288	0.377	9.80903e-10	1	UBE2T
MKI67	3.67491e-14	-0.549173	0.22	0.31	1.23249e-09	1	MKI67
TOX.1	4.30241e-14	-0.27356	0.253	0.36	1.44294e-09	1	TOX
ENC1	5.30467e-14	-0.371896	0.257	0.358	1.77908e-09	1	ENC1
RARRES2	8.24333e-14	-0.337003	0.318	0.413	2.76465e-09	1	RARRES2
POLR2L	8.94836e-14	-0.252425	0.55	0.618	3.0011e-09	1	POLR2L
RND3	1.11537e-13	-0.445384	0.514	0.571	3.74073e-09	1	RND3
KIDINS220.1	1.77204e-13	-0.292927	0.533	0.618	5.94307e-09	1	KIDINS220
NEAT1.1	2.84675e-13	-0.498809	0.594	0.637	9.54742e-09	1	NEAT1
MAD2L1	4.71338e-13	-0.37364	0.3	0.376	1.58077e-08	1	MAD2L1
MIS18BP1	2.49031e-12	-0.380066	0.292	0.377	8.35201e-08	1	MIS18BP1
CENPU	2.88224e-11	-0.264775	0.249	0.334	9.66646e-07	1	CENPU
FOS.1	1.72203e-10	-0.324009	0.693	0.704	5.77535e-06	1	FOS
DKK3	3.10201e-10	-0.321967	0.512	0.555	1.04035e-05	1	DKK3
EFNA5	5.99817e-10	-0.269057	0.412	0.488	2.01167e-05	1	EFNA5
HIST1H1E	9.08365e-10	-0.292934	0.448	0.519	3.04648e-05	1	HIST1H1E
ANK3.1	6.544e-09	-0.267139	0.284	0.37	0.000219473	1	ANK3
CYR61	7.01108e-09	-0.459691	0.695	0.637	0.000235138	1	CYR61
NPC2	1.04297e-08	-0.280752	0.721	0.674	0.000349791	1	NPC2
HMGB2.1	1.08525e-08	-0.490311	0.629	0.624	0.000363971	1	HMGB2
AKAP12.1	3.11021e-08	-0.503824	0.731	0.698	0.0010431	1	AKAP12
DNAJC1	4.30927e-08	-0.252511	0.624	0.647	0.00144524	1	DNAJC1
MIAT.1	7.01312e-08	-0.329482	0.543	0.424	0.00235206	1	MIAT
PCLAF.1	7.56237e-08	-0.363648	0.276	0.334	0.00253627	1	PCLAF
HIST1H1C	1.32267e-07	-0.348229	0.41	0.467	0.00443596	1	HIST1H1C
FAM92A.1	5.03782e-07	-0.276395	0.465	0.529	0.0168958	1	FAM92A
PRDX6.1	5.25674e-07	-0.253529	0.86	0.764	0.01763	1	PRDX6
GADD45A	2.78322e-06	-0.302816	0.216	0.285	0.0933437	1	GADD45A
SMC4	1.62219e-05	-0.406406	0.431	0.444	0.54405	1	SMC4
DST.1	2.10187e-05	-0.275885	0.534	0.577	0.704924	1	DST
TERF2IP	5.15895e-05	-0.291631	0.583	0.618	1	1	TERF2IP
CLU	6.39439e-05	-0.345058	0.642	0.634	1	1	CLU
KPNA2	0.000143654	-0.393396	0.559	0.587	1	1	KPNA2
GAP43.1	0.000322105	-0.378504	0.383	0.314	1	1	GAP43
TYMS.1	0.00102133	-0.322772	0.486	0.478	1	1	TYMS
RTN1.1	0.00293409	-0.421346	0.271	0.303	1	1	RTN1
DIO3	0.00504801	-0.341069	0.402	0.408	1	1	DIO3
B2M.1	0.00551155	-0.25181	0.62	0.592	1	1	B2M
CP.1	0	1.55831	0.984	0.293	0	2	CP
CDH6.1	0	1.51978	0.993	0.408	0	2	CDH6
CYP1B1.2	0	1.45689	0.972	0.441	0	2	CYP1B1
LEFTY2	0	1.30933	0.596	0.102	0	2	LEFTY2
CRABP1.2	0	1.24451	1	0.833	0	2	CRABP1
DAPL1.2	0	1.24025	0.999	0.52	0	2	DAPL1
S1PR3.1	0	1.23203	0.926	0.231	0	2	S1PR3
CPE.1	0	1.1893	0.992	0.655	0	2	CPE
COL9A3.1	0	1.15932	0.803	0.186	0	2	COL9A3
SFRP2.1	0	1.14485	1	0.755	0	2	SFRP2
CDH11.1	0	1.12283	0.921	0.322	0	2	CDH11
HMX1.2	0	1.12009	0.989	0.415	0	2	HMX1
PLP1.1	0	1.09528	0.817	0.21	0	2	PLP1
COL2A1.2	0	1.07244	0.987	0.529	0	2	COL2A1
RAX.1	0	1.05575	0.933	0.263	0	2	RAX
SELENOP.2	0	1.04398	0.934	0.355	0	2	SELENOP
SLC15A3	0	1.03745	0.744	0.156	0	2	SLC15A3
RAB31.2	0	1.03109	0.984	0.492	0	2	RAB31
IFITM2.2	0	1.00105	0.975	0.584	0	2	IFITM2
SIX6.2	0	0.980211	0.984	0.496	0	2	SIX6
PKDCC.1	0	0.964379	0.934	0.392	0	2	PKDCC
SEMA5A.1	0	0.958226	0.907	0.399	0	2	SEMA5A
PAX2	0	0.930533	0.769	0.169	0	2	PAX2
COL25A1.1	0	0.919706	0.753	0.17	0	2	COL25A1
PRSS35	0	0.892763	0.532	0.105	0	2	PRSS35
IFITM1	0	0.871443	0.698	0.113	0	2	IFITM1
KIAA1217.1	0	0.865051	0.871	0.347	0	2	KIAA1217
FAM69C	0	0.858157	0.729	0.105	0	2	FAM69C
MAFB	0	0.838899	0.616	0.142	0	2	MAFB
LIM2	0	0.835178	0.642	0.11	0	2	LIM2
CPAMD8.1	0	0.832122	0.691	0.194	0	2	CPAMD8
LRP1B	0	0.81175	0.612	0.135	0	2	LRP1B
CRB1.1	0	0.807637	0.768	0.247	0	2	CRB1
FGF9	0	0.784669	0.69	0.161	0	2	FGF9
PTH2	0	0.770833	0.619	0.126	0	2	PTH2
GPR37	0	0.752802	0.639	0.144	0	2	GPR37
PRELP	0	0.645584	0.484	0.065	0	2	PRELP
ARHGEF26	0	0.623939	0.618	0.143	0	2	ARHGEF26
COL13A1	0	0.623443	0.475	0.06	0	2	COL13A1
CRYM	0	0.603573	0.565	0.095	0	2	CRYM
LHX9	0	0.580079	0.439	0.037	0	2	LHX9
NGFR	0	0.455969	0.364	0.041	0	2	NGFR
ENC1.1	3.20045e-306	0.920176	0.797	0.3	1.07337e-301	2	ENC1
CLEC18C	5.75618e-306	0.570004	0.433	0.065	1.93051e-301	2	CLEC18C
CDON.1	1.12648e-298	0.735634	0.74	0.228	3.778e-294	2	CDON
SPINT2.1	1.91463e-294	0.843509	0.941	0.508	6.42129e-290	2	SPINT2
PLPP3.1	7.90642e-290	0.784622	0.809	0.309	2.65165e-285	2	PLPP3
DIO3.1	3.32028e-286	1.00025	0.868	0.359	1.11355e-281	2	DIO3
FRRS1L	1.87913e-285	0.697113	0.602	0.15	6.30221e-281	2	FRRS1L
AHNAK.2	2.82384e-279	0.813768	0.687	0.217	9.4706e-275	2	AHNAK
MDK.1	4.70509e-271	0.679258	1	0.902	1.57799e-266	2	MDK
LINC01833.1	1.06421e-269	0.77791	0.928	0.498	3.56914e-265	2	LINC01833
MXRA8	5.21378e-265	0.645556	0.544	0.132	1.7486e-260	2	MXRA8
SORCS1	9.69355e-263	0.656865	0.6	0.165	3.25102e-258	2	SORCS1
CLU.1	3.7717e-262	0.97893	0.939	0.603	1.26495e-257	2	CLU
MAF.2	3.71754e-260	0.781745	0.882	0.422	1.24679e-255	2	MAF
GAS1.1	4.66025e-260	0.775453	0.754	0.265	1.56296e-255	2	GAS1
METRN	4.92458e-259	0.723194	0.997	0.781	1.65161e-254	2	METRN
GPM6B	6.45505e-255	0.823424	0.935	0.562	2.1649e-250	2	GPM6B
PRSS23.1	7.13146e-251	0.735306	0.889	0.378	2.39175e-246	2	PRSS23
DTX4	1.01338e-250	0.686472	0.751	0.291	3.39867e-246	2	DTX4
CALM2.2	6.07512e-247	0.623985	1	0.948	2.03747e-242	2	CALM2
SPHK1.2	8.33998e-245	0.607044	0.754	0.266	2.79706e-240	2	SPHK1
FABP7	1.20276e-240	0.847639	0.818	0.375	4.03382e-236	2	FABP7
FAM13C.1	6.02375e-240	0.596262	0.684	0.233	2.02025e-235	2	FAM13C
FAM92A.2	6.06759e-238	0.740583	0.862	0.487	2.03495e-233	2	FAM92A
SOX9	1.53191e-237	0.824853	0.869	0.447	5.13771e-233	2	SOX9
HPD	1.74901e-237	0.303815	0.271	0.028	5.86583e-233	2	HPD
SFRP1.2	2.02292e-232	0.806797	0.976	0.612	6.78446e-228	2	SFRP1
IFITM3.1	6.74717e-232	0.79557	0.938	0.548	2.26287e-227	2	IFITM3
WFIKKN1	8.04362e-230	0.442206	0.388	0.07	2.69767e-225	2	WFIKKN1
TP53I11.1	1.09429e-225	0.718734	0.702	0.279	3.67004e-221	2	TP53I11
GSN	9.22145e-225	0.530814	0.452	0.102	3.09269e-220	2	GSN
ARL4C.2	3.19248e-223	0.767222	0.947	0.615	1.07069e-218	2	ARL4C
OAF	5.06822e-221	0.588341	0.595	0.19	1.69978e-216	2	OAF
FZD5	1.70423e-218	0.705982	0.93	0.537	5.71566e-214	2	FZD5
PLD3.1	1.80556e-218	0.6695	0.964	0.682	6.05548e-214	2	PLD3
PLXDC2	3.57895e-218	0.677859	0.768	0.336	1.20031e-213	2	PLXDC2
SPARC.1	8.38022e-215	0.699962	0.994	0.731	2.81056e-210	2	SPARC
FGF8	1.77223e-213	0.46581	0.381	0.07	5.94372e-209	2	FGF8
TMEM63A	7.25945e-213	0.42625	0.35	0.061	2.43468e-208	2	TMEM63A
NR2F6.2	9.39972e-213	0.619806	0.893	0.538	3.15248e-208	2	NR2F6
MPZ	2.47564e-212	0.398038	0.273	0.034	8.3028e-208	2	MPZ
TMSB4X	2.68533e-210	-0.843575	0.991	0.969	9.00606e-206	2	TMSB4X
NRIP1.1	5.40065e-209	0.710137	0.93	0.626	1.81127e-204	2	NRIP1
F10	3.66173e-207	0.337486	0.263	0.032	1.22807e-202	2	F10
COL18A1.1	2.5615e-205	0.634346	0.75	0.328	8.59077e-201	2	COL18A1
TRNP1	2.56838e-205	0.465522	0.48	0.126	8.61383e-201	2	TRNP1
DNAJC1.1	4.36088e-205	0.633003	0.929	0.615	1.46255e-200	2	DNAJC1
DKK3.1	8.94108e-203	0.627251	0.9	0.514	2.99866e-198	2	DKK3
GPM6A.1	9.98514e-202	0.660296	0.898	0.53	3.34882e-197	2	GPM6A
PTMA	4.87363e-201	-0.539908	1	0.981	1.63452e-196	2	PTMA
VSX2	7.64751e-200	0.478531	0.59	0.182	2.56482e-195	2	VSX2
YBX1.1	7.87925e-199	-0.601499	0.978	0.935	2.64254e-194	2	YBX1
RTN4.1	2.10743e-194	0.576132	0.995	0.866	7.06791e-190	2	RTN4
FAT1.2	2.41348e-193	0.672266	0.884	0.518	8.09432e-189	2	FAT1
MOB3B	6.2847e-193	0.567571	0.691	0.297	2.10776e-188	2	MOB3B
IER2.2	1.18997e-191	0.665555	0.979	0.746	3.99092e-187	2	IER2
LMAN1.1	1.96732e-191	0.623367	0.948	0.608	6.59801e-187	2	LMAN1
HMGB1.1	2.48176e-191	-0.791822	0.983	0.953	8.32331e-187	2	HMGB1
FOS.2	3.2685e-191	0.758839	0.984	0.674	1.09619e-186	2	FOS
MAB21L1.1	9.53152e-190	0.61629	0.862	0.368	3.19668e-185	2	MAB21L1
SEMA3A.1	4.95135e-187	0.53836	0.686	0.263	1.66058e-182	2	SEMA3A
TMSB10.1	1.39139e-186	-0.845681	0.959	0.943	4.66644e-182	2	TMSB10
VIPR2	1.90319e-182	0.407336	0.372	0.08	6.38293e-178	2	VIPR2
FIGN.1	2.07798e-182	0.557814	0.733	0.337	6.96913e-178	2	FIGN
PPIC	4.65259e-182	0.468391	0.482	0.141	1.56039e-177	2	PPIC
ARHGAP29	7.39749e-182	0.503491	0.48	0.138	2.48097e-177	2	ARHGAP29
TBX2.2	1.30594e-180	0.481638	0.651	0.232	4.37985e-176	2	TBX2
TMSB15A.1	3.97105e-180	-0.992596	0.376	0.764	1.33181e-175	2	TMSB15A
PTPRJ	5.87669e-180	0.435433	0.438	0.117	1.97093e-175	2	PTPRJ
RASSF4.1	1.36381e-179	0.551406	0.64	0.259	4.57393e-175	2	RASSF4
RARRES2.1	3.75604e-177	0.568154	0.779	0.363	1.2597e-172	2	RARRES2
GULP1.1	4.40414e-177	0.560639	0.821	0.426	1.47706e-172	2	GULP1
GRB10	1.97451e-176	0.52011	0.619	0.241	6.62213e-172	2	GRB10
TUBB2B.1	3.21473e-175	-1.00773	0.871	0.913	1.07816e-170	2	TUBB2B
DUSP6.1	9.64034e-175	0.630627	0.727	0.335	3.23318e-170	2	DUSP6
SEMA6A.1	7.24402e-173	0.621016	0.854	0.474	2.4295e-168	2	SEMA6A
BAZ2B	1.09927e-171	0.610293	0.939	0.7	3.68672e-167	2	BAZ2B
JUN	2.07789e-171	0.724219	0.905	0.578	6.96884e-167	2	JUN
FOSB.1	5.03184e-171	0.608265	0.578	0.208	1.68758e-166	2	FOSB
DOC2B	1.07939e-168	0.450103	0.449	0.128	3.62007e-164	2	DOC2B
CDKN1C.1	2.10311e-168	0.62433	0.9	0.567	7.0534e-164	2	CDKN1C
SORBS2	3.07672e-167	0.561193	0.732	0.36	1.03187e-162	2	SORBS2
CDH2.1	6.70836e-167	0.560475	0.985	0.812	2.24985e-162	2	CDH2
TUBB	1.13615e-166	-0.606193	0.968	0.944	3.81043e-162	2	TUBB
LINC01551.2	3.43022e-166	-1.49052	0.121	0.58	1.15043e-161	2	LINC01551
ZFP36L1.1	1.15393e-165	0.639197	0.969	0.675	3.87006e-161	2	ZFP36L1
WEE1.1	1.67127e-165	0.672684	0.761	0.41	5.6051e-161	2	WEE1
RCAN1.2	5.72731e-161	0.831558	0.545	0.206	1.92083e-156	2	RCAN1
CCND1	7.48566e-161	0.56662	0.981	0.737	2.51054e-156	2	CCND1
PCDH7.2	1.86727e-160	0.534695	0.879	0.452	6.26244e-156	2	PCDH7
TUBA1B.1	6.54204e-159	-1.04574	0.94	0.933	2.19407e-154	2	TUBA1B
DIO3OS	1.23919e-158	0.452155	0.563	0.207	4.156e-154	2	DIO3OS
ITM2B	7.31596e-155	0.519185	0.969	0.79	2.45363e-150	2	ITM2B
EFNB2	1.32153e-154	0.848537	0.787	0.453	4.43215e-150	2	EFNB2
H2AFZ.1	2.03195e-153	-0.861902	0.93	0.923	6.81476e-149	2	H2AFZ
JPT1	9.59561e-153	-0.880561	0.659	0.829	3.21817e-148	2	JPT1
LGR4.1	5.57528e-152	0.534856	0.692	0.328	1.86984e-147	2	LGR4
SLC30A10	8.61145e-151	0.323862	0.313	0.068	2.88811e-146	2	SLC30A10
FBN1	7.38381e-150	0.499773	0.511	0.181	2.47638e-145	2	FBN1
ITM2C.1	2.05063e-149	0.588033	0.798	0.476	6.87741e-145	2	ITM2C
DACH1.1	8.93394e-149	0.49	0.763	0.358	2.99627e-144	2	DACH1
RHOB.1	2.08427e-148	0.647126	0.701	0.36	6.99022e-144	2	RHOB
ID2.2	2.90472e-148	0.60684	0.855	0.488	9.74186e-144	2	ID2
SHROOM4	2.90232e-147	0.369147	0.351	0.088	9.73381e-143	2	SHROOM4
PALLD.1	4.77776e-147	0.532796	0.921	0.632	1.60237e-142	2	PALLD
CHST2	1.06983e-146	0.425612	0.489	0.162	3.588e-142	2	CHST2
CTGF.1	2.71196e-145	0.804605	0.799	0.415	9.09536e-141	2	CTGF
CNN3.1	5.72556e-145	0.464661	0.975	0.785	1.92024e-140	2	CNN3
MLEC	1.3328e-143	0.552502	0.89	0.625	4.46996e-139	2	MLEC
RUNX1	4.79547e-143	0.270916	0.256	0.046	1.6083e-138	2	RUNX1
TSPAN18	2.62152e-142	0.468478	0.596	0.259	8.79207e-138	2	TSPAN18
MYLK	1.14014e-141	0.501226	0.435	0.138	3.82381e-137	2	MYLK
SIX3.1	5.50901e-141	0.504027	0.937	0.677	1.84761e-136	2	SIX3
FOXG1.2	5.27801e-140	-0.969785	0.101	0.53	1.77014e-135	2	FOXG1
CDK6	6.44747e-139	0.475413	0.618	0.274	2.16235e-134	2	CDK6
PRTG	1.9502e-137	0.495591	0.528	0.209	6.54057e-133	2	PRTG
ADARB1	2.04005e-137	0.433504	0.497	0.183	6.84192e-133	2	ADARB1
DUSP1.1	3.28677e-137	0.607542	0.693	0.36	1.10232e-132	2	DUSP1
CENPV.1	1.51359e-135	-0.859344	0.478	0.743	5.07629e-131	2	CENPV
CDH20	3.19097e-134	0.389604	0.393	0.119	1.07019e-129	2	CDH20
HIF1A.2	3.78866e-134	0.493565	0.859	0.552	1.27064e-129	2	HIF1A
ZNF215	9.51355e-134	0.34113	0.306	0.072	3.19065e-129	2	ZNF215
CNTN5	1.16659e-133	0.41417	0.427	0.139	3.91251e-129	2	CNTN5
CYR61.1	3.43258e-133	0.705764	0.915	0.616	1.15122e-128	2	CYR61
NKAIN4.1	3.44759e-133	0.455259	0.822	0.465	1.15625e-128	2	NKAIN4
MGST1.1	4.21021e-133	-1.01592	0.148	0.551	1.41202e-128	2	MGST1
GPX3	1.16769e-130	0.424699	0.364	0.101	3.91619e-126	2	GPX3
CA2	3.3501e-130	0.474681	0.536	0.219	1.12356e-125	2	CA2
THSD4	1.321e-129	0.432853	0.362	0.101	4.43038e-125	2	THSD4
HES1.1	5.01323e-129	0.52577	0.926	0.589	1.68134e-124	2	HES1
ZIC2.1	1.30518e-128	0.483415	0.586	0.246	4.37733e-124	2	ZIC2
TBX2-AS1	5.05395e-127	0.376961	0.497	0.181	1.69499e-122	2	TBX2-AS1
CEMIP2	8.49475e-127	0.502332	0.628	0.303	2.84897e-122	2	CEMIP2
TBC1D9	3.0721e-126	0.512622	0.543	0.237	1.03032e-121	2	TBC1D9
CLRN1	1.35012e-125	0.42896	0.49	0.184	4.52804e-121	2	CLRN1
PLEKHG1	1.37577e-125	0.450842	0.601	0.284	4.61404e-121	2	PLEKHG1
METRNL.1	3.1592e-125	0.430326	0.692	0.358	1.05953e-120	2	METRNL
KDELR1	4.2641e-125	0.424885	0.957	0.778	1.43009e-120	2	KDELR1
SPOCK2	3.32513e-124	0.317656	0.32	0.083	1.11518e-119	2	SPOCK2
CYBA.1	3.41878e-124	0.444069	0.731	0.413	1.14659e-119	2	CYBA
MARCH3	5.92724e-124	0.39864	0.504	0.195	1.98788e-119	2	MARCH3
LIMCH1.1	6.52025e-124	0.51958	0.751	0.427	2.18676e-119	2	LIMCH1
BMP4	1.43624e-122	0.408241	0.38	0.114	4.81685e-118	2	BMP4
JUNB.1	3.12929e-122	0.465742	0.787	0.449	1.0495e-117	2	JUNB
WFDC2	2.05151e-121	0.488422	0.467	0.177	6.88034e-117	2	WFDC2
SOD1	1.78535e-120	0.41369	0.954	0.781	5.9877e-116	2	SOD1
CRYBB3	3.13497e-120	0.341253	0.394	0.123	1.05141e-115	2	CRYBB3
LDHB.1	1.72305e-119	-0.453876	0.963	0.908	5.77877e-115	2	LDHB
NDP	2.09827e-119	0.323914	0.318	0.084	7.03716e-115	2	NDP
KLF6.1	1.09095e-118	0.562828	0.723	0.414	3.65882e-114	2	KLF6
LCTL	3.80758e-118	0.283074	0.306	0.079	1.27699e-113	2	LCTL
EPHX1	6.76246e-118	0.324873	0.311	0.084	2.26799e-113	2	EPHX1
ZNF608.1	1.44089e-117	0.434407	0.678	0.36	4.83246e-113	2	ZNF608
HEPH	2.25864e-117	0.418722	0.496	0.206	7.57501e-113	2	HEPH
MT-CYB.2	1.09843e-116	0.422558	0.999	0.942	3.68392e-112	2	MT-CYB
CDC42EP3	2.31306e-115	0.493203	0.509	0.219	7.75753e-111	2	CDC42EP3
MAP2.1	6.91313e-115	0.383988	0.883	0.606	2.31853e-110	2	MAP2
FBN2.1	8.09026e-115	0.456268	0.633	0.305	2.71331e-110	2	FBN2
CKB.1	8.98901e-115	-0.776017	0.99	0.935	3.01473e-110	2	CKB
PLTP	4.16308e-113	0.427865	0.636	0.327	1.39621e-108	2	PLTP
PDE6B	1.2115e-112	0.272517	0.298	0.079	4.06314e-108	2	PDE6B
ETV5	1.75346e-112	0.356239	0.452	0.172	5.88075e-108	2	ETV5
CNTN3	2.51854e-112	0.29042	0.269	0.065	8.44667e-108	2	CNTN3
TNS3	5.59501e-112	0.360195	0.452	0.175	1.87645e-107	2	TNS3
CST3	5.8156e-112	0.448174	0.882	0.645	1.95044e-107	2	CST3
IL17RD	8.77937e-112	0.429014	0.539	0.244	2.94443e-107	2	IL17RD
MXRA7.1	3.83831e-111	0.418175	0.759	0.461	1.28729e-106	2	MXRA7
TOX.2	8.34125e-110	0.375364	0.641	0.317	2.79749e-105	2	TOX
CALCOCO1	5.94877e-109	0.391918	0.5	0.211	1.9951e-104	2	CALCOCO1
MT-ND3.1	8.86177e-108	0.399535	0.997	0.874	2.97206e-103	2	MT-ND3
FAM111A	2.87824e-105	0.376903	0.455	0.183	9.65305e-101	2	FAM111A
GRINA	6.16929e-105	0.419112	0.693	0.406	2.06906e-100	2	GRINA
LIX1	1.07156e-104	0.464638	0.786	0.476	3.59379e-100	2	LIX1
LAMB2	1.3824e-103	0.357989	0.401	0.149	4.63629e-99	2	LAMB2
KAZN	3.94652e-103	0.392208	0.499	0.221	1.32358e-98	2	KAZN
CLEC18A	4.00139e-103	0.260242	0.262	0.065	1.34199e-98	2	CLEC18A
TRIB2	4.93916e-103	0.397051	0.632	0.336	1.6565e-98	2	TRIB2
APOE.2	1.33459e-102	0.440501	0.693	0.358	4.47593e-98	2	APOE
AC092958.1	9.64545e-102	0.299753	0.36	0.121	3.23489e-97	2	AC092958.1
KITLG	7.00283e-100	0.323621	0.352	0.117	2.34861e-95	2	KITLG
ARID1B.1	9.66578e-100	0.419042	0.781	0.51	3.24171e-95	2	ARID1B
SEC11C	2.07121e-99	0.392763	0.839	0.582	6.94641e-95	2	SEC11C
KCNJ13	3.09466e-99	0.25415	0.261	0.068	1.03789e-94	2	KCNJ13
XKR4	7.4887e-99	0.288812	0.255	0.064	2.51156e-94	2	XKR4
GPC4	3.85233e-98	0.387707	0.697	0.384	1.292e-93	2	GPC4
EGFR.1	9.94136e-98	0.382158	0.523	0.239	3.33413e-93	2	EGFR
EGR1.1	1.97625e-97	0.441931	0.936	0.646	6.62795e-93	2	EGR1
PARD3B	4.95803e-96	0.336776	0.456	0.195	1.66282e-91	2	PARD3B
SUCO.1	1.66819e-95	0.395715	0.802	0.531	5.59476e-91	2	SUCO
LUZP1	4.35471e-95	0.409299	0.638	0.365	1.46048e-90	2	LUZP1
PTPRA	1.10731e-94	0.404563	0.763	0.515	3.71369e-90	2	PTPRA
SIX3-AS1	1.38395e-94	0.294723	0.396	0.149	4.64148e-90	2	SIX3-AS1
RAN	1.46212e-94	-0.465322	0.938	0.894	4.90367e-90	2	RAN
TRH	1.35503e-93	0.349429	0.456	0.183	4.54449e-89	2	TRH
VMP1.1	4.36825e-93	0.486112	0.759	0.5	1.46502e-88	2	VMP1
FRZB.1	4.79918e-93	0.282713	0.43	0.163	1.60955e-88	2	FRZB
NAV2	1.013e-92	0.307984	0.313	0.1	3.3974e-88	2	NAV2
ZHX2	4.01156e-92	0.290639	0.312	0.1	1.3454e-87	2	ZHX2
PSAP	5.32877e-92	0.371297	0.889	0.663	1.78716e-87	2	PSAP
SPP1	7.83986e-92	0.273971	0.298	0.089	2.62933e-87	2	SPP1
CRMP1.1	1.32265e-91	-0.70622	0.215	0.551	4.4359e-87	2	CRMP1
TENM4	2.79609e-91	0.406229	0.451	0.203	9.37753e-87	2	TENM4
ARL6IP5	3.15516e-91	0.375607	0.87	0.634	1.05818e-86	2	ARL6IP5
ID1.2	4.34462e-91	0.425666	0.799	0.472	1.4571e-86	2	ID1
CNTN4	5.14341e-91	0.367145	0.397	0.157	1.725e-86	2	CNTN4
MAN1A1.1	1.37211e-90	0.370347	0.561	0.27	4.60177e-86	2	MAN1A1
OAZ2	2.72287e-90	0.344832	0.723	0.465	9.13196e-86	2	OAZ2
BOC	4.62742e-90	0.413099	0.484	0.227	1.55194e-85	2	BOC
CD24.1	8.22316e-90	-0.704944	0.624	0.793	2.75788e-85	2	CD24
FABP5.1	1.29465e-89	-0.775776	0.562	0.753	4.34199e-85	2	FABP5
PGGHG	1.75288e-89	0.304136	0.32	0.108	5.87882e-85	2	PGGHG
TM7SF2	5.28329e-89	0.382932	0.632	0.367	1.77191e-84	2	TM7SF2
HES4.1	5.58487e-89	-0.749052	0.399	0.663	1.87305e-84	2	HES4
MRC2	1.05472e-88	0.414436	0.493	0.238	3.53731e-84	2	MRC2
PRPSAP1.1	1.52857e-88	0.335635	0.751	0.485	5.12653e-84	2	PRPSAP1
PDIA3	4.29514e-88	0.39377	0.935	0.725	1.4405e-83	2	PDIA3
PRDX6.2	1.14359e-87	0.370771	0.945	0.757	3.83538e-83	2	PRDX6
VCAN.2	3.00476e-87	-0.768323	0.222	0.55	1.00774e-82	2	VCAN
APLP2.2	5.47118e-87	0.321411	0.951	0.745	1.83492e-82	2	APLP2
UACA.1	6.15485e-87	0.437304	0.654	0.368	2.06421e-82	2	UACA
GNAS	1.60539e-86	-0.360672	0.998	0.958	5.38416e-82	2	GNAS
PCDH11X	1.8934e-86	0.35859	0.389	0.153	6.35008e-82	2	PCDH11X
EGR3	2.2061e-86	0.445967	0.447	0.197	7.39882e-82	2	EGR3
ZEB2	7.20275e-86	0.424913	0.724	0.47	2.41566e-81	2	ZEB2
HNRNPA1.1	1.59979e-85	-0.337966	0.99	0.948	5.36538e-81	2	HNRNPA1
CCL2	2.47095e-85	0.293837	0.408	0.165	8.28708e-81	2	CCL2
LMO4	9.29065e-85	-0.685324	0.291	0.585	3.1159e-80	2	LMO4
KCNQ1OT1.1	1.50369e-84	0.448832	0.928	0.71	5.04309e-80	2	KCNQ1OT1
PTPRG	1.69047e-84	0.364273	0.574	0.306	5.66951e-80	2	PTPRG
LRP1.1	2.05578e-84	0.405344	0.561	0.304	6.89469e-80	2	LRP1
VWA1	2.06852e-84	0.26411	0.269	0.081	6.93739e-80	2	VWA1
PDLIM2.1	2.94259e-84	0.373474	0.613	0.36	9.86887e-80	2	PDLIM2
PSEN2	1.85427e-83	0.275852	0.304	0.103	6.21884e-79	2	PSEN2
CRABP2.1	2.88634e-83	-0.70081	0.199	0.508	9.6802e-79	2	CRABP2
ANXA2.2	7.66271e-83	0.293808	0.967	0.734	2.56992e-78	2	ANXA2
SNHG18	8.70993e-83	0.343062	0.544	0.289	2.92114e-78	2	SNHG18
TMEM132A	1.85943e-82	0.393537	0.697	0.45	6.23616e-78	2	TMEM132A
QPRT.2	3.96144e-82	0.310793	0.809	0.522	1.32859e-77	2	QPRT
GFRA1.1	2.14549e-81	0.336275	0.52	0.255	7.19554e-77	2	GFRA1
KCTD16	2.15003e-80	0.36505	0.386	0.154	7.21076e-76	2	KCTD16
SULF2	4.6797e-80	0.332689	0.422	0.185	1.56948e-75	2	SULF2
EEF1B2	3.95737e-79	-0.408645	0.95	0.887	1.32722e-74	2	EEF1B2
LINC00461.2	4.38544e-79	-0.852098	0.044	0.334	1.47079e-74	2	LINC00461
MAML2	7.05564e-79	0.32067	0.388	0.165	2.36632e-74	2	MAML2
NEDD9	2.57229e-78	0.332773	0.414	0.185	8.62696e-74	2	NEDD9
TMEM88	6.23862e-78	0.31576	0.371	0.15	2.09231e-73	2	TMEM88
SVIL	6.75877e-78	0.337262	0.599	0.34	2.26676e-73	2	SVIL
SCUBE3	7.27228e-78	0.360032	0.544	0.29	2.43898e-73	2	SCUBE3
ERBB2	8.59607e-78	0.311973	0.377	0.159	2.88295e-73	2	ERBB2
MSI2.1	1.02332e-77	0.326435	0.927	0.732	3.43201e-73	2	MSI2
CPXM1	1.30705e-77	0.401427	0.588	0.342	4.38359e-73	2	CPXM1
KLF3.1	1.3774e-77	0.33444	0.613	0.373	4.61952e-73	2	KLF3
PFKM	1.72437e-77	0.306429	0.611	0.359	5.78319e-73	2	PFKM
UBE2T.2	2.43294e-77	-0.644702	0.098	0.395	8.15961e-73	2	UBE2T
HES6	3.6088e-77	-1.05317	0.138	0.444	1.21032e-72	2	HES6
SMS	4.13211e-77	-0.560677	0.279	0.577	1.38583e-72	2	SMS
SLC37A1	4.29093e-77	0.263859	0.372	0.151	1.43909e-72	2	SLC37A1
EVA1B.1	6.55579e-77	0.294725	0.482	0.235	2.19868e-72	2	EVA1B
HMGA1	7.97531e-77	-0.52566	0.772	0.823	2.67476e-72	2	HMGA1
COL4A5	9.37349e-77	0.327516	0.418	0.189	3.14368e-72	2	COL4A5
MBOAT2	1.31036e-76	0.353879	0.602	0.356	4.39468e-72	2	MBOAT2
CIRBP.1	2.36824e-76	0.287653	0.975	0.859	7.9426e-72	2	CIRBP
LRP2.1	6.93325e-76	0.373067	0.64	0.374	2.32527e-71	2	LRP2
CFAP298.1	8.79001e-76	0.308175	0.686	0.442	2.94799e-71	2	CFAP298
LRRN1	1.30876e-75	0.355662	0.534	0.292	4.38932e-71	2	LRRN1
MAP3K1	3.62614e-75	0.290161	0.355	0.143	1.21614e-70	2	MAP3K1
CLSTN1.1	5.43187e-75	0.365326	0.693	0.467	1.82174e-70	2	CLSTN1
NR2F2	1.05945e-74	-0.596213	0.142	0.444	3.55318e-70	2	NR2F2
PTPRZ1.2	4.62965e-74	-0.930143	0.184	0.456	1.55269e-69	2	PTPRZ1
DPYSL3.1	6.45708e-74	-0.626599	0.054	0.343	2.16558e-69	2	DPYSL3
EFNB1	8.27732e-74	0.346193	0.518	0.27	2.77605e-69	2	EFNB1
CHL1	9.89418e-74	0.291672	0.361	0.141	3.31831e-69	2	CHL1
NPM1.1	1.32801e-73	-0.318297	0.987	0.935	4.45388e-69	2	NPM1
EHD4	1.544e-73	0.298471	0.336	0.132	5.17827e-69	2	EHD4
AC009041.2	3.90017e-72	0.270136	0.36	0.147	1.30804e-67	2	AC009041.2
ZBTB38	4.81455e-72	0.281076	0.463	0.231	1.6147e-67	2	ZBTB38
COL11A1.1	1.88439e-71	0.381456	0.661	0.408	6.31988e-67	2	COL11A1
SRGAP3	2.72557e-71	0.336482	0.718	0.485	9.14101e-67	2	SRGAP3
RIC3.2	4.84763e-71	0.262943	0.618	0.356	1.6258e-66	2	RIC3
CKAP4	5.97696e-71	0.34032	0.815	0.574	2.00455e-66	2	CKAP4
KTN1.2	1.15081e-70	0.339781	0.901	0.68	3.85958e-66	2	KTN1
LHX2.1	3.90049e-70	0.305531	0.926	0.687	1.30814e-65	2	LHX2
PCLAF.2	5.17029e-70	-0.723445	0.079	0.353	1.73401e-65	2	PCLAF
TMEM14C	7.66296e-70	0.289051	0.895	0.709	2.57e-65	2	TMEM14C
NME3	1.05343e-69	0.301861	0.575	0.338	3.53299e-65	2	NME3
MT-CO2.1	1.13406e-69	0.291947	0.999	0.95	3.80342e-65	2	MT-CO2
MFAP2	2.57131e-69	0.327414	0.689	0.445	8.62367e-65	2	MFAP2
SPRY2	3.03746e-69	0.305689	0.468	0.236	1.0187e-64	2	SPRY2
SV2A	3.77952e-69	0.297041	0.423	0.198	1.26757e-64	2	SV2A
MT-ATP6.1	4.82234e-69	0.316281	1	0.934	1.61732e-64	2	MT-ATP6
CALR	5.64149e-69	0.382814	0.935	0.733	1.89204e-64	2	CALR
LMBRD1	7.42984e-69	0.299502	0.475	0.246	2.49182e-64	2	LMBRD1
REST	8.04284e-69	0.323323	0.664	0.415	2.69741e-64	2	REST
NUSAP1.2	1.38964e-68	-0.939249	0.077	0.344	4.66059e-64	2	NUSAP1
RGMA.2	2.31767e-68	-0.472475	0.04	0.307	7.773e-64	2	RGMA
ID3.1	8.66632e-68	0.339147	0.858	0.567	2.90651e-63	2	ID3
NECTIN2.1	1.56602e-67	0.345281	0.655	0.422	5.25213e-63	2	NECTIN2
RFLNB.2	2.35455e-67	0.263503	0.544	0.3	7.89668e-63	2	RFLNB
SOX5	2.36142e-67	0.305189	0.611	0.358	7.91973e-63	2	SOX5
CTNNB1.1	4.00846e-67	0.287236	0.879	0.683	1.34436e-62	2	CTNNB1
GOLGB1.1	4.85148e-67	0.383987	0.863	0.671	1.62709e-62	2	GOLGB1
DDX17	5.7335e-66	0.277124	0.967	0.84	1.9229e-61	2	DDX17
CTNNA2.1	6.14013e-66	0.279592	0.467	0.234	2.05928e-61	2	CTNNA2
POU3F3.2	6.29232e-66	-0.562074	0.032	0.285	2.11032e-61	2	POU3F3
TXNIP.2	1.16622e-65	-0.710696	0.152	0.432	3.91126e-61	2	TXNIP
SOX3.1	1.76309e-65	-0.559326	0.056	0.317	5.91304e-61	2	SOX3
HIVEP1	1.88763e-65	0.317631	0.434	0.217	6.33073e-61	2	HIVEP1
SSR3	2.06687e-65	0.28174	0.821	0.626	6.93186e-61	2	SSR3
BCAP31	2.23898e-65	0.307449	0.672	0.446	7.50909e-61	2	BCAP31
TGFB2.1	2.79506e-65	0.386118	0.502	0.266	9.37409e-61	2	TGFB2
SOX11.1	4.6951e-65	-0.917071	0.795	0.82	1.57464e-60	2	SOX11
CDC5L	1.08863e-64	0.322521	0.789	0.589	3.65106e-60	2	CDC5L
CENPF.1	1.12594e-64	-1.33821	0.228	0.482	3.77619e-60	2	CENPF
EML1	2.20632e-64	0.295052	0.572	0.342	7.39956e-60	2	EML1
SLC16A1	2.42243e-64	0.349928	0.698	0.481	8.12435e-60	2	SLC16A1
EPHA2	3.76141e-64	0.310737	0.429	0.216	1.2615e-59	2	EPHA2
AMOT	4.33966e-64	0.288831	0.351	0.156	1.45544e-59	2	AMOT
EFHD2.1	6.96807e-64	0.259564	0.498	0.264	2.33695e-59	2	EFHD2
COL4A2	7.80571e-64	0.293465	0.645	0.402	2.61788e-59	2	COL4A2
CD63.1	8.59069e-64	0.265357	0.976	0.824	2.88115e-59	2	CD63
ZFHX4.1	2.77334e-63	0.280972	0.815	0.566	9.30123e-59	2	ZFHX4
H3F3B.1	3.8948e-63	0.264205	0.996	0.96	1.30624e-58	2	H3F3B
TMBIM4	4.18917e-63	0.308721	0.75	0.544	1.40496e-58	2	TMBIM4
BCAM	5.37262e-63	0.281694	0.357	0.16	1.80187e-58	2	BCAM
PROS1	5.78328e-63	0.306309	0.441	0.231	1.93959e-58	2	PROS1
TNIK	1.53711e-62	0.302238	0.463	0.245	5.15517e-58	2	TNIK
NASP	1.59586e-62	-0.595805	0.757	0.799	5.3522e-58	2	NASP
LMO3	2.05218e-62	-0.468046	0.036	0.282	6.88261e-58	2	LMO3
MCM7	3.58683e-62	-0.47087	0.176	0.449	1.20295e-57	2	MCM7
BTG2	7.60231e-62	0.425135	0.706	0.496	2.54966e-57	2	BTG2
IGF1R	1.55918e-61	0.336193	0.684	0.468	5.22919e-57	2	IGF1R
CENPU.1	3.20726e-61	-0.53124	0.093	0.349	1.07565e-56	2	CENPU
NPM3	3.69372e-61	0.275126	0.426	0.22	1.2388e-56	2	NPM3
RRBP1	4.06195e-61	0.306426	0.413	0.209	1.3623e-56	2	RRBP1
TUBA1A.1	4.79599e-61	-0.525195	1	0.98	1.60848e-56	2	TUBA1A
EPB41L2	6.57856e-61	0.297743	0.521	0.297	2.20632e-56	2	EPB41L2
ELFN1	1.93127e-60	0.257327	0.356	0.16	6.4771e-56	2	ELFN1
AFF1	2.02097e-60	0.253146	0.419	0.212	6.77794e-56	2	AFF1
HMGB3	2.99745e-60	-0.543028	0.497	0.683	1.00529e-55	2	HMGB3
SLC5A3.1	4.42683e-60	0.323818	0.583	0.369	1.48467e-55	2	SLC5A3
CPEB4	7.48694e-60	0.324495	0.475	0.258	2.51097e-55	2	CPEB4
MAGI3	7.6828e-60	0.29453	0.496	0.276	2.57666e-55	2	MAGI3
SEC62	8.99781e-60	0.269235	0.876	0.695	3.01769e-55	2	SEC62
DIXDC1	1.5718e-59	0.309024	0.585	0.372	5.2715e-55	2	DIXDC1
SMAD3	1.92175e-59	0.275636	0.387	0.19	6.44515e-55	2	SMAD3
MAGED2	1.95339e-59	0.25482	0.912	0.726	6.55129e-55	2	MAGED2
HDAC7	3.13885e-59	0.265191	0.395	0.195	1.05271e-54	2	HDAC7
CENPH	3.38073e-59	-0.441864	0.113	0.371	1.13383e-54	2	CENPH
TMED9	4.71716e-59	0.291812	0.79	0.599	1.58204e-54	2	TMED9
ISYNA1.2	5.6348e-59	0.279807	0.872	0.703	1.8898e-54	2	ISYNA1
PBX3	6.77452e-59	-0.429488	0.114	0.377	2.27204e-54	2	PBX3
IGDCC3.1	9.40622e-59	0.276479	0.55	0.313	3.15466e-54	2	IGDCC3
HSPA5.1	9.79659e-59	0.337677	0.9	0.699	3.28558e-54	2	HSPA5
ITGA6	1.07489e-58	0.303295	0.456	0.246	3.60498e-54	2	ITGA6
ELAVL3.1	1.54929e-58	-0.547397	0.049	0.291	5.19601e-54	2	ELAVL3
ITGAV	1.71114e-58	0.263603	0.481	0.265	5.73883e-54	2	ITGAV
MAD2L1.1	1.96458e-58	-0.632897	0.146	0.39	6.58881e-54	2	MAD2L1
STMN1.1	2.70519e-58	-0.41592	0.983	0.953	9.07268e-54	2	STMN1
HSP90AA1	3.43245e-58	-0.302297	0.997	0.952	1.15118e-53	2	HSP90AA1
MYADM	1.0214e-57	0.343604	0.66	0.44	3.42557e-53	2	MYADM
PON2	1.23968e-57	0.290449	0.707	0.493	4.15765e-53	2	PON2
TM9SF3	1.57727e-57	0.309617	0.742	0.55	5.28986e-53	2	TM9SF3
RHOT1	2.09375e-57	0.266978	0.455	0.251	7.02203e-53	2	RHOT1
CNTNAP2	4.68535e-57	-0.590726	0.078	0.318	1.57137e-52	2	CNTNAP2
TOP2A.1	1.31274e-56	-1.21309	0.151	0.386	4.40265e-52	2	TOP2A
DCLK1	1.5023e-56	0.268606	0.562	0.336	5.03841e-52	2	DCLK1
PTPRF.1	5.50133e-56	0.317787	0.658	0.448	1.84504e-51	2	PTPRF
SOX1	6.60325e-56	-0.386701	0.036	0.266	2.2146e-51	2	SOX1
PDLIM3.2	1.12886e-55	-0.497975	0.068	0.303	3.78597e-51	2	PDLIM3
SRGAP2C	1.69047e-55	0.293449	0.433	0.235	5.66951e-51	2	SRGAP2C
SCD5	3.20526e-55	0.287329	0.398	0.202	1.07498e-50	2	SCD5
ADI1	4.17004e-55	0.28123	0.498	0.288	1.39855e-50	2	ADI1
ATP6AP2	4.83648e-55	0.281019	0.723	0.521	1.62206e-50	2	ATP6AP2
ADAMTS6	7.06091e-55	0.298846	0.413	0.216	2.36809e-50	2	ADAMTS6
TMCO1	8.19025e-55	0.260224	0.779	0.587	2.74684e-50	2	TMCO1
HLA-C	8.85613e-55	0.308838	0.65	0.442	2.97017e-50	2	HLA-C
MED13L	2.50958e-54	0.296085	0.55	0.349	8.41663e-50	2	MED13L
CANX	2.54527e-54	0.29362	0.947	0.763	8.53632e-50	2	CANX
MFSD10	2.95788e-54	0.292865	0.636	0.434	9.92015e-50	2	MFSD10
MARCKS	3.17529e-54	-0.310096	0.991	0.946	1.06493e-49	2	MARCKS
NPC2.1	1.02763e-53	0.256604	0.872	0.659	3.44648e-49	2	NPC2
ACTN4.1	1.03175e-53	0.262705	0.685	0.474	3.46028e-49	2	ACTN4
HES5.2	2.01744e-53	-1.0105	0.146	0.378	6.7661e-49	2	HES5
CENPK	5.39222e-53	-0.453178	0.088	0.322	1.80844e-48	2	CENPK
THBS1	1.08593e-52	0.359995	0.385	0.196	3.64201e-48	2	THBS1
TMEM97	1.27849e-52	-0.470372	0.309	0.545	4.28782e-48	2	TMEM97
SNRPD1	1.48849e-52	-0.473721	0.608	0.726	4.9921e-48	2	SNRPD1
FRMD4A	2.48277e-52	0.265279	0.485	0.281	8.32671e-48	2	FRMD4A
ZEB1.2	2.5056e-52	-0.502069	0.258	0.495	8.40328e-48	2	ZEB1
MAN2A1	5.43452e-52	0.257272	0.383	0.194	1.82263e-47	2	MAN2A1
RRM1	6.54123e-52	-0.437438	0.18	0.423	2.1938e-47	2	RRM1
ATP1B1.1	1.0492e-51	0.267171	0.738	0.52	3.51882e-47	2	ATP1B1
SHROOM3	1.28528e-51	0.270999	0.61	0.402	4.31057e-47	2	SHROOM3
CALU	1.64234e-51	0.256945	0.85	0.633	5.50809e-47	2	CALU
TSPAN4.1	2.43715e-51	0.255698	0.635	0.429	8.1737e-47	2	TSPAN4
RCN1	3.28504e-51	0.27169	0.834	0.641	1.10174e-46	2	RCN1
PMEPA1	5.16815e-51	0.370705	0.425	0.237	1.73329e-46	2	PMEPA1
CNP	5.51995e-51	0.257839	0.52	0.319	1.85128e-46	2	CNP
MKI67.1	7.30945e-51	-0.925735	0.101	0.32	2.45144e-46	2	MKI67
AIG1	8.35788e-51	0.318005	0.556	0.37	2.80307e-46	2	AIG1
TSPAN3	9.6245e-51	0.275408	0.905	0.734	3.22787e-46	2	TSPAN3
B4GAT1	1.51881e-50	0.274203	0.524	0.327	5.09378e-46	2	B4GAT1
RAD51AP1	2.11884e-50	-0.39128	0.041	0.255	7.10617e-46	2	RAD51AP1
UBE2C.2	2.75088e-50	-0.853951	0.061	0.277	9.22589e-46	2	UBE2C
LRPAP1	4.09113e-50	0.273026	0.656	0.47	1.37208e-45	2	LRPAP1
TPX2.1	5.31434e-50	-0.724269	0.076	0.293	1.78232e-45	2	TPX2
CLSPN	6.35468e-50	-0.478766	0.086	0.312	2.13123e-45	2	CLSPN
BTBD3.1	8.52314e-50	0.283373	0.52	0.32	2.85849e-45	2	BTBD3
PIGM	9.08034e-50	0.306989	0.54	0.345	3.04537e-45	2	PIGM
CAMK2N1.2	1.32651e-49	-0.50683	0.249	0.483	4.44886e-45	2	CAMK2N1
HSPD1	2.8989e-49	-0.400912	0.876	0.833	9.72233e-45	2	HSPD1
OGA	3.40369e-49	0.252692	0.723	0.544	1.14153e-44	2	OGA
CDK1.2	4.55685e-49	-0.570101	0.052	0.262	1.52828e-44	2	CDK1
SDK2.1	5.4586e-49	0.309577	0.531	0.337	1.8307e-44	2	SDK2
ASPM.2	7.18955e-49	-0.713422	0.059	0.272	2.41123e-44	2	ASPM
CNN2.1	1.04641e-48	0.263245	0.731	0.53	3.50944e-44	2	CNN2
SNRPE	1.06123e-48	-0.389074	0.777	0.803	3.55915e-44	2	SNRPE
KPNA2.1	1.87742e-48	-0.700352	0.418	0.601	6.29648e-44	2	KPNA2
GRN	3.64458e-48	0.256498	0.465	0.274	1.22232e-43	2	GRN
CKS1B	4.04522e-48	-0.664262	0.381	0.554	1.35669e-43	2	CKS1B
TMEM205	8.16502e-48	0.261373	0.519	0.329	2.73839e-43	2	TMEM205
HSP90B1.1	9.07584e-48	0.282173	0.961	0.777	3.04386e-43	2	HSP90B1
LAMP1	1.10423e-47	0.264807	0.589	0.402	3.70336e-43	2	LAMP1
CENPW	1.14564e-47	-0.356796	0.064	0.279	3.84226e-43	2	CENPW
SPTAN1	1.20382e-47	0.263611	0.677	0.487	4.03736e-43	2	SPTAN1
OS9	1.26509e-47	0.254024	0.646	0.458	4.24284e-43	2	OS9
PPP1R9A	1.87918e-47	0.276809	0.533	0.343	6.30239e-43	2	PPP1R9A
RANBP1.1	1.94804e-47	-0.50028	0.759	0.783	6.53334e-43	2	RANBP1
ITGB8.1	2.38039e-47	0.25163	0.59	0.387	7.98334e-43	2	ITGB8
HNRNPAB	3.68425e-47	-0.440794	0.637	0.727	1.23562e-42	2	HNRNPAB
ZWINT.2	3.74908e-47	-0.388238	0.063	0.274	1.25737e-42	2	ZWINT
SPARCL1	4.75737e-47	0.277379	0.285	0.118	1.59553e-42	2	SPARCL1
MAFG	8.03884e-47	0.261663	0.432	0.248	2.69606e-42	2	MAFG
GAP43.2	8.51523e-47	-0.752264	0.118	0.343	2.85584e-42	2	GAP43
ORC6	1.47567e-46	-0.448945	0.148	0.371	4.94909e-42	2	ORC6
SLC38A1	1.95488e-46	-0.398704	0.338	0.561	6.55627e-42	2	SLC38A1
PEG10.2	5.03618e-46	-0.739455	0.336	0.543	1.68904e-41	2	PEG10
BIRC5	6.23806e-46	-0.54397	0.095	0.305	2.09212e-41	2	BIRC5
NSG1.1	6.29418e-46	-0.508718	0.068	0.277	2.11094e-41	2	NSG1
HMGB2.2	7.16486e-46	-1.06566	0.531	0.635	2.40295e-41	2	HMGB2
CHEK1	8.88364e-46	-0.37525	0.118	0.341	2.97939e-41	2	CHEK1
ARRDC3	1.05787e-45	0.270044	0.751	0.569	3.5479e-41	2	ARRDC3
FGFBP3.2	1.31696e-45	-0.645104	0.311	0.513	4.41682e-41	2	FGFBP3
ID4.1	1.40998e-45	0.254151	0.964	0.793	4.72878e-41	2	ID4
CITED2.1	2.19947e-45	0.300895	0.567	0.375	7.37657e-41	2	CITED2
NUDT4.2	2.72762e-45	0.273193	0.57	0.38	9.14788e-41	2	NUDT4
SLIT2.1	3.06926e-45	0.268741	0.573	0.367	1.02937e-40	2	SLIT2
SCARB2.1	8.09239e-45	0.259659	0.717	0.523	2.71403e-40	2	SCARB2
SYNE2.2	2.38681e-44	-0.52833	0.596	0.711	8.00489e-40	2	SYNE2
PTPN13	2.62836e-44	0.270589	0.461	0.276	8.815e-40	2	PTPN13
SMC4.1	3.04187e-44	-0.702279	0.269	0.461	1.02018e-39	2	SMC4
SNRPB	5.21017e-44	-0.451839	0.643	0.724	1.74739e-39	2	SNRPB
TIMP1	5.21958e-44	0.266233	0.638	0.452	1.75054e-39	2	TIMP1
AEBP1	9.1239e-44	0.256038	0.342	0.179	3.05997e-39	2	AEBP1
PHGDH.1	1.1945e-43	-0.448602	0.275	0.492	4.00611e-39	2	PHGDH
ADGRL3.1	1.42871e-43	0.285908	0.518	0.339	4.79159e-39	2	ADGRL3
IDH2	2.06827e-43	-0.393341	0.336	0.546	6.93658e-39	2	IDH2
IER5L.1	3.7666e-43	0.255427	0.532	0.343	1.26324e-38	2	IER5L
SLC25A6	7.22784e-43	-0.314195	0.924	0.869	2.42407e-38	2	SLC25A6
GINS2	1.03543e-42	-0.427785	0.147	0.36	3.47263e-38	2	GINS2
NELL2	1.68464e-42	-0.409199	0.326	0.542	5.64993e-38	2	NELL2
TXN	2.69655e-42	-0.408217	0.672	0.755	9.04368e-38	2	TXN
MYH9.1	6.14954e-42	0.254507	0.524	0.332	2.06243e-37	2	MYH9
PSAT1	7.20475e-42	-0.399003	0.204	0.428	2.41633e-37	2	PSAT1
H2AFX.1	7.35141e-42	-0.599188	0.25	0.446	2.46552e-37	2	H2AFX
PPIA	2.07743e-41	-0.252097	0.987	0.921	6.96728e-37	2	PPIA
HCRT	2.2816e-41	0.330272	0.392	0.213	7.65202e-37	2	HCRT
PSD3.1	2.47877e-41	-0.29424	0.101	0.311	8.3133e-37	2	PSD3
SORD	4.04021e-41	0.278088	0.378	0.215	1.355e-36	2	SORD
DCX.1	5.16995e-41	-0.751675	0.124	0.322	1.7339e-36	2	DCX
PCDH9.1	1.32155e-40	-0.534499	0.252	0.457	4.43222e-36	2	PCDH9
SETBP1	1.0161e-39	-0.321337	0.087	0.286	3.4078e-35	2	SETBP1
NUDT1	2.71515e-39	-0.319057	0.148	0.356	9.10609e-35	2	NUDT1
KIF20B.1	6.37779e-39	-0.441201	0.109	0.307	2.13898e-34	2	KIF20B
ATP2B1.1	1.853e-38	0.263684	0.608	0.44	6.21458e-34	2	ATP2B1
HMGN2	2.30074e-38	-0.555916	0.918	0.854	7.71622e-34	2	HMGN2
C1orf21	2.34046e-38	-0.32663	0.196	0.413	7.84943e-34	2	C1orf21
ARL4A	3.77672e-38	-0.456049	0.205	0.409	1.26664e-33	2	ARL4A
MIS18BP1.1	4.28062e-38	-0.512657	0.189	0.386	1.43563e-33	2	MIS18BP1
BASP1.1	4.61852e-38	-0.549095	0.804	0.824	1.54896e-33	2	BASP1
TMPO	5.46946e-38	-0.503758	0.55	0.659	1.83435e-33	2	TMPO
CKS2	6.85826e-38	-0.654265	0.322	0.507	2.30012e-33	2	CKS2
BCL11A	1.25301e-37	-0.375483	0.243	0.452	4.20233e-33	2	BCL11A
ANP32E	1.34554e-37	-0.512673	0.633	0.708	4.51268e-33	2	ANP32E
NOTCH2	1.9381e-37	0.254234	0.376	0.219	6.50001e-33	2	NOTCH2
CBX4	2.38178e-37	0.254348	0.476	0.311	7.98803e-33	2	CBX4
GMNN.1	5.45393e-37	-0.393778	0.195	0.399	1.82914e-32	2	GMNN
SMC2	5.63487e-37	-0.451279	0.238	0.427	1.88982e-32	2	SMC2
PCNA.1	6.10956e-37	-0.502757	0.299	0.483	2.04902e-32	2	PCNA
MCM4	1.20929e-36	-0.40389	0.16	0.354	4.05573e-32	2	MCM4
ATAD5	3.42284e-36	-0.339396	0.132	0.331	1.14795e-31	2	ATAD5
HIST1H1D	3.90047e-36	-0.552965	0.151	0.339	1.30814e-31	2	HIST1H1D
ATF3	1.40938e-35	0.295811	0.38	0.216	4.72678e-31	2	ATF3
ENO1.1	1.49307e-35	-0.478477	0.925	0.896	5.00746e-31	2	ENO1
C12orf75	2.4127e-35	-0.267098	0.087	0.272	8.09172e-31	2	C12orf75
FDFT1.1	2.5159e-35	-0.421994	0.453	0.617	8.43784e-31	2	FDFT1
FTH1	5.80858e-35	-0.263518	0.995	0.966	1.94808e-30	2	FTH1
ZNF738	5.93259e-35	-0.347053	0.288	0.49	1.98967e-30	2	ZNF738
FBLN1	7.27946e-35	-0.298916	0.302	0.532	2.44139e-30	2	FBLN1
UBE2S.1	1.3993e-34	-0.669609	0.465	0.592	4.69297e-30	2	UBE2S
HELLS	1.78919e-34	-0.50926	0.336	0.5	6.0006e-30	2	HELLS
MTHFD2	2.67085e-34	-0.295834	0.078	0.255	8.9575e-30	2	MTHFD2
FEZ1.1	1.50796e-33	-0.412599	0.352	0.523	5.05739e-29	2	FEZ1
YWHAE	3.50981e-33	-0.25397	0.948	0.896	1.17712e-28	2	YWHAE
LMNB1	1.60673e-32	-0.44736	0.363	0.516	5.38865e-28	2	LMNB1
SRSF7	1.73309e-32	-0.345138	0.79	0.801	5.81243e-28	2	SRSF7
DBF4	2.19451e-32	-0.310016	0.131	0.312	7.35995e-28	2	DBF4
USP1	2.55865e-32	-0.389401	0.273	0.456	8.58121e-28	2	USP1
CREB5.2	2.74989e-32	-0.386018	0.15	0.327	9.22258e-28	2	CREB5
PTGES3	3.53291e-32	-0.317912	0.865	0.839	1.18487e-27	2	PTGES3
ADGRG1.1	1.00144e-31	-0.258412	0.095	0.267	3.35864e-27	2	ADGRG1
PEA15	1.51554e-31	-0.271346	0.175	0.369	5.0828e-27	2	PEA15
MAZ	2.33318e-31	-0.349798	0.547	0.682	7.825e-27	2	MAZ
FDPS.1	2.36355e-31	-0.418681	0.6	0.681	7.92686e-27	2	FDPS
LRRC17	2.71674e-31	-0.388044	0.094	0.264	9.11141e-27	2	LRRC17
CCNB1.1	6.83417e-31	-0.691623	0.112	0.275	2.29204e-26	2	CCNB1
PKM	8.92448e-31	-0.335031	0.879	0.852	2.99309e-26	2	PKM
PAICS	1.03638e-30	-0.362266	0.425	0.577	3.47581e-26	2	PAICS
EIF4EBP1	1.06659e-30	-0.356256	0.257	0.443	3.57712e-26	2	EIF4EBP1
MCM3	1.51935e-30	-0.363628	0.197	0.378	5.09559e-26	2	MCM3
BCAT1.1	2.48761e-30	-0.309188	0.194	0.377	8.34293e-26	2	BCAT1
XRCC5	3.29401e-30	-0.311228	0.851	0.827	1.10475e-25	2	XRCC5
WASF1.1	5.72117e-30	-0.330337	0.269	0.457	1.91877e-25	2	WASF1
TYMS.2	8.76185e-30	-0.582842	0.36	0.491	2.93855e-25	2	TYMS
MLLT11.1	1.3026e-29	-0.638326	0.627	0.714	4.36864e-25	2	MLLT11
PPP1R14B	1.90156e-29	-0.326089	0.834	0.823	6.37746e-25	2	PPP1R14B
IGFBP2.2	2.0239e-29	-0.513801	0.983	0.908	6.78775e-25	2	IGFBP2
OAZ1	2.08536e-29	-0.32868	0.774	0.804	6.99388e-25	2	OAZ1
HDAC2	2.30466e-29	-0.342315	0.658	0.737	7.72938e-25	2	HDAC2
RPA3	1.19854e-28	-0.335243	0.272	0.443	4.01966e-24	2	RPA3
RFC4	1.2361e-28	-0.271118	0.154	0.328	4.14562e-24	2	RFC4
VRK1	1.76322e-28	-0.267503	0.132	0.298	5.91349e-24	2	VRK1
ANP32B	1.89928e-28	-0.382611	0.734	0.758	6.36979e-24	2	ANP32B
ATAD2	2.6548e-28	-0.33539	0.116	0.277	8.90368e-24	2	ATAD2
MIAT.2	2.75918e-28	-0.735864	0.294	0.452	9.25374e-24	2	MIAT
NME1	4.91013e-28	-0.370714	0.631	0.69	1.64676e-23	2	NME1
CALM1	5.37352e-28	-0.338463	0.891	0.874	1.80217e-23	2	CALM1
CNIH2	8.59252e-28	-0.293837	0.172	0.344	2.88176e-23	2	CNIH2
CCNB2	2.99074e-27	-0.509028	0.144	0.298	1.00303e-22	2	CCNB2
HMGCS1.1	9.94311e-27	-0.420434	0.467	0.602	3.33472e-22	2	HMGCS1
SCD.1	1.07574e-26	-0.331239	0.284	0.461	3.60782e-22	2	SCD
TUBB2A	2.60742e-26	-0.523062	0.481	0.614	8.74478e-22	2	TUBB2A
LSM4	6.50181e-26	-0.333179	0.62	0.703	2.18058e-21	2	LSM4
SNRPA1	8.27179e-26	-0.305283	0.376	0.551	2.77419e-21	2	SNRPA1
PCBP4	1.27044e-25	-0.418739	0.273	0.435	4.26081e-21	2	PCBP4
BCL7A	2.68233e-25	-0.276237	0.209	0.379	8.99601e-21	2	BCL7A
C3orf14	4.40423e-25	-0.2558	0.184	0.351	1.47709e-20	2	C3orf14
TOX3.1	6.62093e-25	-0.259621	0.15	0.315	2.22053e-20	2	TOX3
ACAT2	1.00592e-24	-0.394908	0.395	0.537	3.37364e-20	2	ACAT2
CCNB1IP1.1	1.01343e-24	-0.330049	0.507	0.631	3.39884e-20	2	CCNB1IP1
PTTG1	1.15883e-24	-0.803159	0.354	0.48	3.88647e-20	2	PTTG1
TLE4.1	1.35901e-24	-0.411433	0.383	0.53	4.55784e-20	2	TLE4
H1FX	1.44802e-24	-0.339386	0.867	0.851	4.85636e-20	2	H1FX
PSMA7	2.2344e-24	-0.255532	0.932	0.879	7.49372e-20	2	PSMA7
STMN2.2	4.26211e-24	-1.50443	0.134	0.268	1.42943e-19	2	STMN2
MYO10	5.58416e-24	-0.318115	0.25	0.409	1.87282e-19	2	MYO10
SHISA2	1.06709e-23	-0.264945	0.151	0.305	3.5788e-19	2	SHISA2
LSM5	1.39074e-23	-0.331052	0.522	0.639	4.66426e-19	2	LSM5
ASRGL1	1.56649e-23	-0.279039	0.234	0.393	5.2537e-19	2	ASRGL1
BUB3	1.90619e-23	-0.393425	0.41	0.539	6.39297e-19	2	BUB3
BZW2	4.51921e-23	-0.281205	0.345	0.505	1.51565e-18	2	BZW2
MEIS2.2	5.60744e-23	-0.466848	0.443	0.565	1.88062e-18	2	MEIS2
FEN1	5.96589e-23	-0.256491	0.132	0.277	2.00084e-18	2	FEN1
EZH2	9.87656e-23	-0.3264	0.341	0.49	3.3124e-18	2	EZH2
PDCD5	1.26691e-22	-0.301747	0.613	0.7	4.24896e-18	2	PDCD5
BEX1	2.07533e-22	-0.375901	0.513	0.638	6.96024e-18	2	BEX1
HNRNPH3	3.65595e-22	-0.300374	0.77	0.79	1.22613e-17	2	HNRNPH3
PFN2	4.31742e-22	-0.312668	0.601	0.693	1.44797e-17	2	PFN2
KLHL23	5.09541e-22	-0.287916	0.36	0.52	1.7089e-17	2	KLHL23
ASCL1.2	6.04102e-22	-0.566914	0.129	0.26	2.02604e-17	2	ASCL1
BTG3	6.05113e-22	-0.289379	0.285	0.432	2.02943e-17	2	BTG3
HNRNPD	6.91453e-22	-0.29315	0.886	0.83	2.31899e-17	2	HNRNPD
NUCKS1.1	8.94386e-22	-0.338917	0.964	0.902	2.99959e-17	2	NUCKS1
EXOSC8	9.02175e-22	-0.295582	0.343	0.493	3.02572e-17	2	EXOSC8
SHTN1	1.16751e-21	-0.362049	0.274	0.415	3.91561e-17	2	SHTN1
FBXO5	1.26197e-21	-0.262232	0.141	0.281	4.23239e-17	2	FBXO5
HILPDA	1.2986e-21	-0.311752	0.247	0.403	4.35525e-17	2	HILPDA
SNRPF	1.36277e-21	-0.313956	0.689	0.724	4.57046e-17	2	SNRPF
STMN4.1	1.41081e-21	-0.408836	0.176	0.316	4.73157e-17	2	STMN4
DTYMK	1.79411e-21	-0.331855	0.334	0.47	6.01709e-17	2	DTYMK
SRM	2.18883e-21	-0.268747	0.354	0.499	7.3409e-17	2	SRM
ILF2	2.65901e-21	-0.316062	0.67	0.714	8.91779e-17	2	ILF2
DNAJC9	2.74287e-21	-0.280294	0.234	0.387	9.19903e-17	2	DNAJC9
UBE2I	4.48695e-21	-0.270117	0.715	0.756	1.50483e-16	2	UBE2I
CDKN2D.1	7.05181e-21	-0.293759	0.133	0.266	2.36504e-16	2	CDKN2D
MSMO1.1	7.22825e-21	-0.29511	0.335	0.486	2.42421e-16	2	MSMO1
TPGS2	1.27515e-20	-0.292082	0.476	0.596	4.27661e-16	2	TPGS2
SEPT6	1.63637e-20	-0.269596	0.218	0.37	5.48806e-16	2	SEPT6
RHOBTB3	2.3862e-20	-0.313995	0.356	0.496	8.00284e-16	2	RHOBTB3
YWHAH	2.41364e-20	-0.338127	0.554	0.644	8.09486e-16	2	YWHAH
MAP6.1	2.47893e-20	-0.338426	0.266	0.409	8.31384e-16	2	MAP6
GPI.1	3.01503e-20	-0.533552	0.433	0.562	1.01118e-15	2	GPI
CYCS	3.99107e-20	-0.303671	0.575	0.654	1.33852e-15	2	CYCS
SMC3	1.33095e-19	-0.293675	0.766	0.767	4.46373e-15	2	SMC3
BTF3L4	1.37135e-19	-0.302329	0.62	0.694	4.59922e-15	2	BTF3L4
TIMP3	1.54802e-19	0.266103	0.325	0.217	5.19176e-15	2	TIMP3
CDO1.1	1.9986e-19	-0.319534	0.293	0.427	6.70289e-15	2	CDO1
RAB8B.1	3.05688e-19	-0.259796	0.238	0.382	1.02522e-14	2	RAB8B
CACYBP	4.19497e-19	-0.288145	0.459	0.579	1.40691e-14	2	CACYBP
MBIP	5.36569e-19	-0.360636	0.33	0.462	1.79955e-14	2	MBIP
NAE1	6.15279e-19	-0.268876	0.465	0.598	2.06352e-14	2	NAE1
PGAM1	6.72275e-19	-0.319578	0.643	0.704	2.25468e-14	2	PGAM1
PFDN2	7.34658e-19	-0.284391	0.558	0.671	2.4639e-14	2	PFDN2
TKT	9.77285e-19	-0.32067	0.707	0.73	3.27762e-14	2	TKT
NUDT3	1.17317e-18	-0.263266	0.312	0.457	3.93459e-14	2	NUDT3
TCP1	1.28514e-18	-0.290478	0.552	0.644	4.31012e-14	2	TCP1
H2AFV	3.31339e-18	-0.323782	0.719	0.724	1.11124e-13	2	H2AFV
UCHL1	5.87074e-18	-0.366992	0.766	0.788	1.96893e-13	2	UCHL1
SYT1.2	1.49053e-17	-0.484358	0.36	0.481	4.99893e-13	2	SYT1
FBL.1	1.61287e-17	-0.276872	0.499	0.605	5.40924e-13	2	FBL
IDI1	1.66021e-17	-0.325172	0.476	0.586	5.56803e-13	2	IDI1
PDLIM1	3.87637e-17	-0.272542	0.159	0.281	1.30006e-12	2	PDLIM1
HSPE1	3.97424e-17	-0.285207	0.841	0.788	1.33288e-12	2	HSPE1
SCRG1.1	4.06281e-17	-0.253978	0.147	0.266	1.36258e-12	2	SCRG1
TOMM20.1	4.66759e-17	-0.277342	0.834	0.805	1.56541e-12	2	TOMM20
HIST1H4C.1	7.97676e-17	-0.976658	0.504	0.559	2.67525e-12	2	HIST1H4C
DTD1	3.4376e-16	-0.263978	0.41	0.544	1.1529e-11	2	DTD1
PA2G4	5.21427e-16	-0.285553	0.594	0.664	1.74876e-11	2	PA2G4
RTN1.2	6.55136e-16	-0.479534	0.192	0.311	2.1972e-11	2	RTN1
NREP	1.69652e-15	-0.367053	0.654	0.71	5.68978e-11	2	NREP
CKAP2.1	2.10708e-15	-0.360283	0.263	0.375	7.06672e-11	2	CKAP2
DHFR	2.24157e-15	-0.295041	0.271	0.387	7.51778e-11	2	DHFR
ENO2.1	2.31621e-15	-0.427491	0.267	0.391	7.7681e-11	2	ENO2
RHEB	3.2003e-15	-0.280649	0.602	0.657	1.07332e-10	2	RHEB
DYNLT1	5.22871e-15	-0.269887	0.726	0.763	1.7536e-10	2	DYNLT1
MZT1	5.56942e-15	-0.274051	0.282	0.407	1.86787e-10	2	MZT1
LSM3	1.22329e-14	-0.260102	0.53	0.613	4.10265e-10	2	LSM3
EIF4A1	3.24135e-14	-0.260059	0.643	0.697	1.08708e-09	2	EIF4A1
MAP1B.1	3.73665e-14	-0.370548	0.981	0.904	1.2532e-09	2	MAP1B
CCDC34	5.10394e-14	-0.304999	0.353	0.463	1.71176e-09	2	CCDC34
SRGAP1.1	5.75141e-14	-0.298748	0.328	0.437	1.92891e-09	2	SRGAP1
NNAT.1	6.98479e-14	-0.63334	0.66	0.718	2.34256e-09	2	NNAT
SRSF2	7.03263e-14	-0.280901	0.754	0.744	2.3586e-09	2	SRSF2
PPP1CC	7.3357e-14	-0.25631	0.563	0.655	2.46025e-09	2	PPP1CC
CKAP5	7.72805e-14	-0.270344	0.308	0.42	2.59183e-09	2	CKAP5
YBX3	1.06307e-13	-0.263973	0.432	0.53	3.56533e-09	2	YBX3
DUT.1	3.03117e-13	-0.418929	0.622	0.647	1.01659e-08	2	DUT
RPS27L.1	4.35893e-13	-0.338029	0.671	0.703	1.4619e-08	2	RPS27L
FTL	5.51476e-13	-0.250604	0.995	0.943	1.84954e-08	2	FTL
CCT5	5.98185e-13	-0.269324	0.72	0.723	2.00619e-08	2	CCT5
EIF2S2.1	4.03316e-12	-0.269019	0.556	0.64	1.35264e-07	2	EIF2S2
BTG1.2	1.09545e-11	-0.309866	0.755	0.786	3.6739e-07	2	BTG1
CALM3	7.27636e-11	-0.255638	0.64	0.69	2.44035e-06	2	CALM3
RPAIN	9.43727e-11	-0.270532	0.599	0.661	3.16507e-06	2	RPAIN
CARHSP1	9.99379e-11	-0.250239	0.529	0.613	3.35172e-06	2	CARHSP1
TUBA1C	1.77404e-10	-0.326948	0.243	0.332	5.94978e-06	2	TUBA1C
HIPK2	1.92789e-10	-0.25627	0.543	0.607	6.46576e-06	2	HIPK2
GJA1.1	7.12291e-10	-0.255835	0.199	0.289	2.38888e-05	2	GJA1
DEK	2.80597e-09	-0.27316	0.892	0.804	9.41067e-05	2	DEK
ALDH1A1.2	5.24413e-09	-0.849968	0.326	0.395	0.000175878	2	ALDH1A1
NDN	1.07482e-08	-0.280344	0.643	0.678	0.000360472	2	NDN
TAGLN.2	3.27391e-08	-0.369513	0.472	0.367	0.001098	2	TAGLN
PGK1	7.96423e-08	-0.356094	0.786	0.791	0.00267104	2	PGK1
ZFHX3.1	1.79321e-07	-0.310218	0.35	0.434	0.00601406	2	ZFHX3
QKI.1	1.73295e-06	-0.274198	0.793	0.746	0.0581197	2	QKI
RND3.1	7.21194e-06	-0.329071	0.517	0.57	0.241874	2	RND3
NES.2	2.25892e-05	-0.37537	0.651	0.614	0.757596	2	NES
FAM162A	0.00295031	-0.283218	0.515	0.552	1	2	FAM162A
IGFBP5	0.00308497	-0.485331	0.371	0.397	1	2	IGFBP5
TERF2IP.1	0.0044184	-0.258046	0.594	0.616	1	2	TERF2IP
STMN2.3	0	2.54243	0.991	0.182	0	3	STMN2
DLX6-AS1	0	1.78141	0.731	0.062	0	3	DLX6-AS1
NEFL	0	1.58012	0.663	0.066	0	3	NEFL
DCX.2	0	1.53667	0.911	0.243	0	3	DCX
RTN1.3	0	1.5134	0.817	0.248	0	3	RTN1
ENO2.2	0	1.44605	0.887	0.328	0	3	ENO2
NEFM	0	1.37135	0.644	0.076	0	3	NEFM
KIF5C.1	0	1.34565	0.908	0.526	0	3	KIF5C
TUBB2B.2	0	1.29635	1	0.9	0	3	TUBB2B
INA	0	1.27431	0.736	0.09	0	3	INA
TUBB2A.1	0	1.25755	0.923	0.569	0	3	TUBB2A
GDAP1L1	0	1.20097	0.766	0.098	0	3	GDAP1L1
SOX4.2	0	1.16698	0.994	0.867	0	3	SOX4
MLLT11.2	0	1.16075	0.962	0.68	0	3	MLLT11
SOX11.2	0	1.1467	0.982	0.801	0	3	SOX11
BASP1.2	0	1.13165	0.984	0.806	0	3	BASP1
MAPT	0	1.11462	0.628	0.078	0	3	MAPT
POU2F2	0	1.07859	0.546	0.074	0	3	POU2F2
DLX5	0	1.0665	0.676	0.121	0	3	DLX5
SCG3	0	1.04647	0.754	0.162	0	3	SCG3
TERF2IP.2	0	1.02928	0.918	0.584	0	3	TERF2IP
ELAVL4	0	1.01689	0.77	0.141	0	3	ELAVL4
GRIA2	0	1.00033	0.528	0.029	0	3	GRIA2
ARX	0	0.99921	0.503	0.037	0	3	ARX
RUNX1T1	0	0.995603	0.521	0.06	0	3	RUNX1T1
NSG1.2	0	0.987073	0.722	0.211	0	3	NSG1
RAB3A	0	0.985881	0.614	0.061	0	3	RAB3A
CELF4	0	0.969899	0.504	0.089	0	3	CELF4
ELAVL3.2	0	0.968786	0.754	0.22	0	3	ELAVL3
MIR7-3HG	0	0.944637	0.542	0.039	0	3	MIR7-3HG
NSG2	0	0.902377	0.508	0.027	0	3	NSG2
FAM57B	0	0.834758	0.584	0.131	0	3	FAM57B
LHX8	0	0.83225	0.346	0.015	0	3	LHX8
DLX2	0	0.821016	0.579	0.1	0	3	DLX2
DLX6	0	0.807034	0.435	0.032	0	3	DLX6
ATCAY	0	0.791043	0.562	0.11	0	3	ATCAY
DCC	0	0.784129	0.528	0.08	0	3	DCC
TTC9B	0	0.780179	0.475	0.022	0	3	TTC9B
C11orf96	0	0.775341	0.376	0.039	0	3	C11orf96
NRXN3	0	0.764934	0.451	0.054	0	3	NRXN3
ECEL1	0	0.737981	0.467	0.05	0	3	ECEL1
CELF3	0	0.717521	0.53	0.086	0	3	CELF3
SEZ6L2	0	0.715642	0.433	0.051	0	3	SEZ6L2
DLX1	0	0.713413	0.548	0.1	0	3	DLX1
POU3F4	0	0.700774	0.322	0.025	0	3	POU3F4
FGF14	0	0.668803	0.316	0.019	0	3	FGF14
GAD1	0	0.617521	0.324	0.021	0	3	GAD1
MYT1L	0	0.612668	0.4	0.015	0	3	MYT1L
SLC32A1	0	0.493001	0.295	0.017	0	3	SLC32A1
MDK.2	0	-1.52379	0.687	0.934	0	3	MDK
L1CAM	1.29228e-298	0.645993	0.426	0.065	4.33404e-294	3	L1CAM
GSTP1.2	1.73475e-298	-1.11008	0.818	0.941	5.818e-294	3	GSTP1
SYT1.3	2.02161e-293	1.20237	0.856	0.43	6.78007e-289	3	SYT1
VIM	4.68192e-293	-1.11691	0.959	0.987	1.57022e-288	3	VIM
TUBA1A.2	1.49149e-292	0.948706	1	0.98	5.00216e-288	3	TUBA1A
SPARC.2	7.08244e-292	-1.54153	0.202	0.812	2.37531e-287	3	SPARC
RPS6	2.6677e-288	-0.749274	0.972	0.973	8.94694e-284	3	RPS6
TAGLN3.2	1.89386e-287	0.855993	0.737	0.242	6.35164e-283	3	TAGLN3
SNAP25	1.23223e-285	0.628026	0.408	0.062	4.13265e-281	3	SNAP25
CRMP1.2	2.52501e-283	0.998363	0.875	0.483	8.46838e-279	3	CRMP1
RPLP1	1.64144e-280	-0.649275	0.991	0.983	5.50507e-276	3	RPLP1
ZFP36L1.2	7.81894e-277	-1.48459	0.124	0.761	2.62232e-272	3	ZFP36L1
GNG3	3.21005e-276	0.879503	0.621	0.181	1.07659e-271	3	GNG3
CD24.2	2.50544e-275	0.900173	0.968	0.758	8.40275e-271	3	CD24
ISL1	1.05853e-274	0.716882	0.375	0.049	3.55011e-270	3	ISL1
CHGB	2.54387e-274	0.570488	0.342	0.041	8.53165e-270	3	CHGB
NREP.1	1.50723e-271	0.949505	0.926	0.683	5.05496e-267	3	NREP
CCNI	3.67819e-269	0.785198	0.983	0.879	1.23359e-264	3	CCNI
CCND1.1	4.07963e-265	-1.49355	0.259	0.81	1.36823e-260	3	CCND1
ANXA2.3	9.00087e-265	-1.49625	0.243	0.807	3.01871e-260	3	ANXA2
NMNAT2	9.64642e-265	0.411188	0.26	0.021	3.23522e-260	3	NMNAT2
MIAT.3	3.53904e-263	1.02679	0.835	0.398	1.18692e-258	3	MIAT
SMIM18	9.36327e-263	0.418999	0.251	0.019	3.14025e-258	3	SMIM18
RAPGEF5	3.30349e-261	0.414199	0.255	0.02	1.10793e-256	3	RAPGEF5
KIF21B	3.28357e-260	0.595134	0.403	0.068	1.10124e-255	3	KIF21B
TMSB10.2	3.51797e-257	0.818722	0.995	0.939	1.17986e-252	3	TMSB10
DPYSL3.2	3.92517e-254	0.88167	0.721	0.275	1.31642e-249	3	DPYSL3
GABRB3	1.76459e-253	0.621616	0.436	0.083	5.91809e-249	3	GABRB3
MT-CO3.1	4.01448e-251	-1.06017	0.959	0.968	1.34638e-246	3	MT-CO3
GAP43.3	5.55229e-251	1.22924	0.708	0.283	1.86213e-246	3	GAP43
SRRM4	2.47916e-250	0.603286	0.485	0.099	8.3146e-246	3	SRRM4
CELF5	4.22627e-250	0.739956	0.559	0.153	1.41741e-245	3	CELF5
MAP2.2	8.66186e-246	0.92421	0.897	0.606	2.90501e-241	3	MAP2
NRP1	1.053e-244	0.719783	0.43	0.085	3.53154e-240	3	NRP1
STMN4.2	2.81106e-241	1.13789	0.693	0.264	9.42773e-237	3	STMN4
GNG5	4.7567e-240	-1.02011	0.371	0.849	1.5953e-235	3	GNG5
SOX2.1	7.72469e-240	-1.25374	0.203	0.777	2.59071e-235	3	SOX2
KIF5A.1	4.31221e-239	0.772843	0.617	0.2	1.44623e-234	3	KIF5A
LHX2.2	4.54301e-233	-1.1078	0.192	0.761	1.52363e-228	3	LHX2
MALAT1.1	6.24207e-232	0.78273	1	0.999	2.09347e-227	3	MALAT1
EEF1A2	6.5484e-232	0.728612	0.53	0.148	2.1962e-227	3	EEF1A2
BNIP3.1	1.78312e-226	1.18155	0.868	0.536	5.98024e-222	3	BNIP3
CSRNP3	1.92171e-226	0.793862	0.611	0.212	6.44504e-222	3	CSRNP3
CYR61.2	3.61484e-224	-1.55721	0.127	0.696	1.21235e-219	3	CYR61
MYT1	1.40916e-223	0.512029	0.365	0.061	4.72603e-219	3	MYT1
TTC3.1	5.84746e-221	0.662568	0.985	0.876	1.96112e-216	3	TTC3
MAP1B.2	1.38194e-219	0.815948	0.994	0.903	4.63474e-215	3	MAP1B
MT-CO2.2	6.03065e-217	-0.955963	0.956	0.954	2.02256e-212	3	MT-CO2
PEG10.3	1.13438e-213	1.20317	0.816	0.494	3.80447e-209	3	PEG10
MT-CYB.3	1.36869e-212	-0.986303	0.925	0.949	4.59032e-208	3	MT-CYB
CEP170.1	1.19792e-210	0.844648	0.826	0.538	4.01758e-206	3	CEP170
NRXN1	6.73074e-210	0.780111	0.537	0.163	2.25736e-205	3	NRXN1
APLP1.2	1.07338e-209	0.88383	0.771	0.452	3.59992e-205	3	APLP1
GAD2	1.69565e-209	0.764642	0.51	0.136	5.68686e-205	3	GAD2
INSM1	2.96931e-209	0.732297	0.493	0.122	9.95846e-205	3	INSM1
PGK1.1	4.05966e-209	1.17107	0.924	0.777	1.36153e-204	3	PGK1
ATP1A3	7.51301e-208	0.439966	0.298	0.043	2.51971e-203	3	ATP1A3
JPT1.1	5.70336e-207	0.709196	0.962	0.797	1.91279e-202	3	JPT1
LINGO1	7.54105e-207	0.47582	0.309	0.046	2.52912e-202	3	LINGO1
SCN3B	1.48284e-206	0.486524	0.315	0.049	4.97315e-202	3	SCN3B
HMGN2.1	4.14677e-205	-1.15956	0.65	0.881	1.39074e-200	3	HMGN2
SH3BP5	3.00069e-203	0.64938	0.438	0.107	1.00637e-198	3	SH3BP5
LINC00599	3.79208e-202	0.473153	0.313	0.047	1.27179e-197	3	LINC00599
GPI.2	3.48603e-200	1.40359	0.798	0.525	1.16914e-195	3	GPI
CAMK2N2	4.81413e-200	0.417603	0.257	0.032	1.61456e-195	3	CAMK2N2
PGM2L1	7.48494e-200	0.813082	0.539	0.178	2.5103e-195	3	PGM2L1
RPL23A	2.30409e-198	-0.548338	0.963	0.949	7.72746e-194	3	RPL23A
COL2A1.3	3.71226e-196	-1.29976	0.074	0.622	1.24502e-191	3	COL2A1
EIF1	3.80184e-196	0.566963	0.988	0.927	1.27506e-191	3	EIF1
MT-ATP6.2	4.9454e-196	-0.902059	0.89	0.945	1.65859e-191	3	MT-ATP6
POU3F2.1	4.80689e-195	0.771944	0.495	0.14	1.61214e-190	3	POU3F2
RAB3C	1.26857e-193	0.460161	0.293	0.045	4.25452e-189	3	RAB3C
IFITM2.3	3.28056e-192	-1.35264	0.136	0.669	1.10024e-187	3	IFITM2
CALD1.2	2.27758e-191	-1.16047	0.302	0.768	7.63855e-187	3	CALD1
CD99.1	2.30748e-190	-0.879333	0.226	0.745	7.73883e-186	3	CD99
IFITM3.2	6.61062e-190	-1.28928	0.099	0.634	2.21707e-185	3	IFITM3
MT-CO1.1	7.70816e-189	-0.798743	0.971	0.969	2.58516e-184	3	MT-CO1
SYT5	5.46344e-187	0.394213	0.267	0.038	1.83233e-182	3	SYT5
NKX2-1	8.88603e-187	0.767881	0.506	0.145	2.9802e-182	3	NKX2-1
MAP6.2	4.73683e-186	0.825126	0.704	0.365	1.58864e-181	3	MAP6
BCL11B	1.78382e-183	0.507734	0.265	0.038	5.98256e-179	3	BCL11B
HES1.2	3.22914e-183	-1.31252	0.16	0.667	1.08299e-178	3	HES1
RPS2.1	2.1937e-182	-0.475591	0.995	0.978	7.35722e-178	3	RPS2
OLFM1	1.51211e-179	0.553718	0.439	0.117	5.07132e-175	3	OLFM1
CNN3.2	6.61601e-178	-0.888982	0.505	0.832	2.21888e-173	3	CNN3
PRDX6.3	2.41801e-177	-0.928224	0.435	0.809	8.10951e-173	3	PRDX6
SCG2	3.66546e-176	0.512088	0.259	0.037	1.22932e-171	3	SCG2
CNIH2.1	4.7856e-175	0.747604	0.634	0.298	1.60499e-170	3	CNIH2
NPC2.2	7.68416e-174	-0.923182	0.246	0.722	2.57712e-169	3	NPC2
NCAM1.2	1.00759e-173	0.776604	0.813	0.556	3.37926e-169	3	NCAM1
RPL41	2.21418e-173	-0.436113	0.99	0.973	7.42591e-169	3	RPL41
B2M.2	2.52225e-173	-0.927072	0.122	0.643	8.45913e-169	3	B2M
EEF1B2.1	7.29251e-173	-0.686625	0.821	0.9	2.44576e-168	3	EEF1B2
RPL12.1	5.38461e-172	-0.523193	0.965	0.952	1.80589e-167	3	RPL12
GNG2	1.69447e-171	0.515417	0.368	0.085	5.6829e-167	3	GNG2
TMEM59L	2.28526e-171	0.529499	0.351	0.078	7.66429e-167	3	TMEM59L
HNRNPA2B1	1.46842e-170	-0.643725	0.898	0.942	4.92479e-166	3	HNRNPA2B1
ANK3.2	7.67939e-170	0.88084	0.655	0.331	2.57551e-165	3	ANK3
ZFHX3.2	7.87306e-168	1.16556	0.69	0.399	2.64047e-163	3	ZFHX3
NCAN	1.47776e-167	0.390267	0.279	0.047	4.9561e-163	3	NCAN
ANKRD12.1	4.53032e-166	0.776074	0.829	0.605	1.51938e-161	3	ANKRD12
ID3.2	1.46213e-165	-1.56349	0.172	0.636	4.9037e-161	3	ID3
RPS12.1	1.72445e-164	-0.461895	0.991	0.97	5.78348e-160	3	RPS12
MT-ND3.2	9.26373e-164	-0.801623	0.777	0.897	3.10687e-159	3	MT-ND3
VEGFA	4.83722e-163	1.0416	0.623	0.298	1.62231e-158	3	VEGFA
CAMK2N1.3	1.09763e-161	0.786844	0.748	0.432	3.68123e-157	3	CAMK2N1
DAAM1.2	4.99449e-161	0.772158	0.859	0.646	1.67505e-156	3	DAAM1
YBX3.1	1.40049e-160	-0.725871	0.061	0.567	4.69697e-156	3	YBX3
CDKN2D.2	4.8397e-160	0.66757	0.562	0.223	1.62314e-155	3	CDKN2D
SEPT6.1	8.31233e-160	0.738214	0.644	0.326	2.78779e-155	3	SEPT6
GNAO1	4.08762e-159	0.569705	0.383	0.099	1.37091e-154	3	GNAO1
RPLP0.1	1.30558e-158	-0.463404	0.981	0.967	4.37866e-154	3	RPLP0
TXNIP.3	4.72517e-158	0.922941	0.731	0.373	1.58473e-153	3	TXNIP
TPM1.2	5.17166e-157	-1.28942	0.571	0.842	1.73447e-152	3	TPM1
RCN1.1	1.35071e-156	-0.733419	0.224	0.703	4.53002e-152	3	RCN1
KLC1	1.98143e-156	0.669202	0.685	0.382	6.64533e-152	3	KLC1
SFRP2.2	6.92224e-155	-2.4303	0.48	0.808	2.32158e-150	3	SFRP2
BTG1.3	1.05696e-154	0.785079	0.928	0.768	3.54482e-150	3	BTG1
TMEM98	1.91036e-153	-0.751856	0.227	0.699	6.40697e-149	3	TMEM98
LIX1.1	6.23175e-153	-0.928408	0.068	0.55	2.09e-148	3	LIX1
KIDINS220.2	4.46307e-152	0.756092	0.801	0.589	1.49682e-147	3	KIDINS220
SYP	8.22558e-152	0.421789	0.317	0.068	2.7587e-147	3	SYP
SERF2	1.29255e-150	-0.672479	0.736	0.88	4.33494e-146	3	SERF2
SIX6.3	2.45466e-150	-1.33895	0.135	0.583	8.23244e-146	3	SIX6
METRN.1	1.00276e-149	-0.974828	0.547	0.827	3.36307e-145	3	METRN
BTBD8	4.88912e-149	0.512414	0.352	0.089	1.63971e-144	3	BTBD8
RPL19	4.02649e-148	-0.400921	0.989	0.969	1.3504e-143	3	RPL19
NSD3.1	6.15814e-147	0.614819	0.87	0.717	2.06532e-142	3	NSD3
PCSK1N.1	1.19283e-146	0.698884	0.89	0.66	4.00051e-142	3	PCSK1N
MT-ND1.1	4.09693e-146	-0.68527	0.859	0.909	1.37403e-141	3	MT-ND1
WSB1.1	4.81328e-146	0.815651	0.907	0.837	1.61428e-141	3	WSB1
SOBP	1.17729e-145	0.56729	0.444	0.149	3.9484e-141	3	SOBP
SFRP1.3	3.42184e-145	-1.12866	0.273	0.683	1.14762e-140	3	SFRP1
SCN3A	6.6559e-145	0.410206	0.285	0.057	2.23225e-140	3	SCN3A
DNAJC1.2	4.67614e-144	-0.817489	0.235	0.685	1.56828e-139	3	DNAJC1
SLC16A3	1.29588e-143	0.670868	0.429	0.137	4.34612e-139	3	SLC16A3
DPYSL2	4.25287e-143	0.622082	0.844	0.675	1.42633e-138	3	DPYSL2
ANXA5.1	5.13246e-143	-0.737031	0.122	0.597	1.72133e-138	3	ANXA5
HMGN3.1	6.67055e-143	-0.719666	0.574	0.854	2.23717e-138	3	HMGN3
DUSP8	1.61733e-142	0.603364	0.406	0.125	5.4242e-138	3	DUSP8
BNIP3L	6.24549e-141	0.661369	0.905	0.773	2.09461e-136	3	BNIP3L
PTMS	8.59772e-141	0.467404	0.989	0.925	2.8835e-136	3	PTMS
ID1.3	1.07653e-140	-1.13136	0.098	0.544	3.61046e-136	3	ID1
TSHZ2	8.50639e-140	0.514255	0.314	0.073	2.85287e-135	3	TSHZ2
NOVA1.1	2.13162e-139	0.681297	0.692	0.408	7.14903e-135	3	NOVA1
MIR124-2HG.1	3.07249e-139	0.58939	0.548	0.232	1.03045e-134	3	MIR124-2HG
SEPT3	4.93789e-139	0.585492	0.491	0.193	1.65607e-134	3	SEPT3
CACNB4	1.5755e-136	0.356225	0.261	0.051	5.28392e-132	3	CACNB4
RUFY3	2.93871e-136	0.613304	0.756	0.51	9.85585e-132	3	RUFY3
RPS9	5.31751e-136	-0.417615	0.972	0.956	1.78339e-131	3	RPS9
NEGR1	1.61711e-135	0.443321	0.26	0.051	5.42347e-131	3	NEGR1
EIF1B	2.59203e-135	0.574047	0.903	0.768	8.69316e-131	3	EIF1B
CCDC184	3.62812e-135	0.423543	0.294	0.066	1.2168e-130	3	CCDC184
LBH	9.80506e-135	0.606427	0.492	0.196	3.28842e-130	3	LBH
PAK3	2.96301e-134	0.633535	0.491	0.19	9.93735e-130	3	PAK3
SVBP	9.45858e-134	0.611485	0.785	0.571	3.17222e-129	3	SVBP
ELAVL2	3.16483e-133	0.557434	0.456	0.156	1.06142e-128	3	ELAVL2
SNCG	3.214e-133	0.490255	0.391	0.11	1.07791e-128	3	SNCG
HMGA2	4.49693e-133	-0.716207	0.097	0.552	1.50818e-128	3	HMGA2
AKAP6	1.1467e-132	0.483534	0.375	0.108	3.84579e-128	3	AKAP6
EEF1D.1	1.5783e-132	-0.638089	0.639	0.853	5.29331e-128	3	EEF1D
PAX6.1	3.63856e-132	-1.19357	0.119	0.549	1.2203e-127	3	PAX6
GPC2.1	2.14329e-131	0.635744	0.603	0.31	7.18817e-127	3	GPC2
FZD5.1	1.34173e-130	-0.8586	0.18	0.614	4.4999e-126	3	FZD5
MPPED2.1	1.60363e-130	0.614631	0.515	0.215	5.37824e-126	3	MPPED2
FNBP1L	5.29966e-130	0.648905	0.796	0.606	1.7774e-125	3	FNBP1L
EZR	1.78116e-129	-0.648462	0.083	0.525	5.97367e-125	3	EZR
DAPL1.3	9.10544e-129	-1.72022	0.224	0.6	3.05378e-124	3	DAPL1
KIF3C	1.00671e-128	0.458116	0.367	0.111	3.3763e-124	3	KIF3C
FOS.3	1.38988e-128	-1.14489	0.395	0.734	4.66137e-124	3	FOS
RPS15.1	6.39141e-128	-0.376675	0.986	0.959	2.14355e-123	3	RPS15
CALR.1	1.17602e-127	-0.804188	0.465	0.781	3.94414e-123	3	CALR
CLASP2	3.26511e-127	0.595594	0.56	0.269	1.09505e-122	3	CLASP2
REST.1	2.12256e-126	-0.609734	0.046	0.478	7.11864e-122	3	REST
PFKP	3.77778e-126	0.669846	0.41	0.141	1.26699e-121	3	PFKP
PRKACB	8.19991e-126	0.699839	0.448	0.176	2.75009e-121	3	PRKACB
MAF.3	1.14772e-125	-0.833462	0.077	0.504	3.84924e-121	3	MAF
NPM1.2	3.51076e-125	-0.441558	0.961	0.938	1.17744e-120	3	NPM1
PPIA.1	9.49776e-125	-0.483437	0.934	0.927	3.18536e-120	3	PPIA
STXBP1	3.91331e-124	0.478822	0.386	0.124	1.31245e-119	3	STXBP1
ZFP36L2	4.09386e-124	-0.748988	0.05	0.476	1.373e-119	3	ZFP36L2
ID2.3	4.91063e-124	-0.980917	0.136	0.561	1.64693e-119	3	ID2
KIF3A	1.434e-122	0.610404	0.714	0.482	4.80935e-118	3	KIF3A
MAGEL2	4.25858e-122	0.499814	0.299	0.076	1.42824e-117	3	MAGEL2
EGR1.2	1.92399e-121	-0.897907	0.336	0.707	6.45267e-117	3	EGR1
TTYH1.2	2.62743e-121	-0.983893	0.34	0.678	8.81188e-117	3	TTYH1
LCOR	2.83499e-121	0.602474	0.678	0.437	9.50799e-117	3	LCOR
HSPB1.1	1.16024e-120	-0.643708	0.139	0.579	3.89122e-116	3	HSPB1
CDK5R1	1.55982e-120	0.462883	0.342	0.101	5.23134e-116	3	CDK5R1
SELENOP.3	1.63418e-120	-0.893731	0.039	0.447	5.48073e-116	3	SELENOP
HMX1.3	2.47132e-119	-1.22887	0.106	0.506	8.2883e-115	3	HMX1
PDK1	3.87154e-119	0.583763	0.369	0.119	1.29844e-114	3	PDK1
TYMS.3	5.6228e-119	-0.900246	0.106	0.516	1.88578e-114	3	TYMS
CXADR.1	9.37288e-119	0.654936	0.745	0.548	3.14348e-114	3	CXADR
LINC01833.2	1.33923e-118	-0.821628	0.163	0.576	4.49151e-114	3	LINC01833
PAK5	6.41956e-118	0.397587	0.284	0.069	2.15299e-113	3	PAK5
CYP1B1.3	7.95638e-118	-1.85826	0.141	0.527	2.66841e-113	3	CYP1B1
TOMM20.2	9.2039e-118	0.539765	0.914	0.797	3.0868e-113	3	TOMM20
DNPH1	1.22815e-117	-0.614706	0.15	0.584	4.11898e-113	3	DNPH1
ACTG1	3.91246e-117	0.408367	1	0.991	1.31216e-112	3	ACTG1
VAMP2	4.647e-117	0.551076	0.805	0.642	1.55851e-112	3	VAMP2
NME4	7.54874e-117	-0.683876	0.296	0.685	2.5317e-112	3	NME4
HNRNPM.1	1.27372e-116	-0.697787	0.425	0.773	4.27182e-112	3	HNRNPM
ARHGEF9	1.38125e-116	0.517505	0.481	0.207	4.63244e-112	3	ARHGEF9
PON2.1	1.77895e-116	-0.565961	0.121	0.552	5.96623e-112	3	PON2
PALLD.2	3.41466e-116	-0.741019	0.318	0.694	1.14521e-111	3	PALLD
HMGB2.3	4.77371e-116	-1.24152	0.286	0.659	1.60101e-111	3	HMGB2
MGST1.2	5.59813e-116	-0.894766	0.148	0.549	1.8775e-111	3	MGST1
ATP6V1G2	2.85448e-114	0.378054	0.279	0.069	9.57335e-110	3	ATP6V1G2
CKS1B.1	3.10971e-114	-0.839887	0.173	0.574	1.04293e-109	3	CKS1B
RAB31.3	3.46859e-114	-0.99101	0.178	0.575	1.16329e-109	3	RAB31
FSTL1.1	2.20221e-113	-0.625278	0.067	0.47	7.38576e-109	3	FSTL1
GDI1.1	3.3729e-113	0.603787	0.634	0.385	1.1312e-108	3	GDI1
NNAT.2	4.1672e-113	0.528106	0.888	0.695	1.39759e-108	3	NNAT
COL11A1.2	2.78764e-112	-0.609165	0.067	0.469	9.34917e-108	3	COL11A1
TJP1	3.03807e-112	-0.591708	0.19	0.611	1.01891e-107	3	TJP1
HSP90B1.2	5.70679e-112	-0.757753	0.624	0.811	1.91394e-107	3	HSP90B1
MAB21L1.2	3.26034e-111	-1.08466	0.064	0.45	1.09345e-106	3	MAB21L1
CRABP1.3	8.16357e-111	-1.31935	0.69	0.864	2.7379e-106	3	CRABP1
EIF4A2	8.90609e-111	0.488342	0.899	0.791	2.98693e-106	3	EIF4A2
PFN1.1	1.02907e-110	-0.614976	0.675	0.843	3.45129e-106	3	PFN1
RPS3.1	1.33123e-110	-0.343268	0.985	0.968	4.46469e-106	3	RPS3
RBFOX2.1	2.98731e-110	0.555131	0.698	0.467	1.00188e-105	3	RBFOX2
RPL10A.1	1.79472e-109	-0.378394	0.972	0.95	6.01912e-105	3	RPL10A
PDPN.1	2.30014e-109	-0.574244	0.06	0.455	7.7142e-105	3	PDPN
DEK.1	4.25519e-109	-0.709892	0.628	0.831	1.42711e-104	3	DEK
FAT1.3	7.31368e-109	-0.671628	0.184	0.59	2.45286e-104	3	FAT1
MEAF6	1.08666e-108	0.56455	0.749	0.565	3.64443e-104	3	MEAF6
KIAA1217.2	1.14614e-108	-0.725985	0.045	0.432	3.84392e-104	3	KIAA1217
GLO1	2.9259e-108	-0.599848	0.269	0.667	9.81287e-104	3	GLO1
SYT14	3.27531e-108	0.353199	0.257	0.061	1.09847e-103	3	SYT14
PKDCC.2	4.45226e-108	-0.864664	0.092	0.478	1.4932e-103	3	PKDCC
GULP1.2	4.62955e-108	-0.666926	0.099	0.5	1.55266e-103	3	GULP1
KDM6B	4.94511e-108	0.568067	0.578	0.312	1.65849e-103	3	KDM6B
HSPD1.1	2.55486e-107	-0.591449	0.705	0.851	8.56848e-103	3	HSPD1
UACA.2	5.24643e-107	-0.684494	0.046	0.43	1.75955e-102	3	UACA
PPP1R1A	7.1107e-107	0.479137	0.34	0.107	2.38479e-102	3	PPP1R1A
SLC16A1.1	1.00774e-106	-0.554117	0.129	0.539	3.37976e-102	3	SLC16A1
RPL27A	2.40244e-106	-0.346643	0.979	0.949	8.0573e-102	3	RPL27A
TUBA1B.2	2.46514e-106	-0.897646	0.919	0.935	8.2676e-102	3	TUBA1B
YWHAG	3.90818e-106	0.548648	0.734	0.541	1.31073e-101	3	YWHAG
NACAD	4.1145e-106	0.362519	0.293	0.081	1.37992e-101	3	NACAD
FKBP10	5.31638e-106	-0.513781	0.05	0.438	1.78301e-101	3	FKBP10
RAN.1	1.5724e-105	-0.500398	0.875	0.9	5.27351e-101	3	RAN
TMEM35A	1.36086e-103	0.485071	0.366	0.128	4.56406e-99	3	TMEM35A
WEE1.2	2.78422e-103	-0.645131	0.09	0.478	9.3377e-99	3	WEE1
RARRES2.2	3.66633e-103	-0.718244	0.062	0.436	1.22961e-98	3	RARRES2
PRDX1	5.19682e-103	-0.574157	0.565	0.816	1.74291e-98	3	PRDX1
IGFBP2.3	6.36248e-103	0.737896	0.968	0.91	2.13385e-98	3	IGFBP2
RHOC.1	1.33008e-102	-0.548324	0.087	0.481	4.46081e-98	3	RHOC
ETFB	1.69703e-102	0.580623	0.779	0.625	5.69151e-98	3	ETFB
CDH6.2	3.07945e-102	-1.28432	0.135	0.496	1.03279e-97	3	CDH6
CD200	5.80121e-102	0.530849	0.506	0.252	1.94561e-97	3	CD200
PLXDC2.1	2.03481e-101	-0.567111	0.042	0.41	6.82434e-97	3	PLXDC2
FUS	3.42429e-101	-0.560739	0.669	0.857	1.14844e-96	3	FUS
RGS5.2	5.53392e-101	-0.850142	0.054	0.416	1.85597e-96	3	RGS5
JPH4	1.79917e-100	0.397109	0.322	0.101	6.03407e-96	3	JPH4
LAPTM4B	1.80041e-100	-0.564201	0.371	0.727	6.03821e-96	3	LAPTM4B
SRSF3	2.66378e-100	-0.534817	0.72	0.868	8.93379e-96	3	SRSF3
BRK1	2.04214e-99	0.473051	0.897	0.801	6.84893e-95	3	BRK1
PLPP3.2	5.74525e-99	-0.577699	0.029	0.389	1.92684e-94	3	PLPP3
TPM2.2	1.29335e-98	-0.82086	0.106	0.474	4.33764e-94	3	TPM2
HK2	1.80355e-98	0.486228	0.265	0.072	6.04874e-94	3	HK2
CENPF.2	2.49496e-98	-1.48757	0.128	0.492	8.3676e-94	3	CENPF
CD63.2	2.5396e-98	-0.55736	0.716	0.851	8.5173e-94	3	CD63
TSPAN6	5.89572e-98	-0.521977	0.204	0.603	1.97731e-93	3	TSPAN6
RAB13.1	1.57371e-97	-0.566469	0.128	0.519	5.27791e-93	3	RAB13
NARF	9.21865e-97	0.544026	0.662	0.454	3.09175e-92	3	NARF
AC007938.3	1.19702e-96	0.383386	0.277	0.078	4.01458e-92	3	AC007938.3
LRP2.2	1.27919e-96	-0.54274	0.063	0.432	4.29015e-92	3	LRP2
PRKDC	1.61391e-96	-0.613534	0.523	0.778	5.41273e-92	3	PRKDC
CALU.1	2.29215e-96	-0.601854	0.33	0.686	7.6874e-92	3	CALU
PRSS23.2	7.10729e-96	-0.952628	0.1	0.459	2.38364e-91	3	PRSS23
CLIC1.1	8.4676e-96	-0.555502	0.464	0.789	2.83986e-91	3	CLIC1
PRKAR2B	1.21481e-95	0.592853	0.521	0.284	4.07423e-91	3	PRKAR2B
FAM155A	1.28704e-95	0.370502	0.256	0.067	4.31649e-91	3	FAM155A
FXYD6	1.33558e-95	0.539629	0.803	0.669	4.47928e-91	3	FXYD6
AMER2	2.38268e-95	0.429336	0.366	0.134	7.99103e-91	3	AMER2
SEC11A	2.44808e-95	-0.518311	0.589	0.815	8.21037e-91	3	SEC11A
PAFAH1B1	2.62348e-95	0.499367	0.776	0.628	8.79862e-91	3	PAFAH1B1
GABARAPL2	1.02178e-94	0.443125	0.844	0.727	3.42684e-90	3	GABARAPL2
CYBA.2	1.16725e-94	-0.539173	0.102	0.477	3.91473e-90	3	CYBA
FOXG1.3	1.60239e-94	0.462695	0.77	0.461	5.37409e-90	3	FOXG1
GPC4.1	2.96535e-94	-0.581529	0.083	0.447	9.94521e-90	3	GPC4
TUBB.1	3.19173e-94	0.369237	0.994	0.942	1.07044e-89	3	TUBB
SARAF.1	3.22114e-94	0.569619	0.829	0.716	1.08031e-89	3	SARAF
CALY	4.27943e-94	0.469148	0.275	0.079	1.43524e-89	3	CALY
MYL12A.2	1.36168e-93	-0.614541	0.434	0.751	4.56682e-89	3	MYL12A
RPL35	2.82519e-93	-0.368982	0.942	0.932	9.47513e-89	3	RPL35
CSRP2.2	3.25337e-93	-0.68407	0.548	0.795	1.09112e-88	3	CSRP2
CP.2	5.69734e-93	-1.1596	0.052	0.389	1.91078e-88	3	CP
TCF7L2	1.905e-92	-0.521731	0.086	0.451	6.389e-88	3	TCF7L2
EVL	2.48803e-92	0.498834	0.744	0.589	8.34437e-88	3	EVL
CTGF.2	6.32263e-92	-1.44709	0.148	0.482	2.12048e-87	3	CTGF
SHROOM3.1	1.1994e-91	-0.491236	0.091	0.455	4.02253e-87	3	SHROOM3
MT-ND4.1	1.41996e-91	-0.50169	0.934	0.922	4.76225e-87	3	MT-ND4
HMGB1.2	1.66954e-91	-0.568899	0.965	0.955	5.5993e-87	3	HMGB1
POU3F1	2.24997e-91	0.451717	0.267	0.074	7.54595e-87	3	POU3F1
TGIF1	2.93897e-91	-0.461227	0.024	0.361	9.85672e-87	3	TGIF1
NDN.1	4.9335e-91	0.599332	0.794	0.663	1.6546e-86	3	NDN
OSTC	5.10874e-91	-0.519103	0.48	0.772	1.71337e-86	3	OSTC
RAI14	1.55179e-90	-0.540458	0.175	0.551	5.20441e-86	3	RAI14
FAM162A.1	1.58604e-90	0.802666	0.695	0.534	5.31927e-86	3	FAM162A
FBN2.2	3.70202e-90	-0.541403	0.03	0.366	1.24158e-85	3	FBN2
IER2.3	3.87385e-90	-0.712522	0.542	0.791	1.29921e-85	3	IER2
RBMS1.1	8.23634e-90	-0.606262	0.057	0.398	2.7623e-85	3	RBMS1
HSPE1.1	3.24914e-89	-0.537683	0.576	0.815	1.0897e-84	3	HSPE1
PPFIA2	7.76474e-89	0.339563	0.262	0.074	2.60414e-84	3	PPFIA2
COL18A1.2	8.09531e-89	-0.538272	0.056	0.399	2.715e-84	3	COL18A1
NDRG4	2.23114e-88	0.415972	0.338	0.123	7.48279e-84	3	NDRG4
SERPINH1	2.81425e-88	-0.442111	0.043	0.384	9.43845e-84	3	SERPINH1
DACT3	4.93694e-88	0.391902	0.296	0.096	1.65575e-83	3	DACT3
RTN3	5.16851e-88	0.429543	0.888	0.788	1.73342e-83	3	RTN3
CMTM6	7.28617e-88	-0.446189	0.113	0.486	2.44364e-83	3	CMTM6
WWTR1	1.13195e-87	-0.442801	0.034	0.367	3.79633e-83	3	WWTR1
PARP1	1.22388e-87	-0.591759	0.517	0.777	4.10463e-83	3	PARP1
RAB34.2	2.10982e-87	-0.503293	0.095	0.45	7.07593e-83	3	RAB34
LIMCH1.2	2.30945e-87	-0.538393	0.128	0.491	7.74543e-83	3	LIMCH1
NOVA2	3.30405e-87	0.464696	0.444	0.207	1.10811e-82	3	NOVA2
PDIA6	5.3956e-87	-0.529808	0.611	0.81	1.80958e-82	3	PDIA6
ENO1.2	8.16067e-87	0.642067	0.946	0.894	2.73692e-82	3	ENO1
ANP32E.1	1.30182e-86	-0.652683	0.431	0.728	4.36603e-82	3	ANP32E
CLU.2	1.47892e-86	-0.678674	0.313	0.667	4.96001e-82	3	CLU
PHGDH.2	2.52192e-86	-0.557284	0.146	0.505	8.458e-82	3	PHGDH
C4orf48	1.76068e-85	0.47374	0.835	0.727	5.90496e-81	3	C4orf48
CDK4	1.95306e-85	-0.516906	0.272	0.636	6.55016e-81	3	CDK4
SNRPB.1	3.74076e-85	-0.582486	0.469	0.741	1.25458e-80	3	SNRPB
KMT2E	4.59515e-85	0.462669	0.797	0.651	1.54112e-80	3	KMT2E
TSPAN7	5.41073e-85	0.513795	0.334	0.123	1.81465e-80	3	TSPAN7
KIFAP3	8.53809e-85	0.577664	0.565	0.346	2.8635e-80	3	KIFAP3
ZNF292.1	1.58822e-84	0.566645	0.815	0.707	5.32658e-80	3	ZNF292
CDH11.2	2.78357e-84	-0.67298	0.075	0.409	9.33552e-80	3	CDH11
YAP1	3.25841e-84	-0.417703	0.039	0.367	1.0928e-79	3	YAP1
CAST	3.4959e-84	-0.487553	0.069	0.407	1.17246e-79	3	CAST
MCM3.1	3.79153e-84	-0.554271	0.061	0.391	1.2716e-79	3	MCM3
ANP32B.1	5.24415e-84	-0.581611	0.551	0.777	1.75878e-79	3	ANP32B
ACAA2	7.83301e-84	-0.460833	0.171	0.538	2.62703e-79	3	ACAA2
TCF7L1	1.02103e-83	-0.406563	0.03	0.351	3.42433e-79	3	TCF7L1
PKIA	1.19178e-83	0.61303	0.611	0.429	3.99698e-79	3	PKIA
SEMA5A.2	1.74662e-83	-0.614321	0.13	0.479	5.8578e-79	3	SEMA5A
ODC1	2.70092e-83	-0.528176	0.671	0.837	9.05834e-79	3	ODC1
NCL	4.42166e-83	-0.448218	0.89	0.912	1.48294e-78	3	NCL
PFKFB3	5.74616e-83	0.376571	0.251	0.074	1.92715e-78	3	PFKFB3
CTNNAL1	9.06415e-83	-0.476092	0.116	0.468	3.03994e-78	3	CTNNAL1
GLI3	1.43504e-82	-0.422571	0.025	0.341	4.81283e-78	3	GLI3
LGR4.2	1.90353e-82	-0.468509	0.059	0.393	6.38406e-78	3	LGR4
SMC4.2	2.52091e-82	-0.804479	0.143	0.473	8.45463e-78	3	SMC4
CMIP	3.25326e-82	0.475784	0.485	0.263	1.09108e-77	3	CMIP
PCBP4.1	4.88719e-82	0.436412	0.629	0.398	1.63907e-77	3	PCBP4
FGFBP3.3	5.47566e-82	-0.744215	0.187	0.524	1.83643e-77	3	FGFBP3
ADGRV1.2	8.33856e-82	-0.55809	0.095	0.435	2.79659e-77	3	ADGRV1
ADGRG1.2	3.04636e-81	0.463203	0.46	0.23	1.02169e-76	3	ADGRG1
NASP.1	4.28228e-81	-0.660452	0.653	0.809	1.43619e-76	3	NASP
SBK1	6.43636e-81	0.468522	0.483	0.26	2.15863e-76	3	SBK1
TMEM123.1	7.61544e-81	-0.461082	0.218	0.591	2.55407e-76	3	TMEM123
GAS1.2	1.04461e-80	-0.66476	0.03	0.339	3.50341e-76	3	GAS1
AKAP9.1	1.88609e-80	0.469898	0.845	0.72	6.32555e-76	3	AKAP9
KDM5B.1	1.90016e-80	0.484433	0.749	0.587	6.37275e-76	3	KDM5B
PAFAH1B3	3.23221e-80	0.49532	0.827	0.727	1.08402e-75	3	PAFAH1B3
GPX8	3.28605e-80	-0.4066	0.027	0.336	1.10208e-75	3	GPX8
MARCH6.1	4.50659e-80	0.473194	0.762	0.645	1.51142e-75	3	MARCH6
TUT4	5.64931e-80	0.442419	0.824	0.723	1.89467e-75	3	TUT4
DDX24	7.02168e-80	0.461745	0.795	0.685	2.35493e-75	3	DDX24
MTSS1	8.4123e-80	0.360682	0.367	0.15	2.82132e-75	3	MTSS1
RAX.2	1.03708e-79	-0.867224	0.048	0.354	3.47817e-75	3	RAX
MAPRE3	1.92665e-79	0.400804	0.357	0.147	6.4616e-75	3	MAPRE3
GINS2.1	2.38179e-79	-0.543748	0.054	0.369	7.98804e-75	3	GINS2
RPSA.1	4.63045e-79	-0.304495	0.984	0.947	1.55296e-74	3	RPSA
SDC2	1.03788e-78	-0.49039	0.131	0.472	3.48084e-74	3	SDC2
DHFR.1	1.54587e-78	-0.531589	0.084	0.405	5.18454e-74	3	DHFR
DKK3.2	2.38683e-78	-0.626366	0.248	0.58	8.00494e-74	3	DKK3
ZFAS1.1	2.85667e-78	0.439493	0.923	0.845	9.5807e-74	3	ZFAS1
RANBP1.2	4.46856e-78	-0.582607	0.612	0.798	1.49867e-73	3	RANBP1
SPHK1.3	4.66086e-78	-0.608192	0.038	0.339	1.56316e-73	3	SPHK1
QKI.2	4.94335e-78	-0.608809	0.508	0.774	1.6579e-73	3	QKI
PBX3.1	9.24176e-78	0.531361	0.544	0.333	3.0995e-73	3	PBX3
LITAF	1.47198e-77	-0.420922	0.045	0.355	4.93673e-73	3	LITAF
ONECUT2	1.92155e-77	0.265255	0.315	0.106	6.44448e-73	3	ONECUT2
FEZ1.2	2.25462e-77	0.464321	0.69	0.488	7.56153e-73	3	FEZ1
CENPU.2	2.31519e-77	-0.566937	0.046	0.353	7.76468e-73	3	CENPU
PKM.1	3.71608e-77	0.489538	0.928	0.848	1.2463e-72	3	PKM
APC2	4.00046e-77	0.381607	0.376	0.161	1.34167e-72	3	APC2
TLN1.1	4.31103e-77	-0.449898	0.077	0.402	1.44583e-72	3	TLN1
PDIA3.1	6.93326e-77	-0.529442	0.523	0.767	2.32528e-72	3	PDIA3
TMBIM4.1	8.08797e-77	-0.480903	0.241	0.596	2.71254e-72	3	TMBIM4
GGH	2.14259e-76	-0.465398	0.177	0.517	7.18581e-72	3	GGH
PHF21B	2.22407e-76	0.356516	0.318	0.118	7.45909e-72	3	PHF21B
MXI1	2.26555e-76	0.577106	0.487	0.275	7.5982e-72	3	MXI1
TEAD2	2.67839e-76	-0.380041	0.063	0.383	8.98279e-72	3	TEAD2
RPS27A.1	3.51152e-76	-0.267283	0.991	0.971	1.17769e-71	3	RPS27A
SLC25A3	4.72539e-76	-0.361192	0.898	0.904	1.5848e-71	3	SLC25A3
STMN1.2	7.80118e-76	0.490067	0.991	0.952	2.61636e-71	3	STMN1
BMPR1B	1.68792e-75	-0.456002	0.014	0.302	5.66094e-71	3	BMPR1B
TUBB4A	1.70877e-74	0.398063	0.342	0.141	5.73088e-70	3	TUBB4A
PCNA.2	1.89436e-74	-0.609497	0.172	0.495	6.35331e-70	3	PCNA
RND3.2	2.10935e-74	0.605515	0.73	0.548	7.07433e-70	3	RND3
SEMA6A.2	2.80203e-74	-0.641187	0.22	0.539	9.39744e-70	3	SEMA6A
SRCIN1	3.37237e-74	0.353466	0.269	0.09	1.13102e-69	3	SRCIN1
DNER.1	4.91409e-74	0.508149	0.479	0.257	1.64809e-69	3	DNER
DCLK2	6.87425e-74	0.515082	0.41	0.203	2.30548e-69	3	DCLK2
DTD1.1	9.44296e-74	0.447721	0.676	0.516	3.16698e-69	3	DTD1
ABAT	1.11611e-73	0.444845	0.653	0.465	3.74321e-69	3	ABAT
FLNA	1.25659e-73	-0.441733	0.16	0.503	4.21434e-69	3	FLNA
EPB41L2.1	1.50331e-73	-0.435677	0.045	0.346	5.04181e-69	3	EPB41L2
FTX.1	1.70233e-73	0.47117	0.672	0.505	5.70929e-69	3	FTX
C19orf48	1.93926e-73	-0.403631	0.072	0.382	6.5039e-69	3	C19orf48
MIS18BP1.2	2.25559e-73	-0.623224	0.089	0.395	7.5648e-69	3	MIS18BP1
H2AFV.1	4.33908e-73	-0.525649	0.488	0.747	1.45524e-68	3	H2AFV
SIVA1.1	6.29475e-73	-0.505657	0.295	0.624	2.11113e-68	3	SIVA1
MAN1A1.2	6.43464e-73	-0.4494	0.033	0.323	2.15805e-68	3	MAN1A1
MAD2L1.2	6.75598e-73	-0.630466	0.091	0.395	2.26582e-68	3	MAD2L1
CKS2.1	9.4858e-73	-0.72607	0.192	0.519	3.18135e-68	3	CKS2
TGFB2.2	1.71012e-72	-0.499919	0.029	0.314	5.73539e-68	3	TGFB2
RPL22L1	1.76483e-72	-0.48342	0.228	0.569	5.9189e-68	3	RPL22L1
LAPTM4A.1	2.01531e-72	-0.472815	0.439	0.732	6.75896e-68	3	LAPTM4A
ZNF91.1	3.6233e-72	0.444369	0.61	0.421	1.21518e-67	3	ZNF91
NUSAP1.3	4.36786e-72	-0.893114	0.056	0.345	1.46489e-67	3	NUSAP1
PCDH7.3	4.42899e-72	-0.779641	0.221	0.519	1.48539e-67	3	PCDH7
RFLNB.3	4.54161e-72	-0.446372	0.053	0.35	1.52317e-67	3	RFLNB
TP53I13	7.22745e-72	-0.35117	0.041	0.337	2.42394e-67	3	TP53I13
SNHG18.1	8.27676e-72	-0.393457	0.044	0.34	2.77586e-67	3	SNHG18
PPM1K	8.91924e-72	0.421218	0.311	0.121	2.99133e-67	3	PPM1K
LTBP1	9.46789e-72	-0.376496	0.016	0.293	3.17534e-67	3	LTBP1
PCLAF.3	1.12643e-71	-0.690388	0.061	0.354	3.77782e-67	3	PCLAF
ECI1	1.24581e-71	-0.458695	0.261	0.604	4.1782e-67	3	ECI1
H2AFX.2	2.04334e-71	-0.650661	0.147	0.455	6.85297e-67	3	H2AFX
TCEAL9	2.20369e-71	-0.525509	0.36	0.675	7.39074e-67	3	TCEAL9
BDH2	3.24029e-71	-0.418216	0.134	0.468	1.08673e-66	3	BDH2
GJA1.2	3.57273e-71	-0.491688	0.025	0.306	1.19822e-66	3	GJA1
BARD1	4.12921e-71	-0.397747	0.052	0.347	1.38486e-66	3	BARD1
APOE.3	7.58549e-71	-0.811169	0.118	0.417	2.54402e-66	3	APOE
TPI1	1.08781e-70	0.462742	0.955	0.885	3.64828e-66	3	TPI1
ALYREF	1.40399e-70	-0.436561	0.143	0.465	4.70869e-66	3	ALYREF
CENPH.1	1.43647e-70	-0.462137	0.074	0.374	4.81762e-66	3	CENPH
AGAP1	1.53852e-70	0.481088	0.458	0.254	5.1599e-66	3	AGAP1
GYG1.2	1.68616e-70	-0.508879	0.055	0.348	5.65505e-66	3	GYG1
CST3.1	2.22072e-70	-0.512582	0.393	0.695	7.44785e-66	3	CST3
MIR99AHG.2	2.89187e-70	-0.430385	0.066	0.368	9.69874e-66	3	MIR99AHG
BIRC5.1	3.01678e-70	-0.6315	0.033	0.311	1.01177e-65	3	BIRC5
ORC6.1	3.49616e-70	-0.520066	0.078	0.377	1.17254e-65	3	ORC6
ARL4D	4.64824e-70	0.653748	0.409	0.21	1.55893e-65	3	ARL4D
RPS5.1	5.79585e-70	-0.288743	0.973	0.943	1.94381e-65	3	RPS5
TIMP1.1	1.16813e-69	-0.448248	0.17	0.5	3.91768e-65	3	TIMP1
S1PR3.2	1.38131e-69	-0.733032	0.044	0.322	4.63263e-65	3	S1PR3
TNRC6C	1.83764e-69	0.449218	0.474	0.272	6.16306e-65	3	TNRC6C
DCBLD2.1	2.32804e-69	-0.897886	0.455	0.708	7.80778e-65	3	DCBLD2
SFPQ	2.42277e-69	-0.483067	0.687	0.838	8.12548e-65	3	SFPQ
HES5.3	2.58302e-69	-1.04402	0.092	0.383	8.66294e-65	3	HES5
NAP1L1.1	2.62452e-69	-0.32962	0.968	0.935	8.80212e-65	3	NAP1L1
HMGA1.1	3.37415e-69	-0.481133	0.705	0.829	1.13162e-64	3	HMGA1
HTRA1.1	4.12257e-69	-0.446631	0.038	0.32	1.38263e-64	3	HTRA1
RNF165.1	8.32676e-69	0.457691	0.532	0.326	2.79263e-64	3	RNF165
SRSF2.1	8.63517e-69	-0.517456	0.532	0.767	2.89606e-64	3	SRSF2
HMGN5	1.16176e-68	-0.388735	0.058	0.353	3.8963e-64	3	HMGN5
RPAIN.1	1.40641e-68	0.435197	0.754	0.645	4.71681e-64	3	RPAIN
HSPA5.2	2.12554e-68	-0.565741	0.503	0.74	7.12863e-64	3	HSPA5
ZC2HC1A	3.32769e-68	0.461991	0.548	0.36	1.11604e-63	3	ZC2HC1A
APC	4.29462e-68	0.471461	0.584	0.401	1.44033e-63	3	APC
NENF	4.93369e-68	-0.366107	0.112	0.429	1.65466e-63	3	NENF
LAMP5	5.01924e-68	-0.613856	0.072	0.365	1.68335e-63	3	LAMP5
CLIP3	6.99494e-68	0.429281	0.474	0.276	2.34596e-63	3	CLIP3
PDIA4	8.08555e-68	-0.380418	0.131	0.452	2.71173e-63	3	PDIA4
GSTA4	1.17066e-67	0.460143	0.618	0.462	3.92615e-63	3	GSTA4
EGFR.2	1.30339e-67	-0.381031	0.021	0.29	4.3713e-63	3	EGFR
POLR2L.1	1.36199e-67	-0.482419	0.335	0.637	4.56786e-63	3	POLR2L
RGS2	1.39177e-67	0.416007	0.276	0.101	4.6677e-63	3	RGS2
CENPK.1	1.55008e-67	-0.477466	0.044	0.326	5.19866e-63	3	CENPK
DBI	1.61858e-67	-0.500769	0.465	0.735	5.42838e-63	3	DBI
LRCH2	1.78074e-67	0.353384	0.342	0.148	5.97224e-63	3	LRCH2
HELLS.1	2.55307e-67	-0.622176	0.209	0.512	8.56249e-63	3	HELLS
SRSF9	2.62868e-67	-0.398462	0.759	0.859	8.81605e-63	3	SRSF9
MEIS3	2.64908e-67	0.393012	0.468	0.265	8.8845e-63	3	MEIS3
COX7C	3.09565e-67	0.347604	0.958	0.879	1.03822e-62	3	COX7C
CCNB2.1	3.50044e-67	-0.625349	0.035	0.308	1.17398e-62	3	CCNB2
PABPC1.1	3.60723e-67	-0.435419	0.756	0.859	1.20979e-62	3	PABPC1
GNAS.1	4.56813e-67	0.617497	0.997	0.958	1.53206e-62	3	GNAS
METRNL.2	5.39909e-67	-0.429092	0.111	0.417	1.81075e-62	3	METRNL
SERPINB6	5.96043e-67	-0.425119	0.125	0.437	1.99901e-62	3	SERPINB6
DUSP6.2	9.75583e-67	-0.526099	0.105	0.399	3.27191e-62	3	DUSP6
CDK6.1	1.07984e-66	-0.419982	0.05	0.332	3.62158e-62	3	CDK6
ZEB2.1	1.45726e-66	-0.463219	0.195	0.524	4.88735e-62	3	ZEB2
CCDC112	1.58086e-66	0.486687	0.549	0.364	5.30188e-62	3	CCDC112
QPRT.3	2.17856e-66	-0.503218	0.26	0.578	7.30646e-62	3	QPRT
MKI67.2	2.80221e-66	-0.991417	0.056	0.324	9.39804e-62	3	MKI67
MSN	2.94068e-66	-0.384926	0.15	0.468	9.86245e-62	3	MSN
PAWR	2.99269e-66	-0.401482	0.122	0.437	1.00369e-61	3	PAWR
[truncated: 6,669 more rows]

## Sheet: ShortList
gene	p_val	avg_logFC	pct.1	pct.2	p_val_adj	cluster	gene
CP	0	1.55831	0.984	0.293	0	2	CP
CDH6	0	1.51978	0.993	0.408	0	2	CDH6
CYP1B1	0	1.45689	0.972	0.441	0	2	CYP1B1
LEFTY2	0	1.30933	0.596	0.102	0	2	LEFTY2
CRABP1	0	1.24451	1	0.833	0	2	CRABP1
DAPL1	0	1.24025	0.999	0.52	0	2	DAPL1
S1PR3	0	1.23203	0.926	0.231	0	2	S1PR3
CPE	0	1.1893	0.992	0.655	0	2	CPE
COL9A3	0	1.15932	0.803	0.186	0	2	COL9A3
SFRP2	0	1.14485	1	0.755	0	2	SFRP2
SEMA5A	0	0.958226	0.907	0.399	0	2	SEMA5A
PAX2	0	0.930533	0.769	0.169	0	2	PAX2
FGF9	0	0.784669	0.69	0.161	0	2	FGF9
COL13A1	0	0.623443	0.475	0.06	0	2	COL13A1
FGF8	1.77223e-213	0.46581	0.381	0.07	5.94372e-209	2	FGF8

## Sheet: Sheet2
gene	p_val	avg_logFC	pct.1	pct.2	p_val_adj	cluster	gene
CP	0	1.55831	0.984	0.293	0	2	CP
CDH6	0	1.51978	0.993	0.408	0	2	CDH6
CYP1B1	0	1.45689	0.972	0.441	0	2	CYP1B1
LEFTY2	0	1.30933	0.596	0.102	0	2	LEFTY2
CRABP1	0	1.24451	1	0.833	0	2	CRABP1
DAPL1	0	1.24025	0.999	0.52	0	2	DAPL1
S1PR3	0	1.23203	0.926	0.231	0	2	S1PR3
CPE	0	1.1893	0.992	0.655	0	2	CPE
COL9A3	0	1.15932	0.803	0.186	0	2	COL9A3
SFRP2	0	1.14485	1	0.755	0	2	SFRP2
SEMA5A	0	0.958226	0.907	0.399	0	2	SEMA5A
PAX2	0	0.930533	0.769	0.169	0	2	PAX2
FGF9	0	0.784669	0.69	0.161	0	2	FGF9
FGF8	1.77223e-213	0.46581	0.381	0.07	5.94372e-209	2	FGF8
